# Supplementary material
Source: publisher figshare collection journal article supplement (https://acs.figshare.com/ndownloader/files/5085256)
Supplement: Supplementary file 1 [file 5085256]

**Supporting Information for:**

**Squaric Acid-Based Peptidic Inhibitors of Matrix Metalloprotease-1 (MMP-1)**

*M. Burak Onaran, Anthony B Comeau, and Christopher T. Seto\**

Department of Chemistry, Brown University, Providence, Rhode Island 02912

Christopher\_Seto@brown.edu

**Table of Contents**

|                                                                                 |     |
|---------------------------------------------------------------------------------|-----|
| General Methods.....                                                            | S2  |
| <sup>1</sup> H and <sup>13</sup> C NMR spectra for compounds <b>3a-21</b> ..... | S3  |
| Lineweaver-Burke plot for compound <b>16</b> .....                              | S49 |
| References.....                                                                 | S50 |

**General Methods.** NMR spectra were recorded on 300 or 400 MHz instruments. Spectra were calibrated using TMS ( $\delta = 0.00$  ppm) for  $^1\text{H}$ -NMR, methanol- $d_4$  ( $\delta = 49.2$  ppm) or DMSO- $d_6$  ( $\delta = 39.5$  ppm) for  $^{13}\text{C}$ -NMR. Mass spectra were recorded using fast atom bombardment or electrospray ionization methods. Methylene chloride and methanol were used from a dry solvent dispensing system. All other reagents were used as received. Full characterization for compounds **3b**, **3c**, **3e**<sup>1</sup> and **10e**,<sup>2</sup> as well as  $^1\text{H}$  NMR spectra for compounds **10c** and **10f**<sup>3</sup> have been reported previously.  $^{13}\text{C}$  NMR spectra for compounds **18** and **19** (Figures S86 and S88, respectively) were recorded using an MRM/Protasis CapNMR<sup>TM</sup> flow probe. These spectra have two regions that contain additional resonances caused by the fluorocarbon background from the susceptibility matching fluid. Multiple  $^{13}\text{C}$ - $^{19}\text{F}$  couplings result in broad carbon peaks at  $\delta$  113.1, 110.3, 107.6, 104.8, 90.2, 87.9, 86.1, 84.0 ppm.

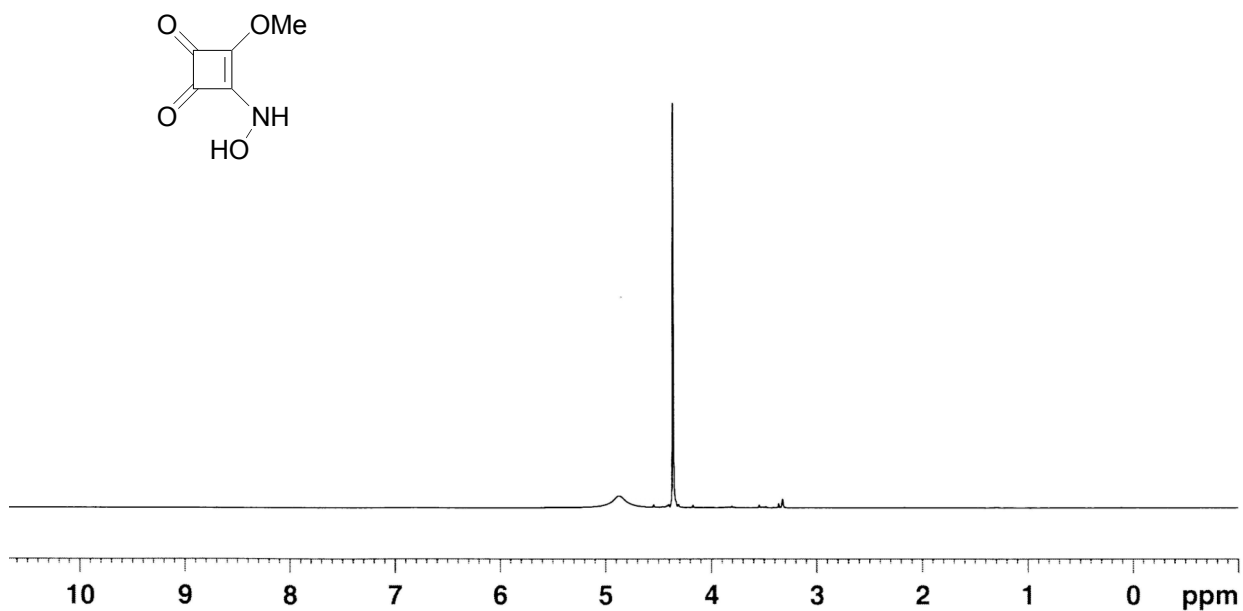

**Figure S1.**  $^1\text{H}$ -NMR spectrum of compound **3a**.

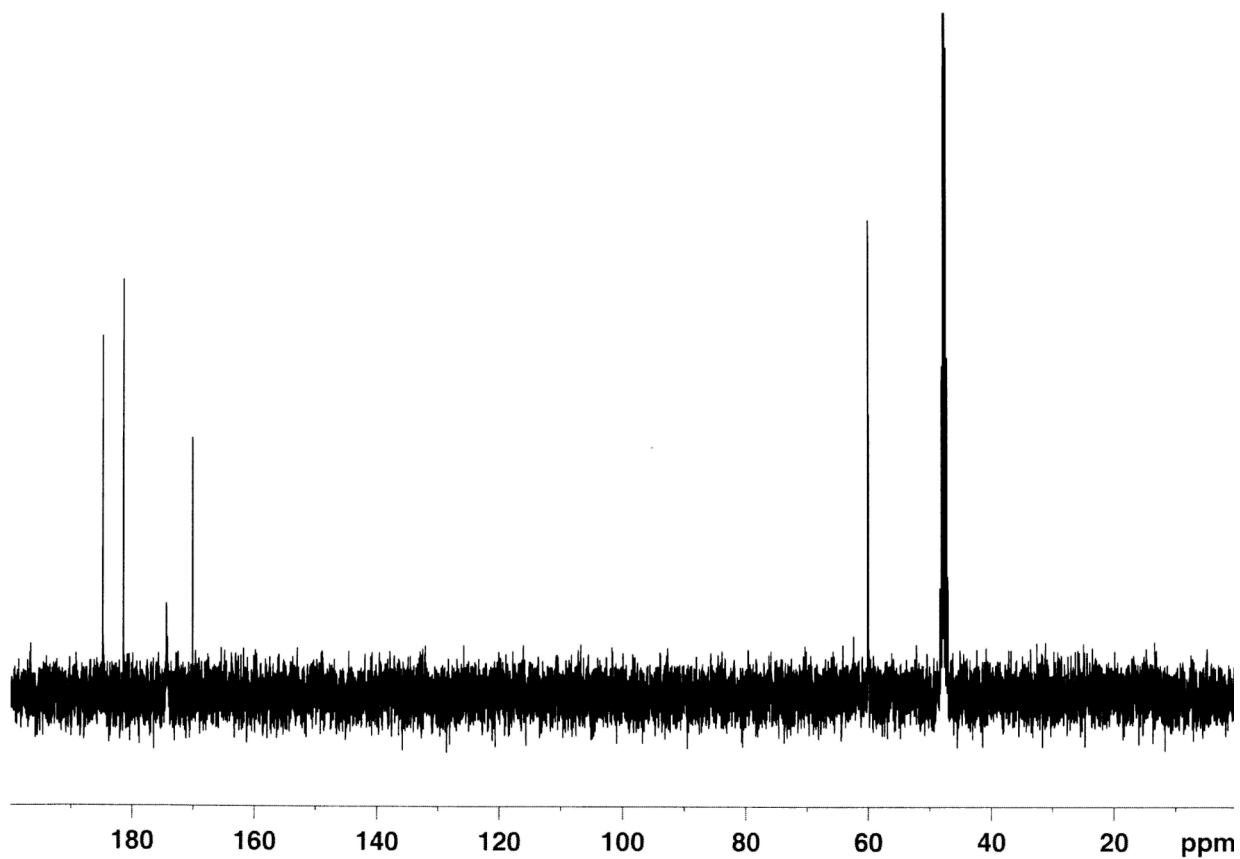

**Figure S2.**  $^{13}\text{C}$ -NMR spectrum of compound **3a**.

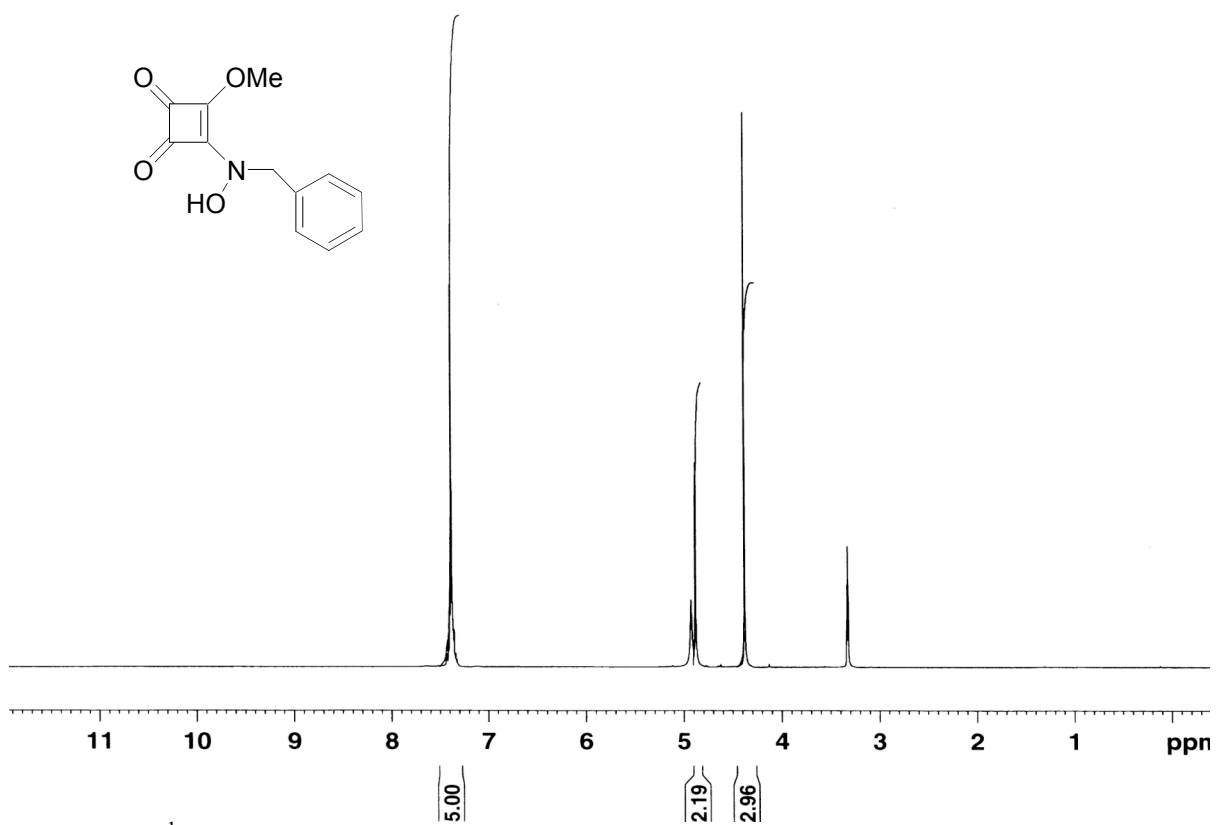

**Figure S3.** <sup>1</sup>H-NMR spectrum of compound 3d.

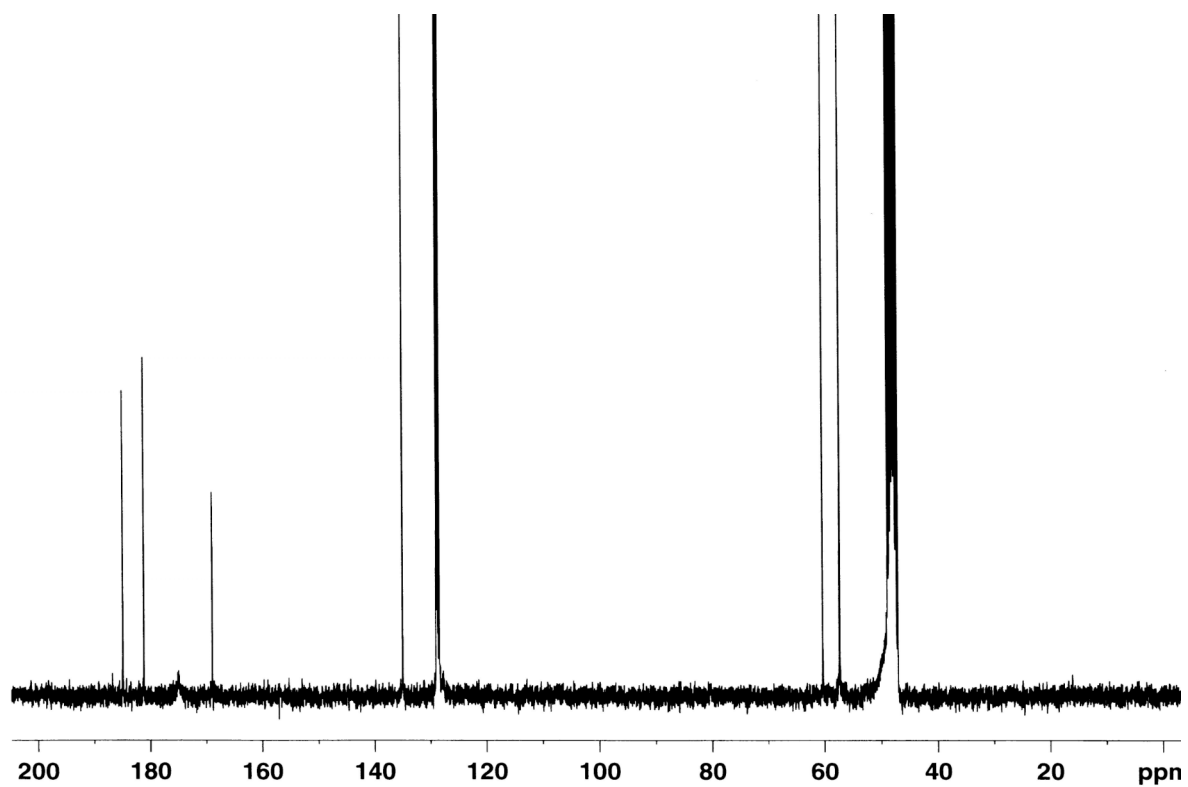

**Figure S4.** <sup>13</sup>C-NMR spectrum of compound 3d.



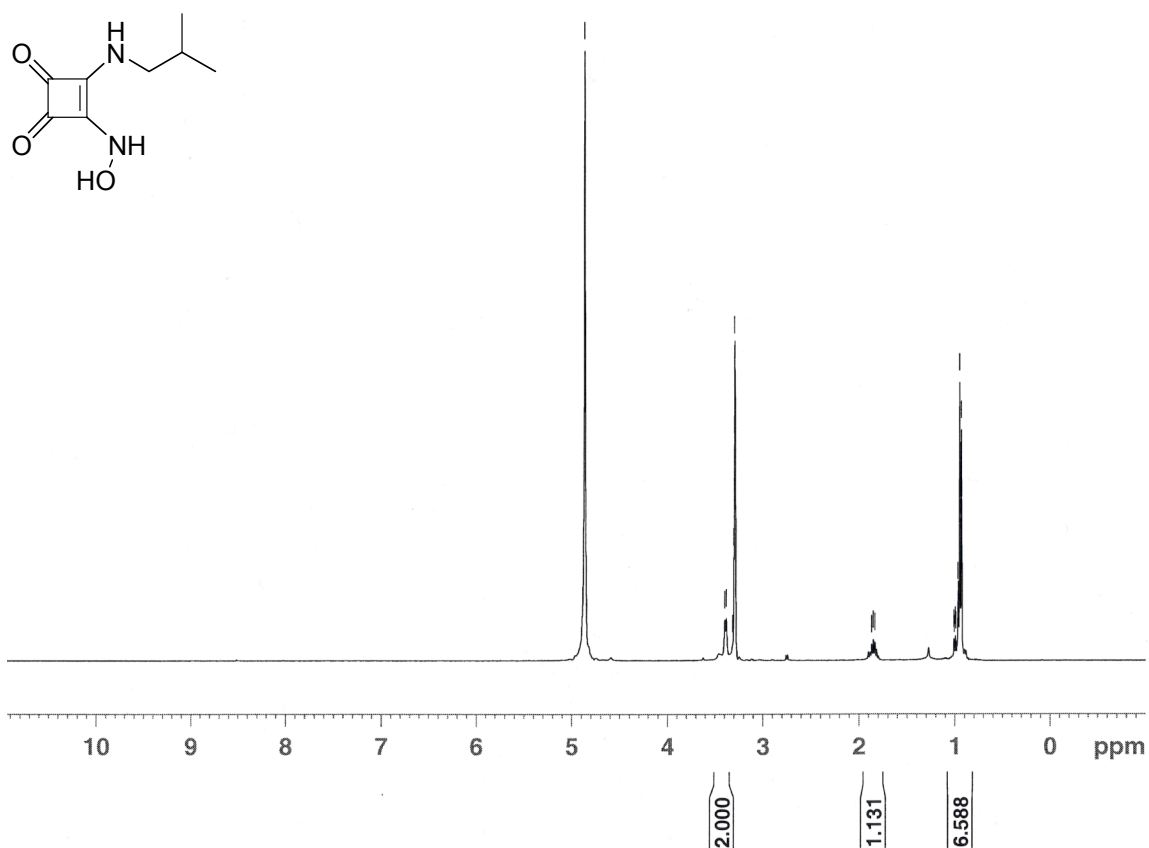

**Figure S5.** <sup>1</sup>H NMR spectrum of compound **4a**.

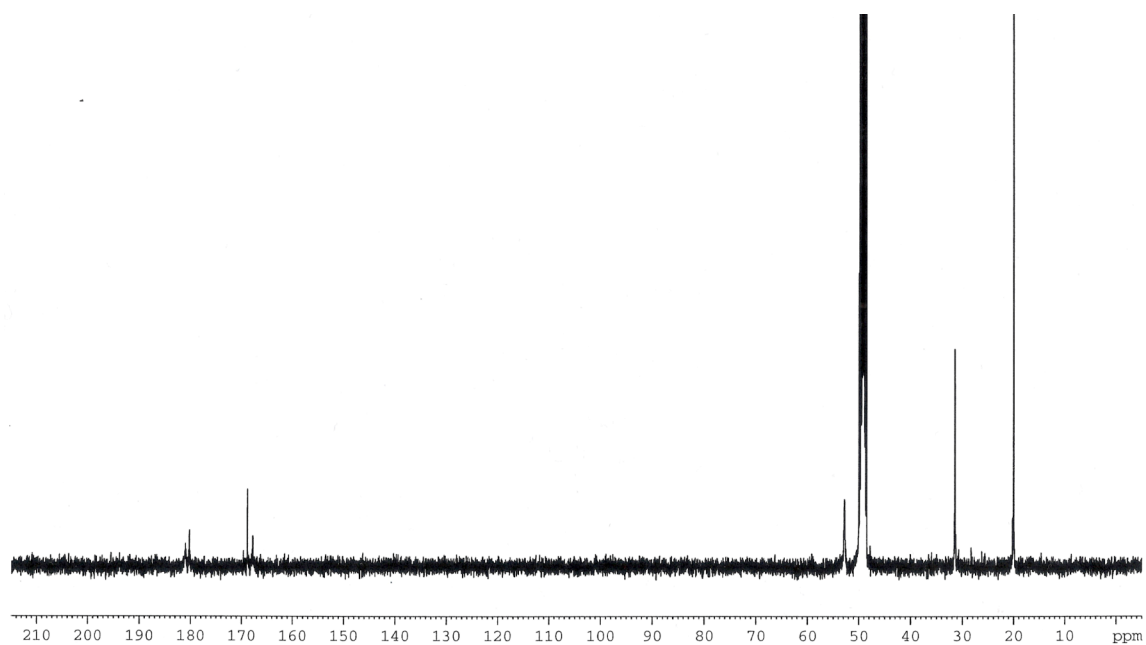

**Figure S6.** <sup>13</sup>C NMR spectrum of compound **4a**.

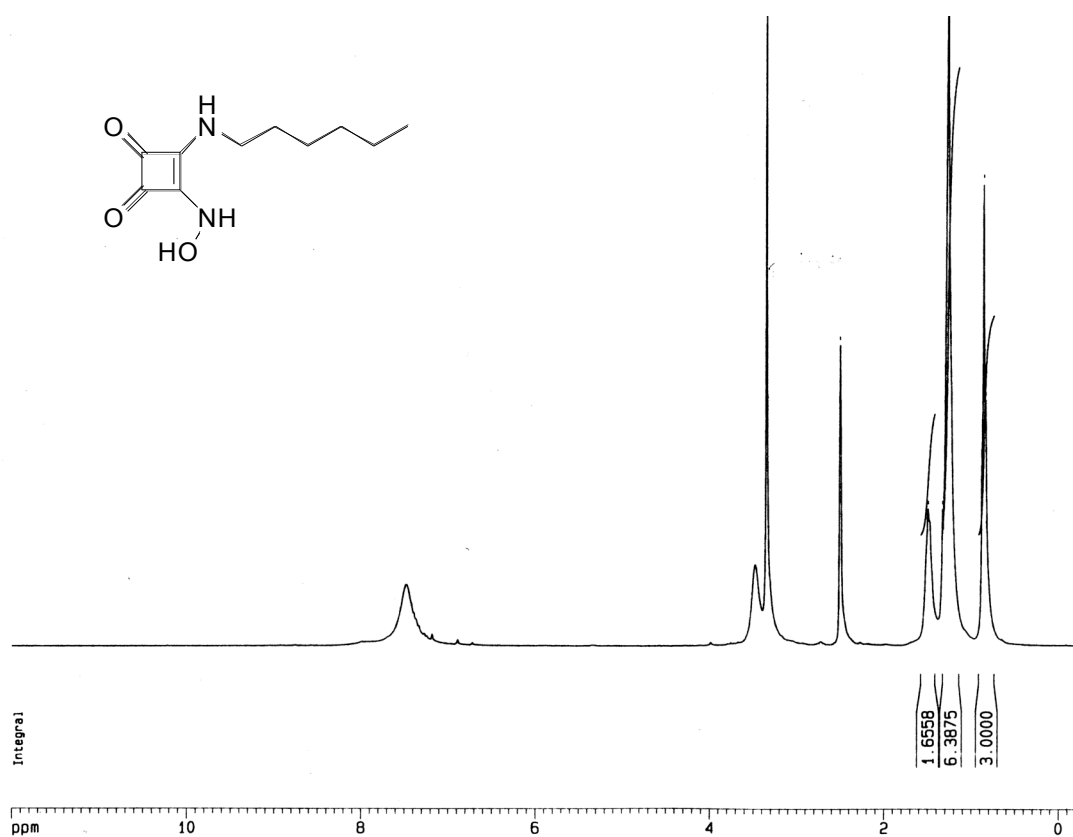

Figure S7. <sup>1</sup>H-NMR spectrum of compound **4b**.

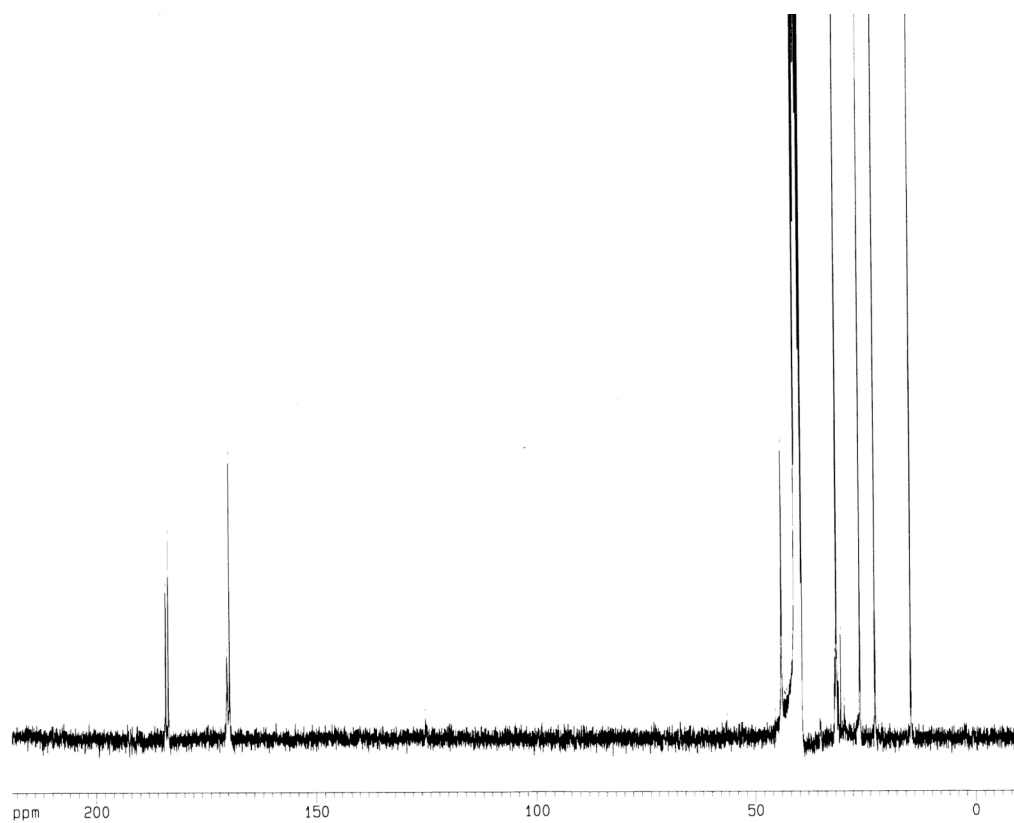

Figure S8. <sup>13</sup>C-NMR spectrum of compound **4b**.

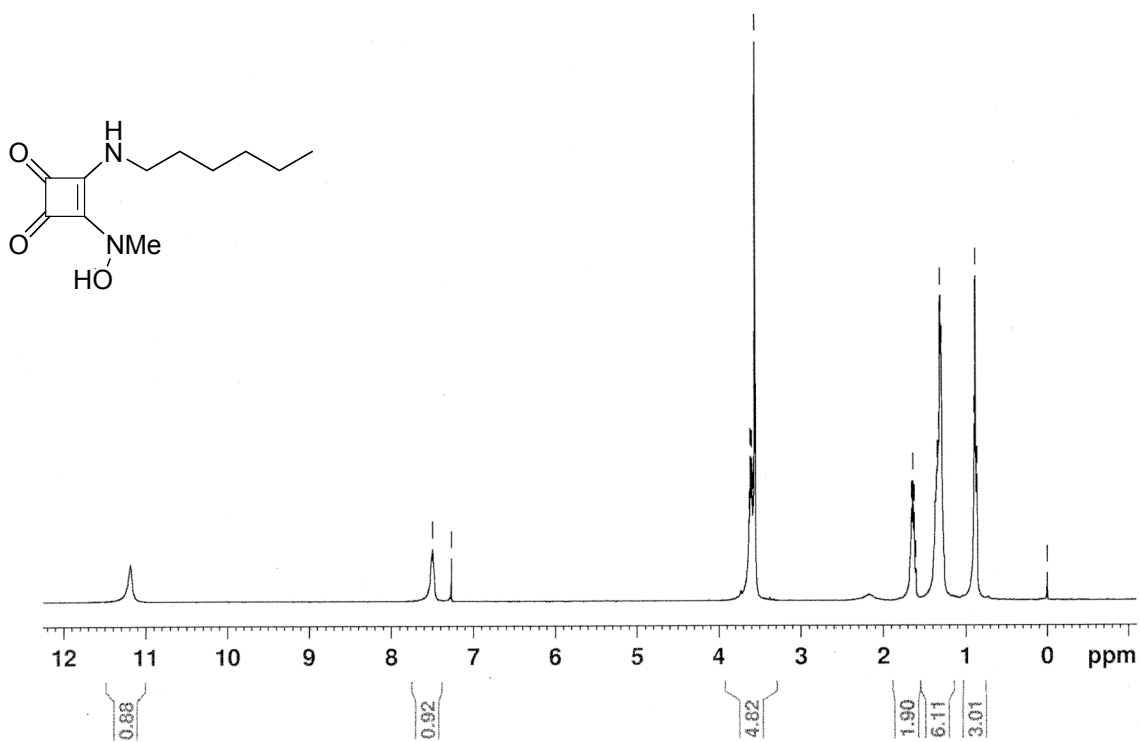

**Figure S9.**  $^1\text{H}$  NMR spectrum of compound 4c.

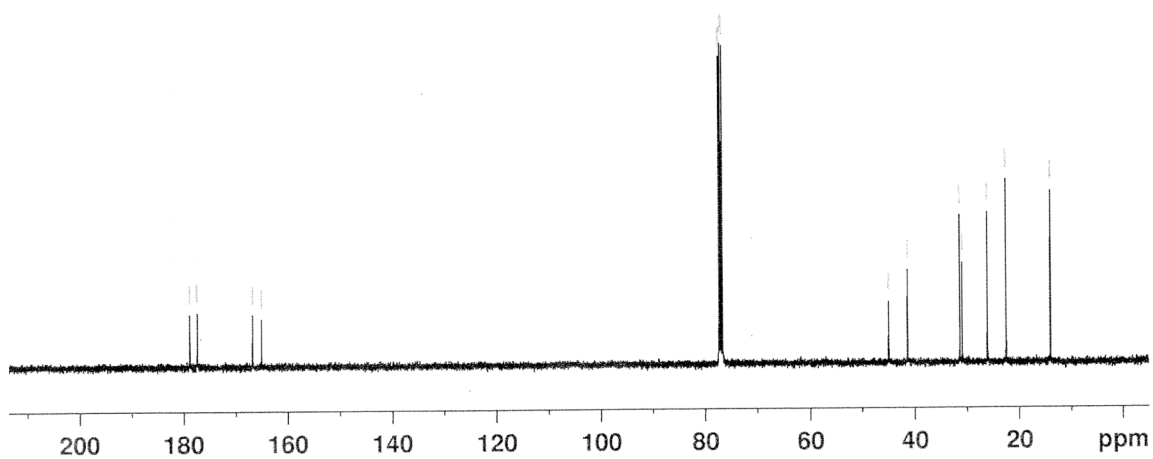

**Figure S10.**  $^{13}\text{C}$  NMR spectrum of compound 4c.

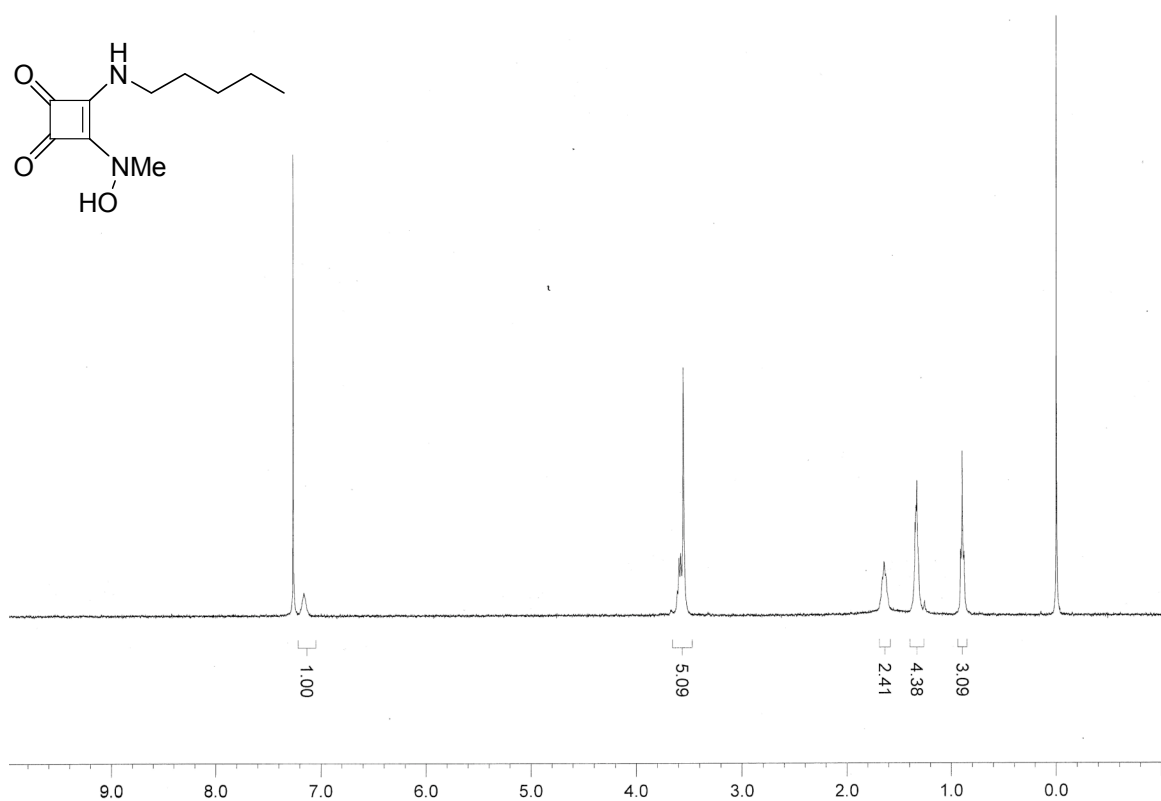

**Figure S11.** <sup>1</sup>H NMR spectrum of compound **4d**.

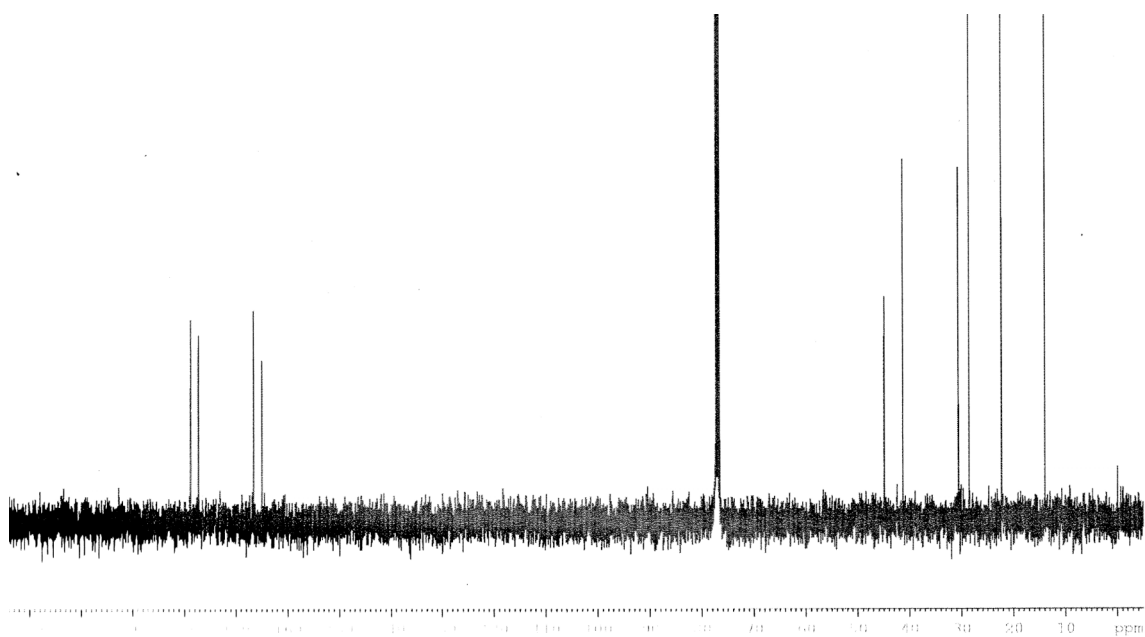

**Figure S12.** <sup>13</sup>C NMR spectrum of compound **4d**.

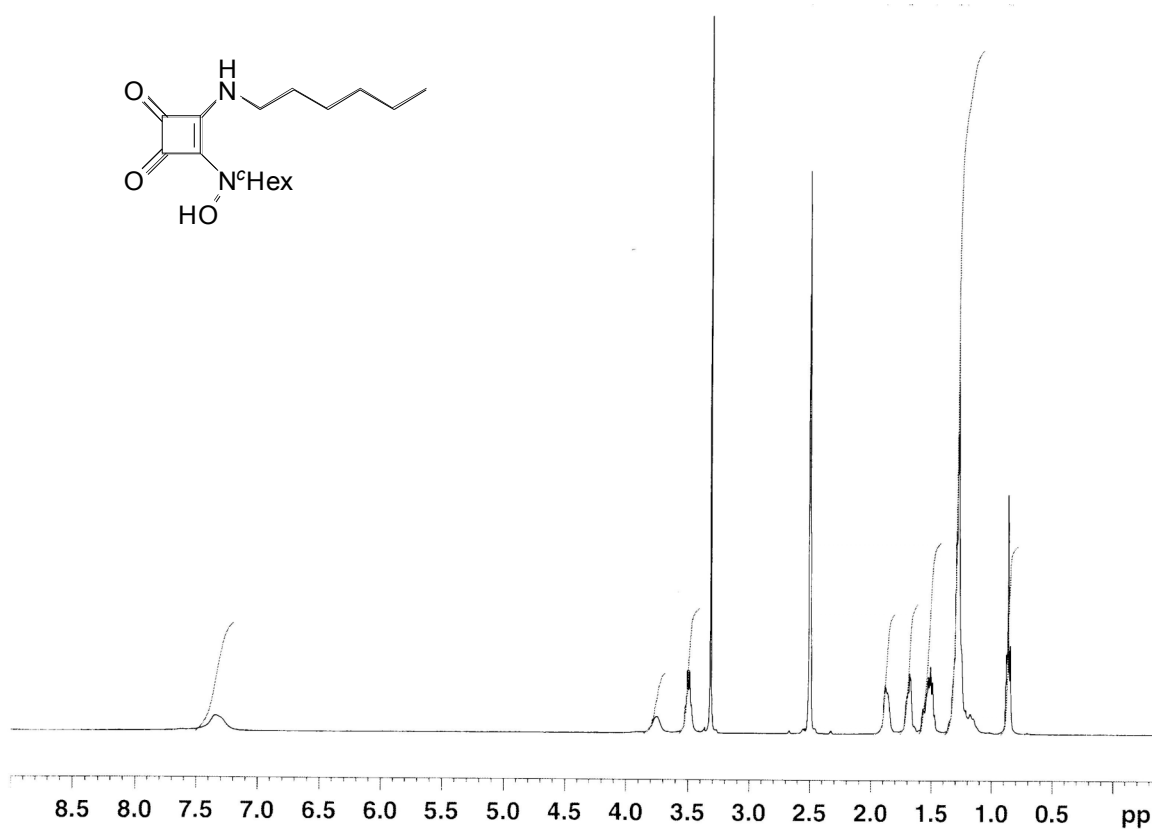

**Figure S13.**  $^1\text{H}$  NMR spectrum of compound **4e**.

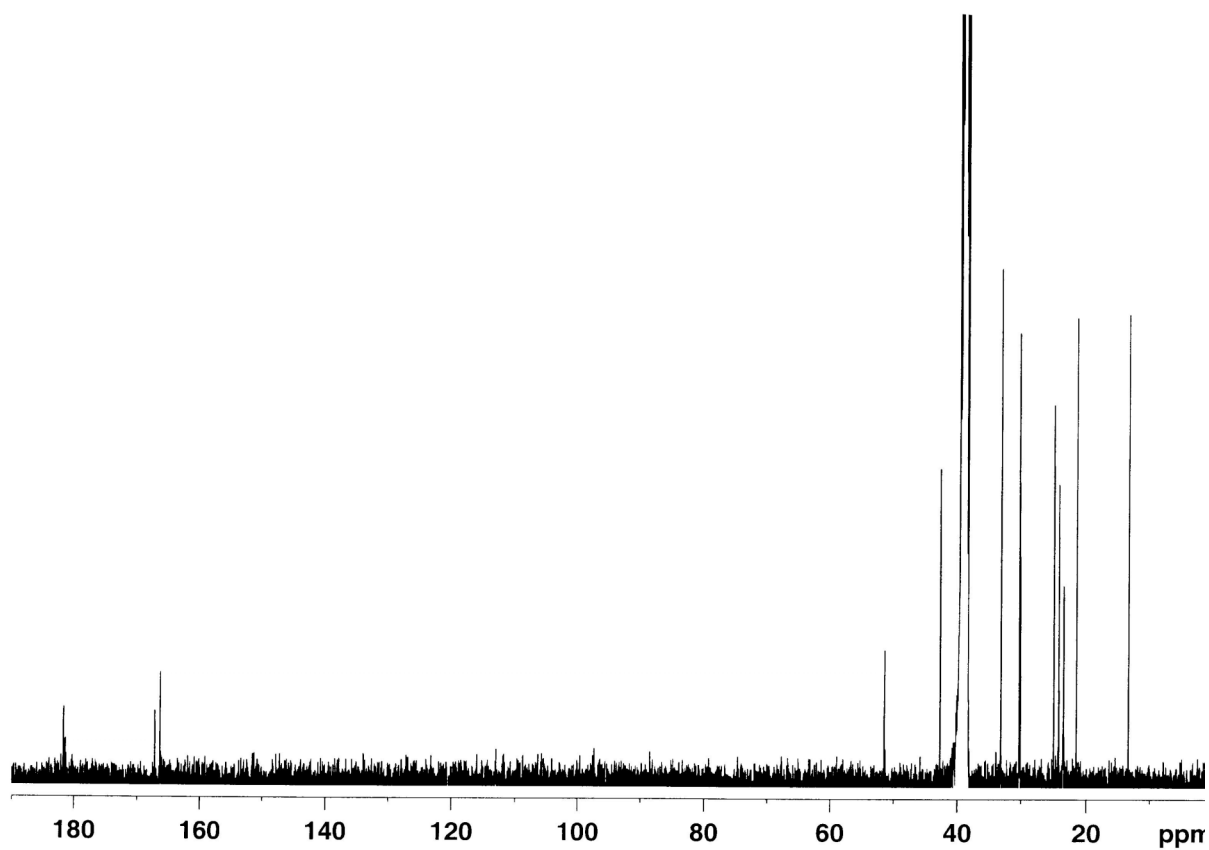

**Figure S14.**  $^{13}\text{C}$  NMR spectrum of compound **4e**.

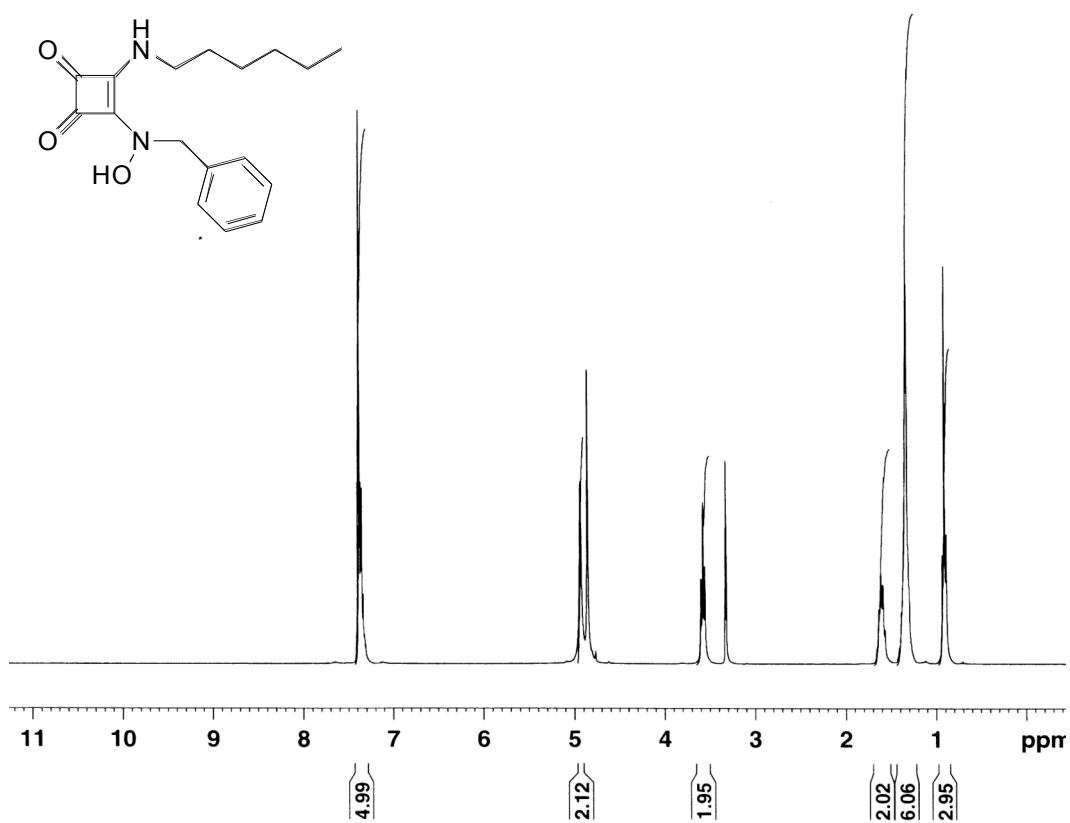

Figure S15. <sup>1</sup>H-NMR spectrum of compound **4f**.

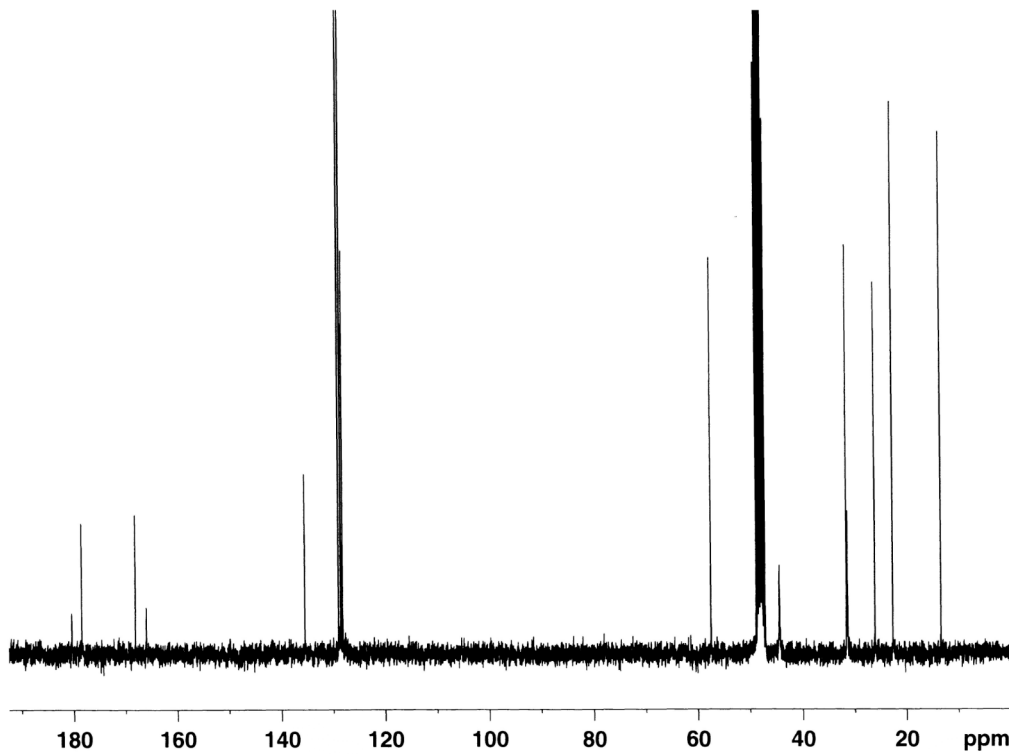

Figure S16. <sup>13</sup>C-NMR spectrum of compound **4f**.

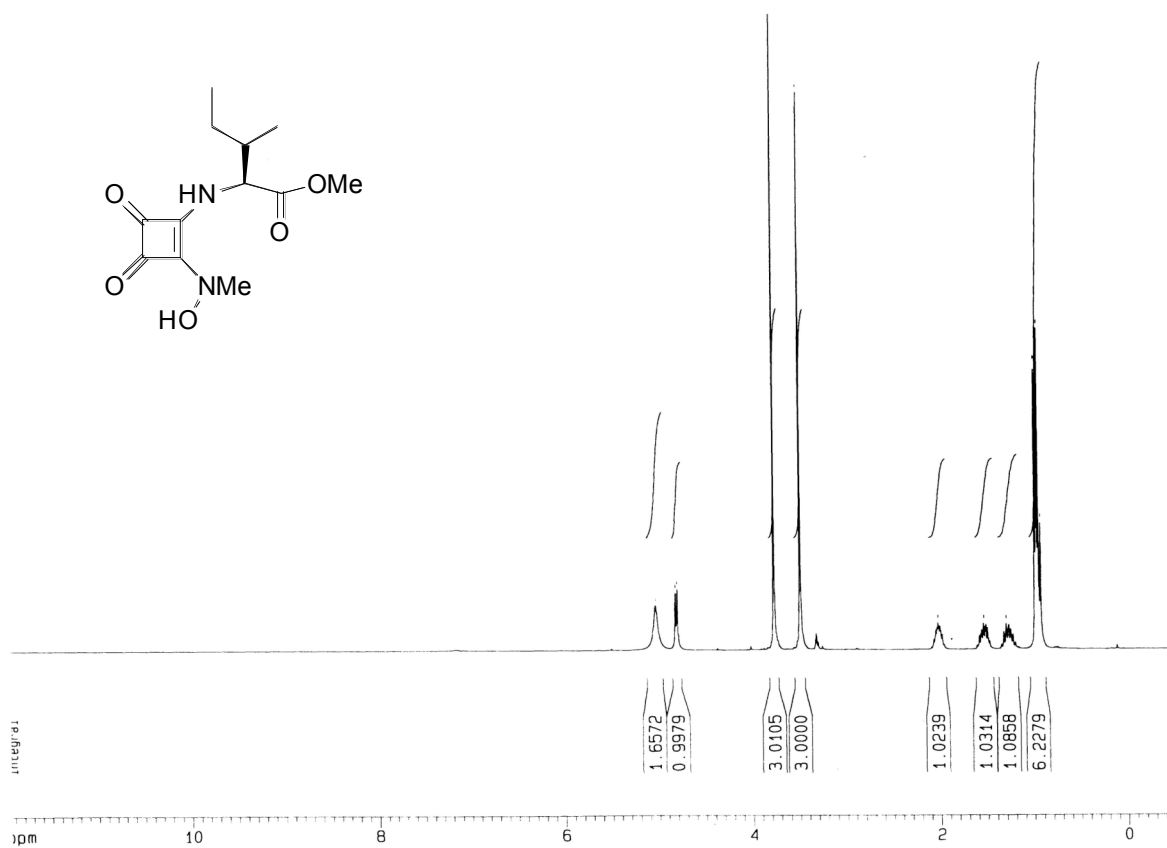

Figure S17. <sup>1</sup>H-NMR spectrum of compound **6a**.

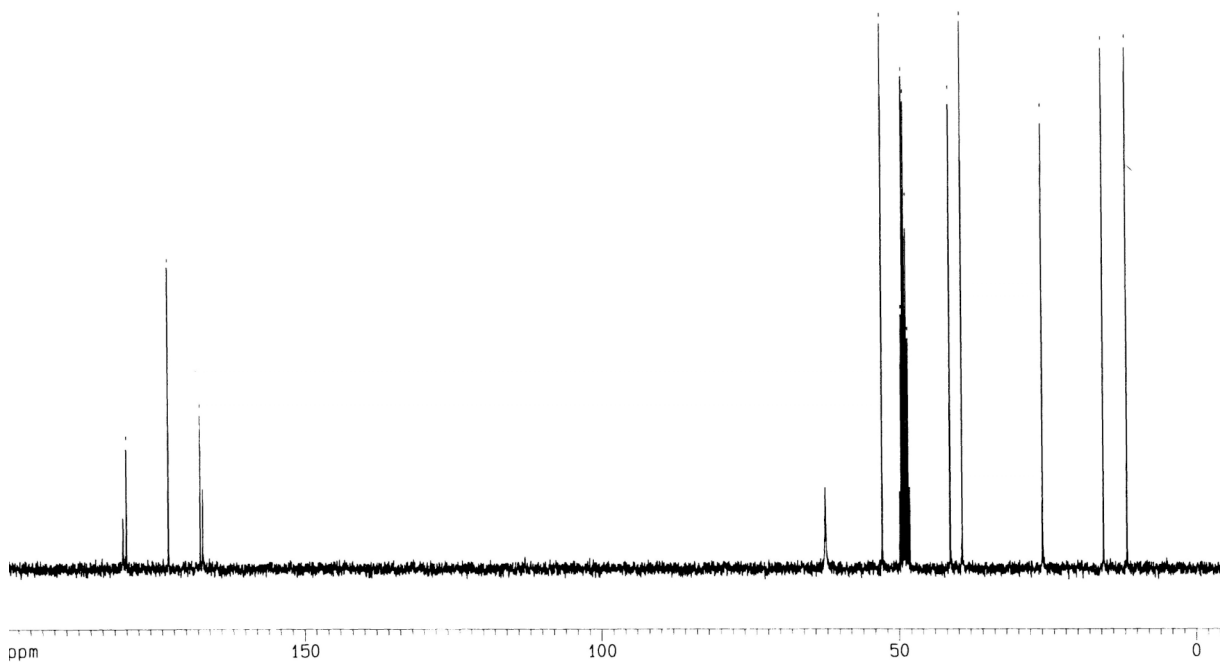

Figure S18. <sup>13</sup>C-NMR spectrum of compound **6a**.

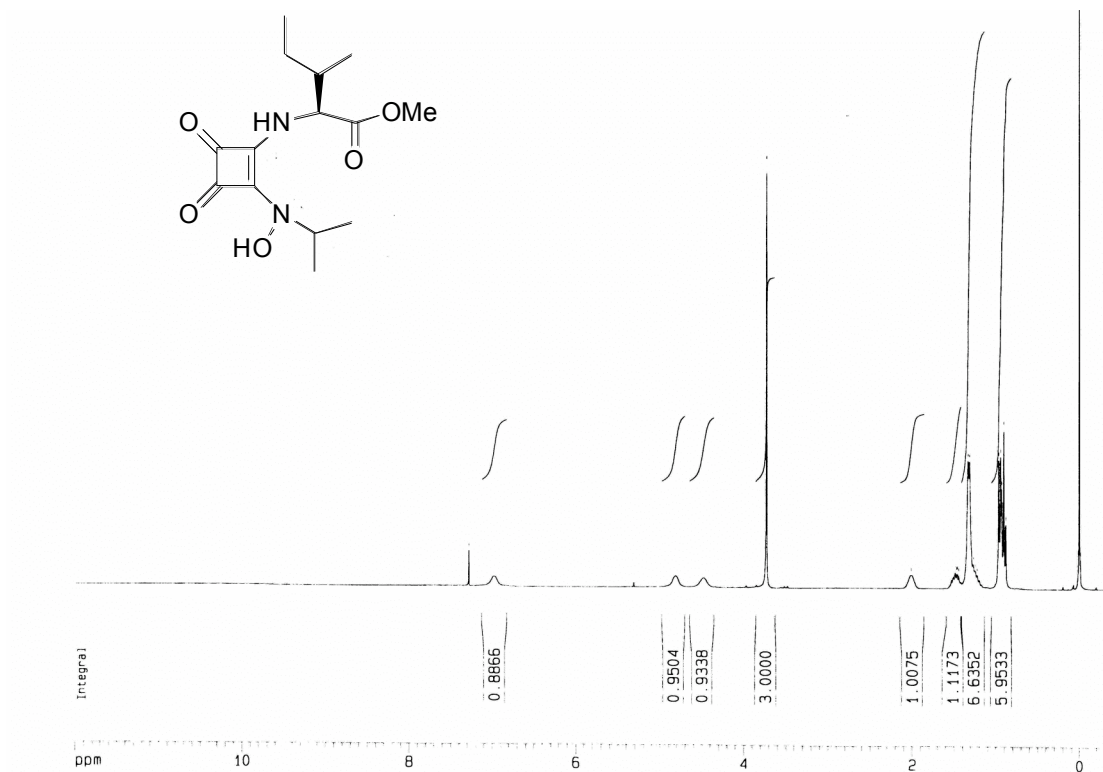

Figure S19. <sup>1</sup>H-NMR spectrum of compound **6b**.

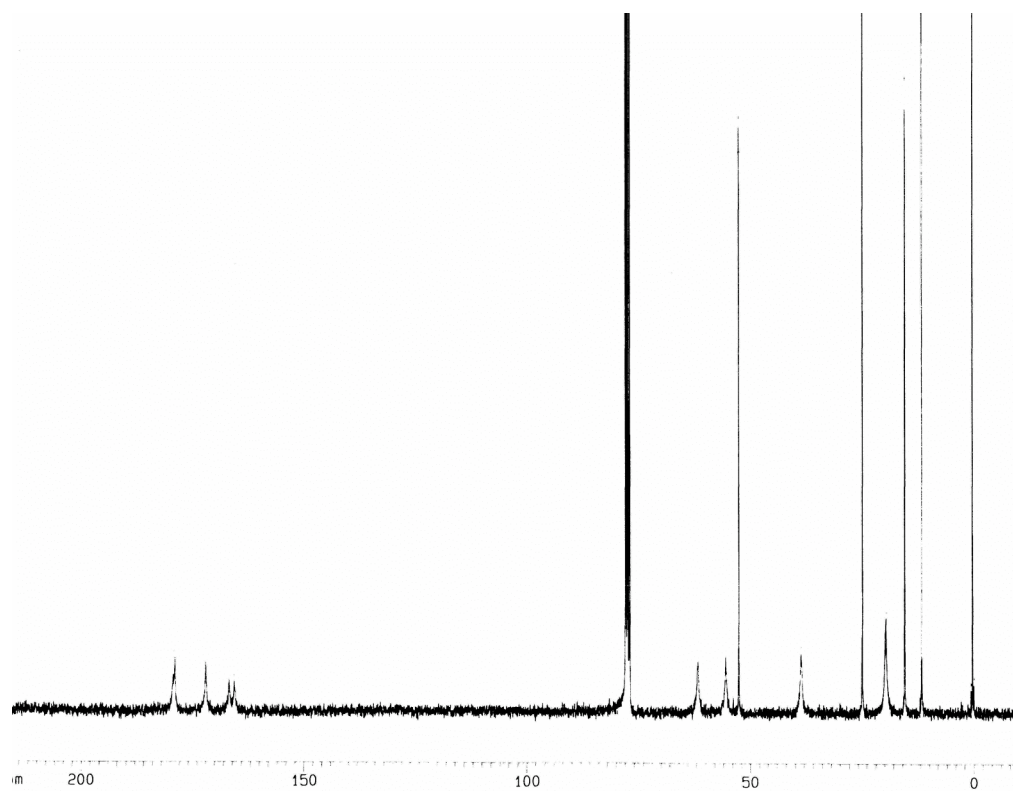

Figure S20. <sup>13</sup>C-NMR spectrum of compound **6b**.



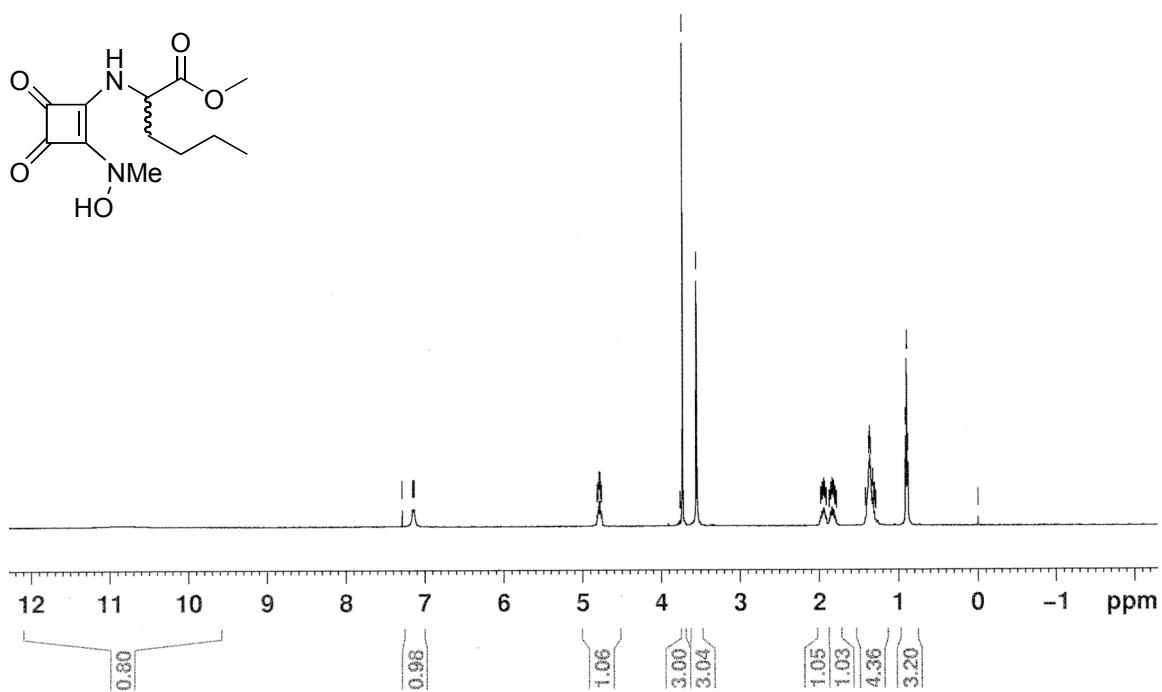

**Figure S21.** <sup>1</sup>H NMR spectrum of compound 6c.

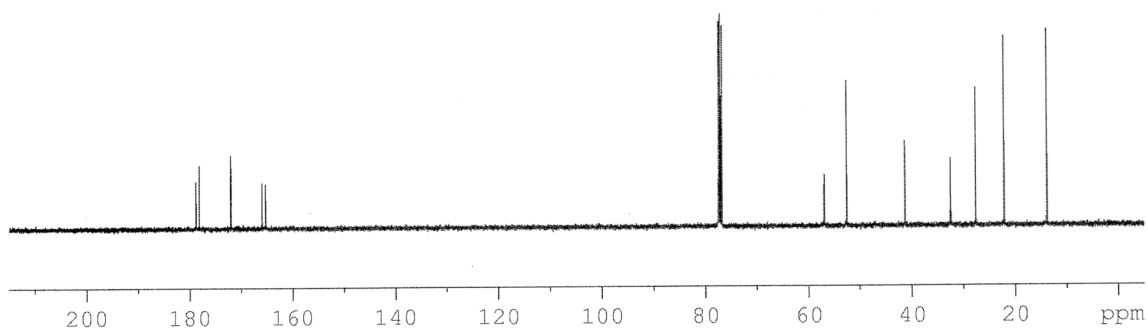

**Figure S22.** <sup>13</sup>C NMR spectrum of compound 6c.

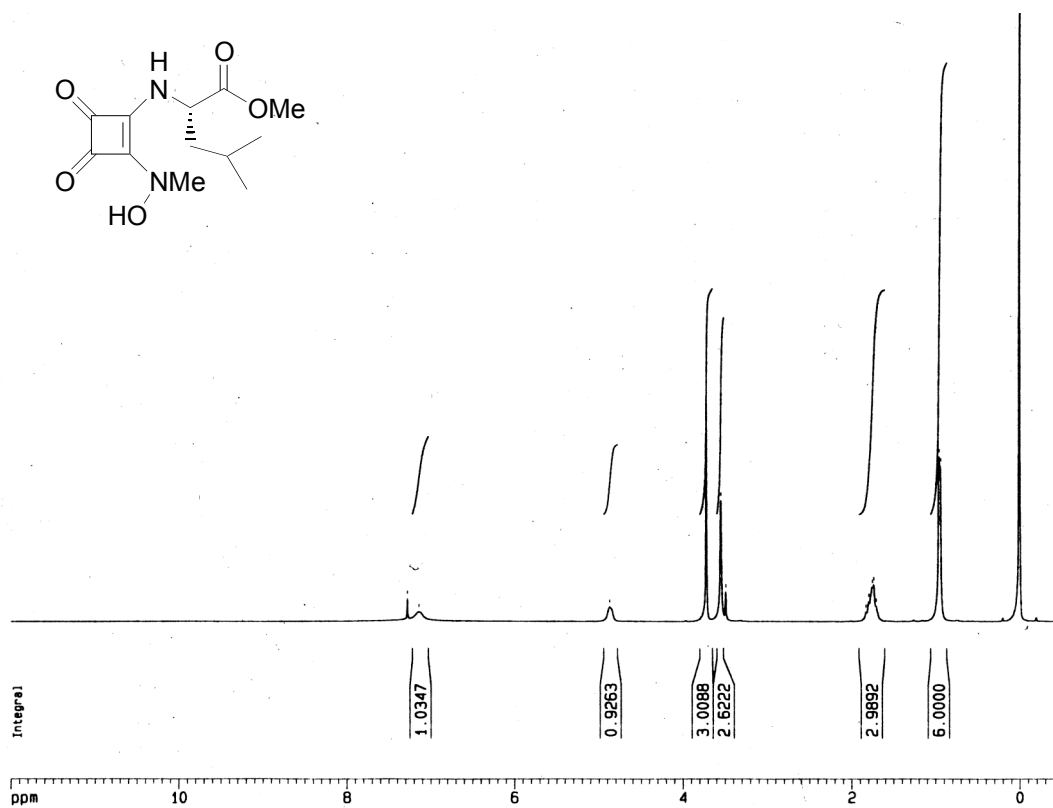

**Figure S23.** <sup>1</sup>H NMR spectrum of compound **6d**.

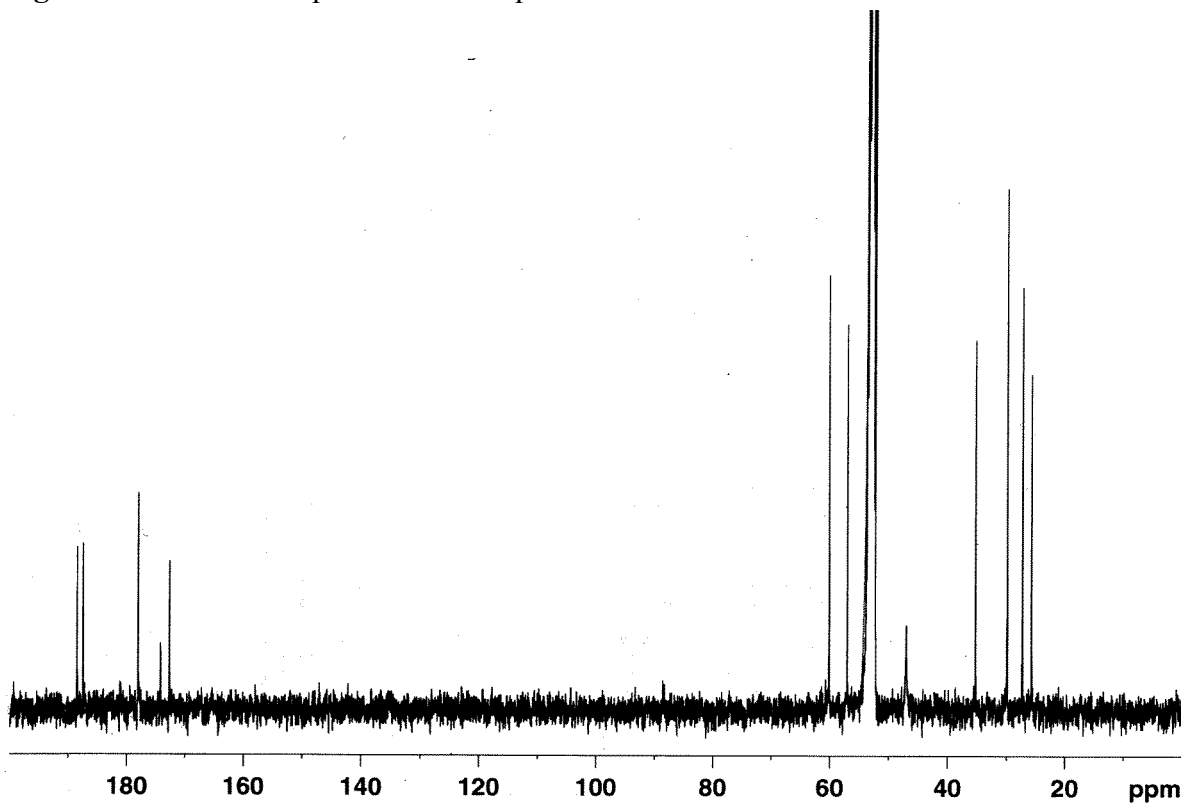

**Figure S24.** <sup>13</sup>C NMR spectrum of compound **6d**.

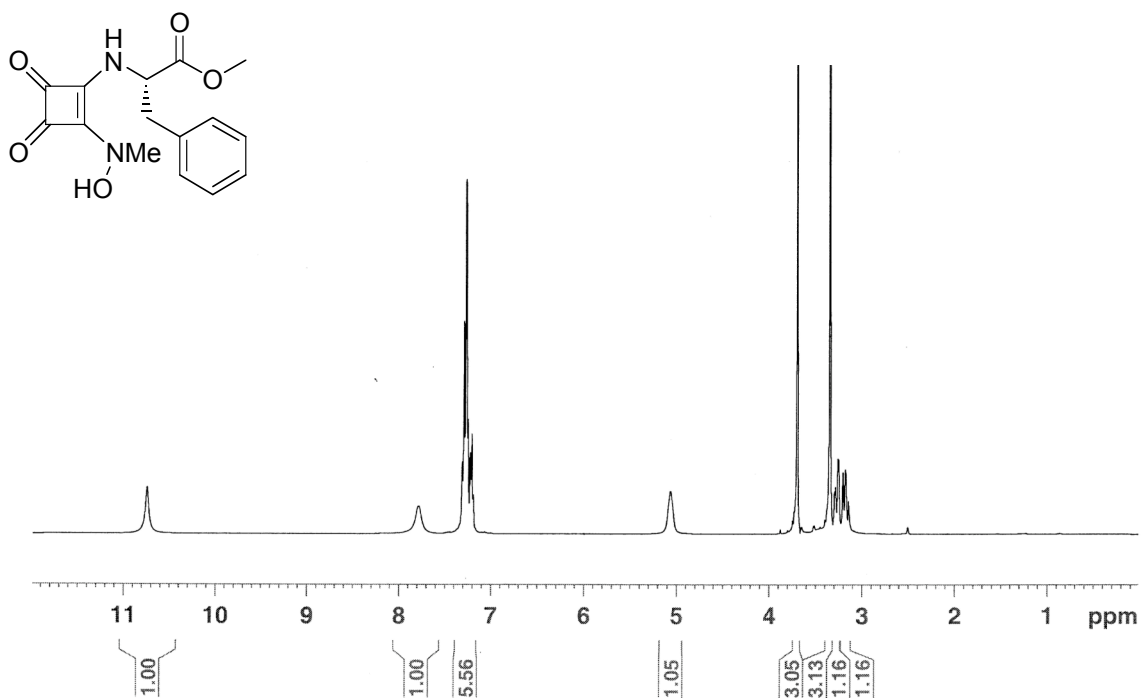

**Figure S25.** <sup>1</sup>H NMR spectrum of compound **6e**.

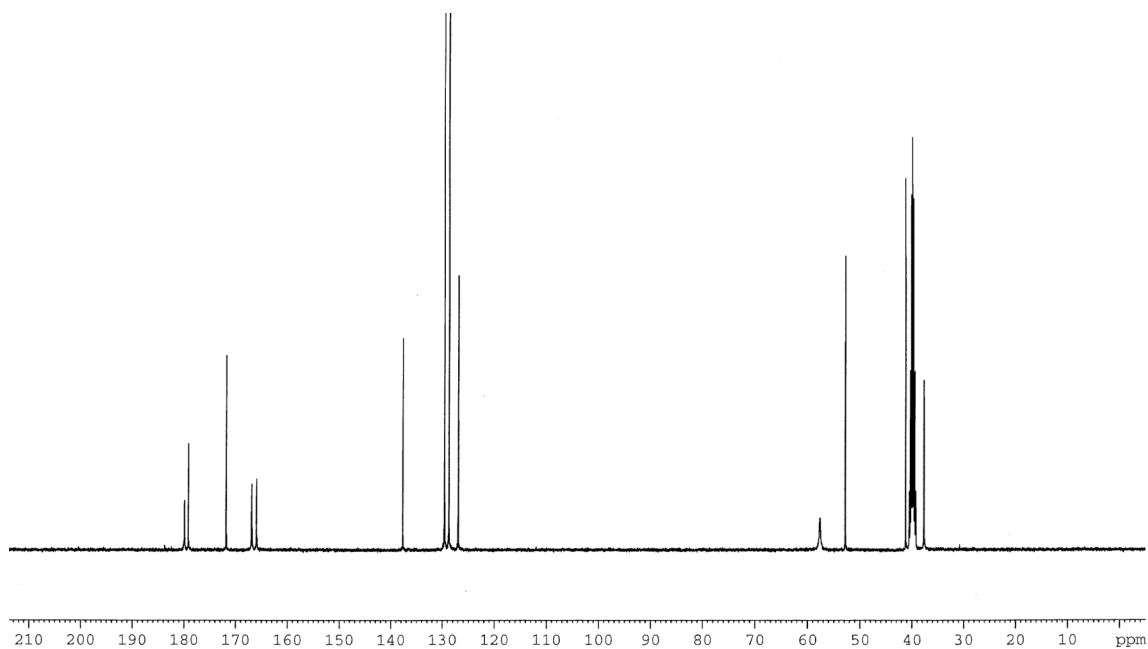

**Figure S26.** <sup>13</sup>C NMR spectrum of compound **6e**.

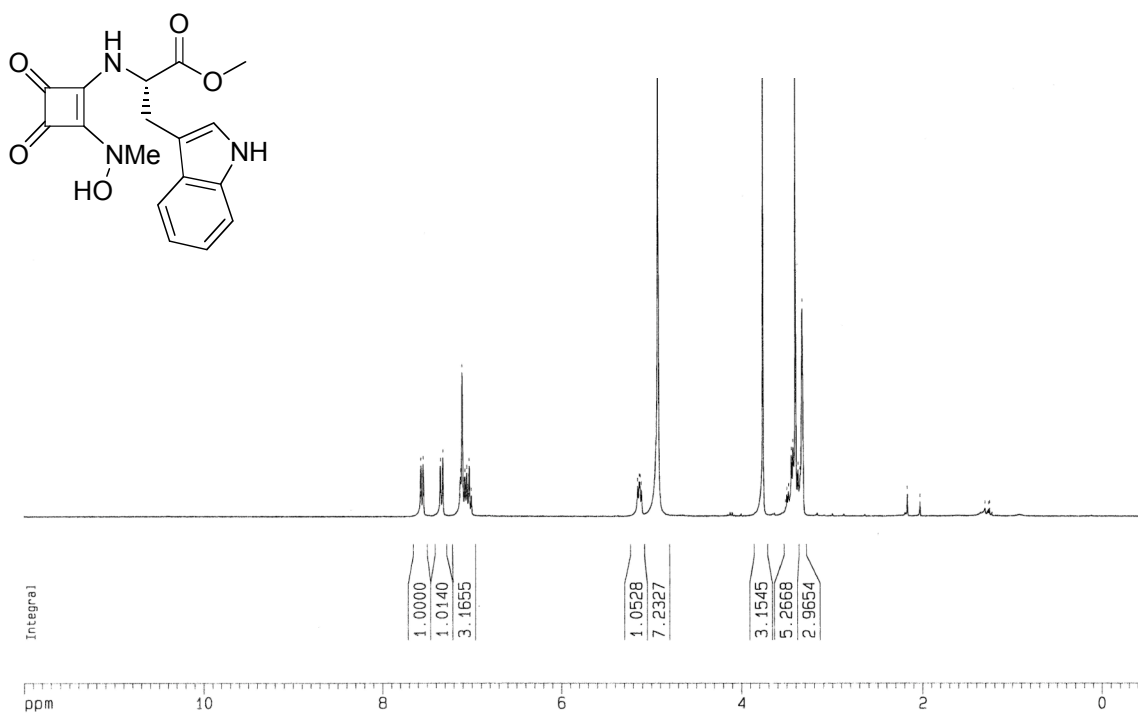

**Figure S27.** <sup>1</sup>H NMR spectrum of compound **6f**.

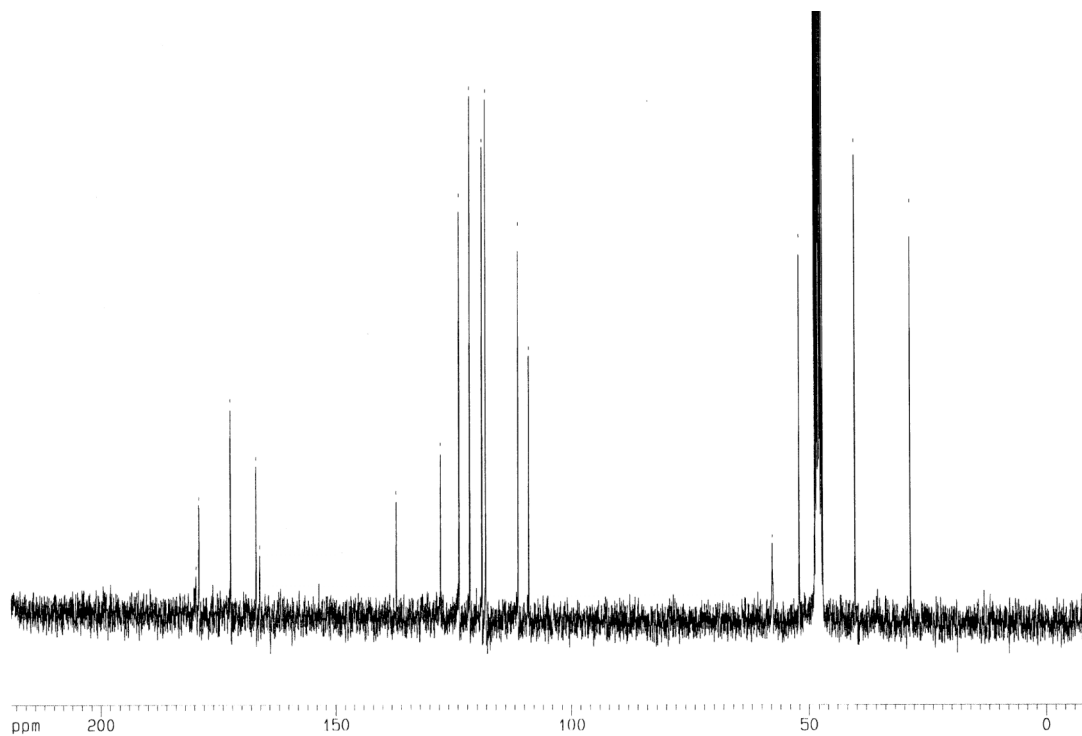

**Figure S28.** <sup>13</sup>C NMR spectrum of compound **6f**.

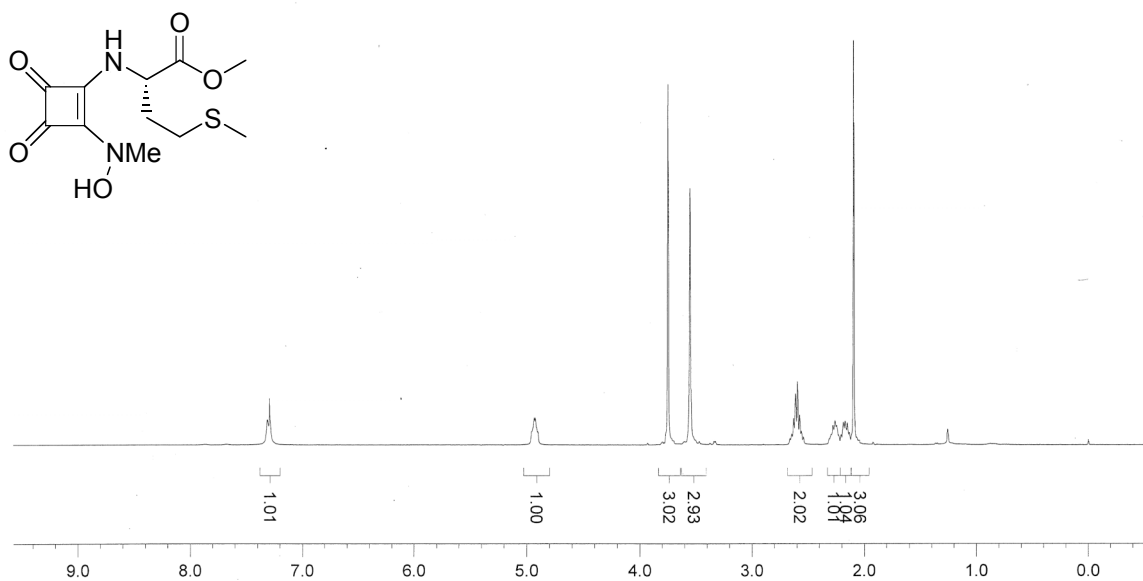

**Figure S29.** <sup>1</sup>H NMR spectrum of compound **6g**.

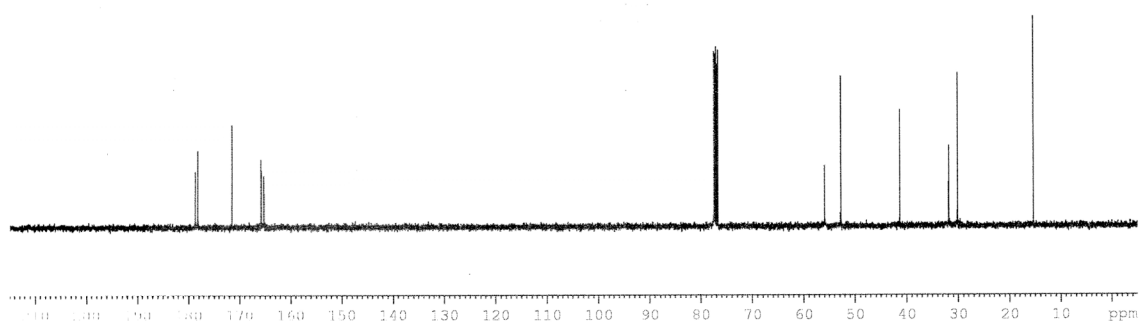

**Figure S30.** <sup>13</sup>C NMR spectrum of compound **6g**.

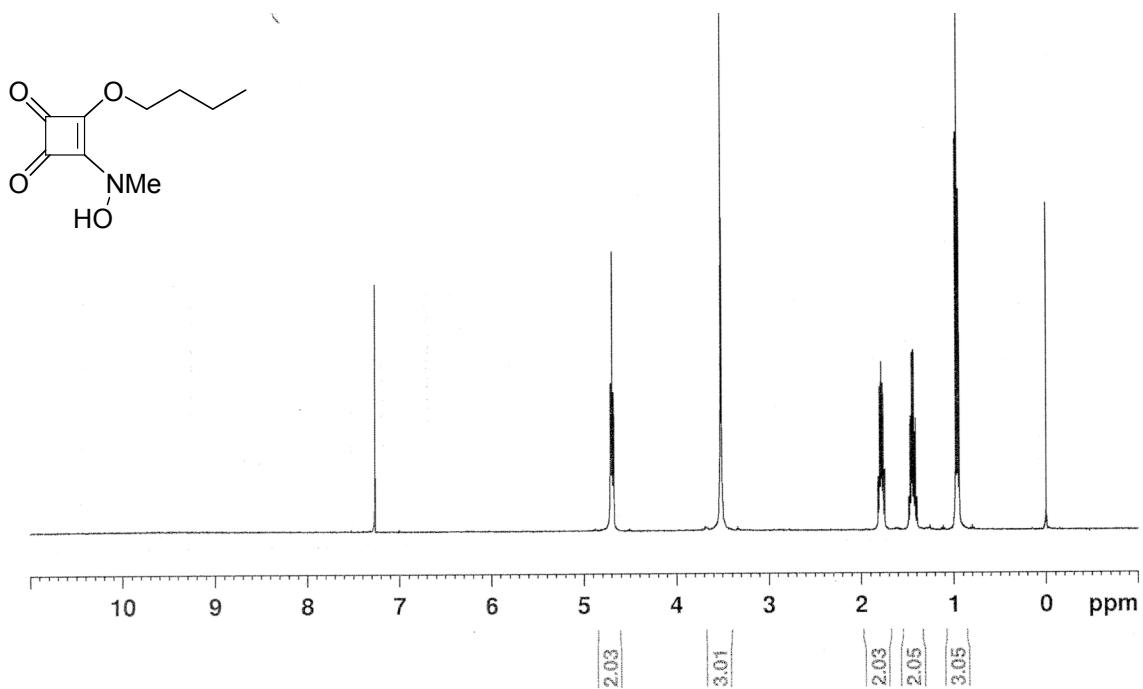

**Figure S31.**  $^1\text{H}$  NMR spectrum of compound 8.

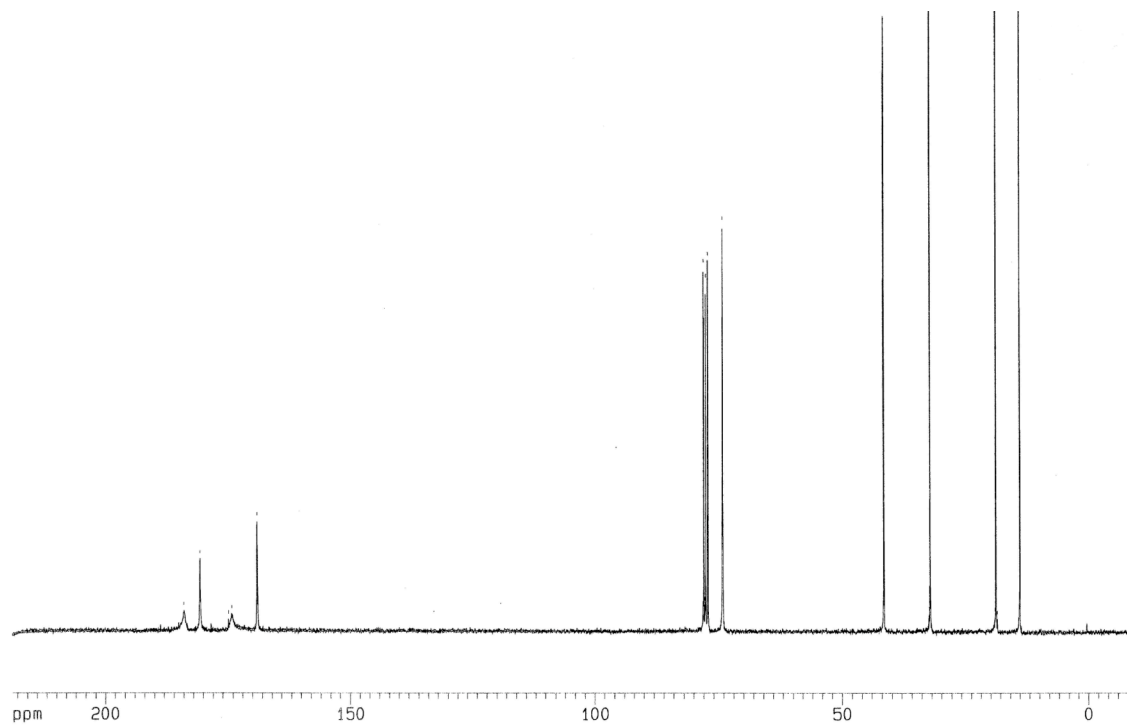

**Figure S32.**  $^{13}\text{C}$  NMR spectrum of compound 8.

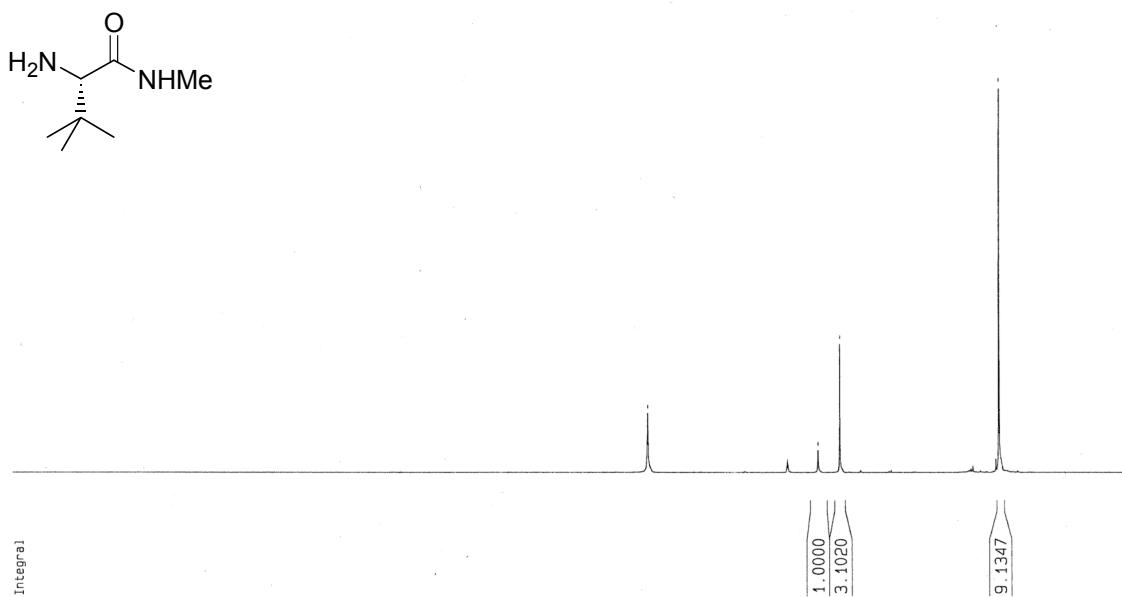

**Figure S33.** <sup>1</sup>H NMR spectrum of compound 10a.

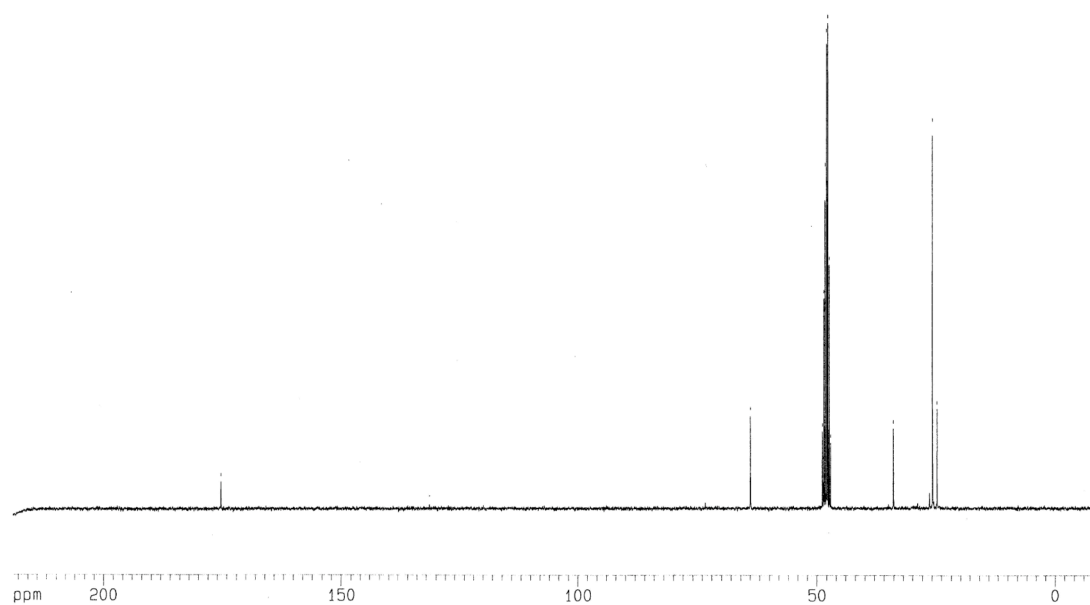

**Figure S34.** <sup>13</sup>C NMR spectrum of compound 10a.

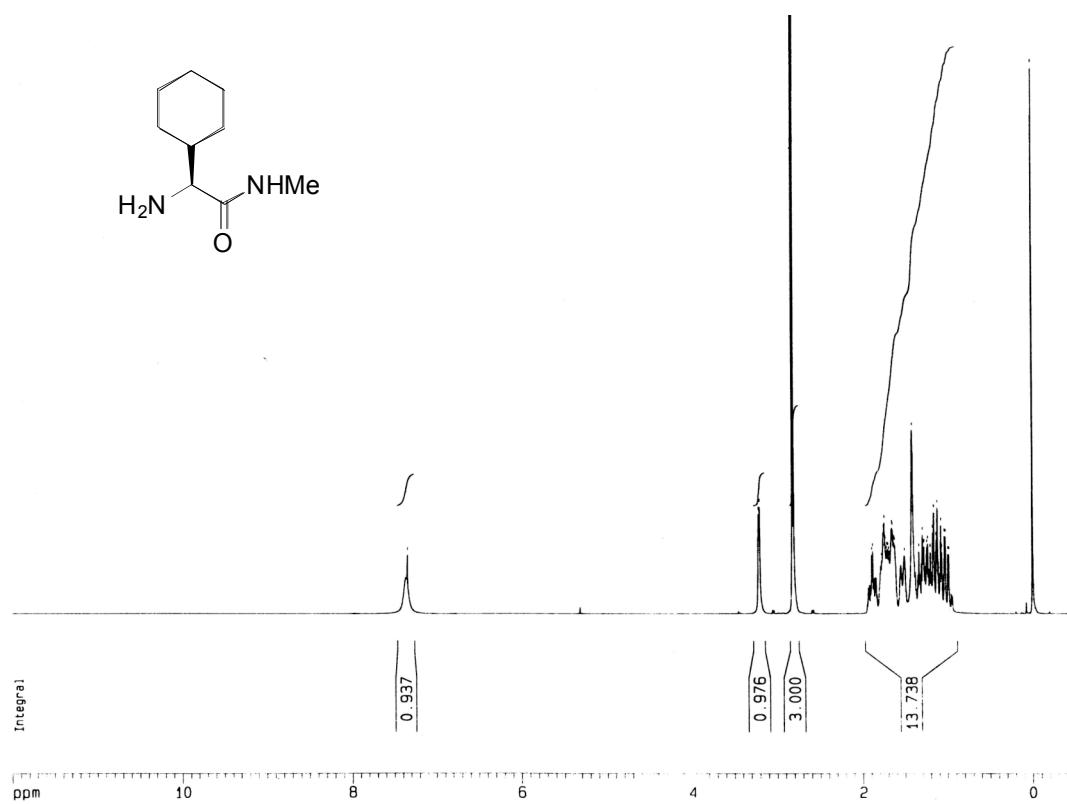

Figure S35. <sup>1</sup>H-NMR spectrum of compound **10b**.

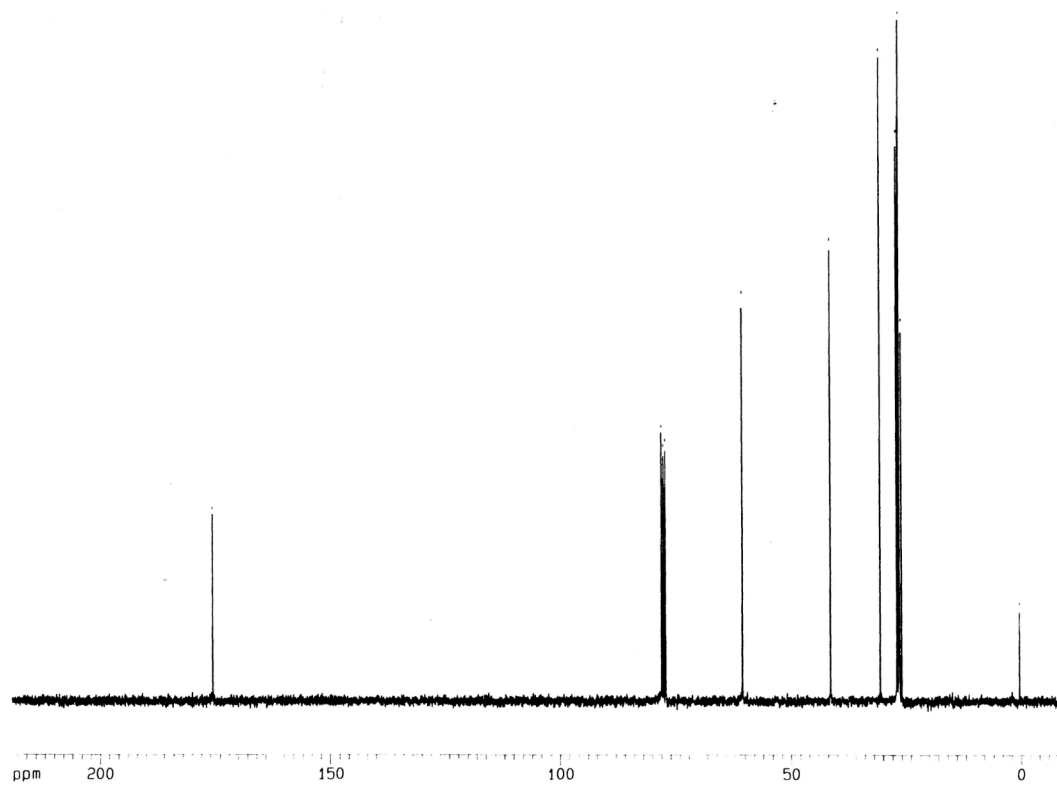

Figure S36. <sup>13</sup>C-NMR spectrum of compound **10b**.



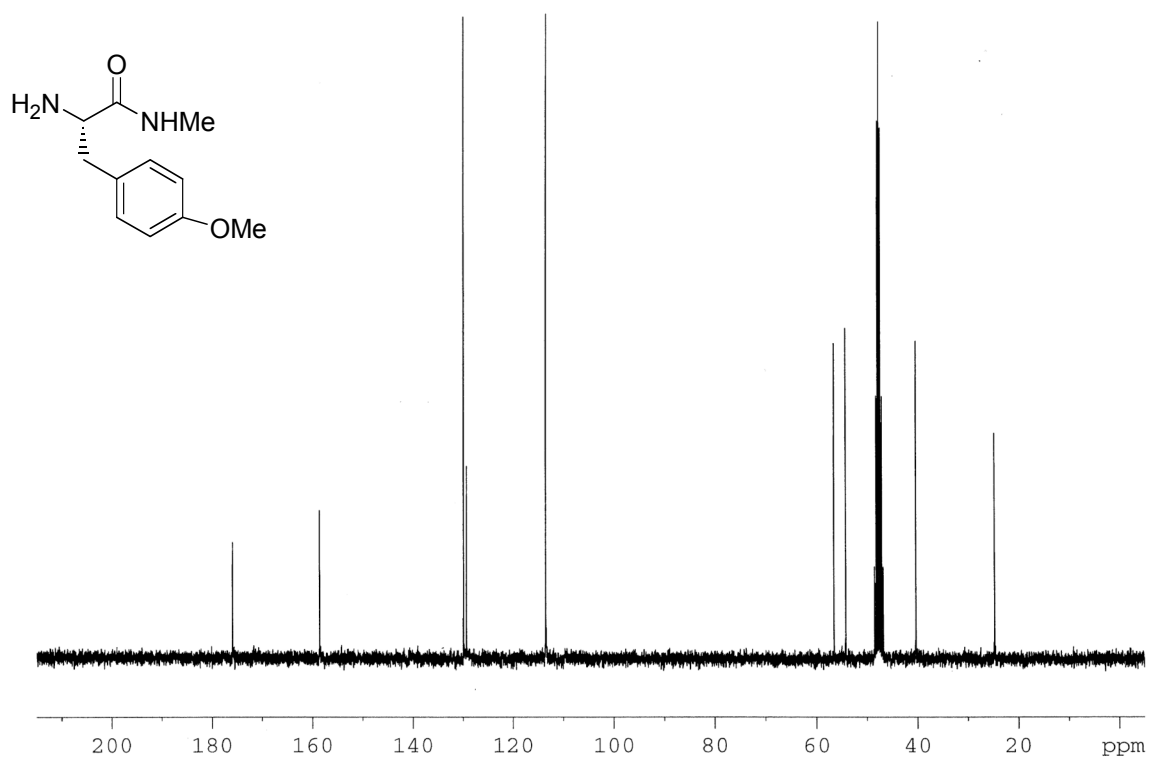

**Figure S37.**  $^{13}\text{C}$  NMR spectrum of compound **10c**.

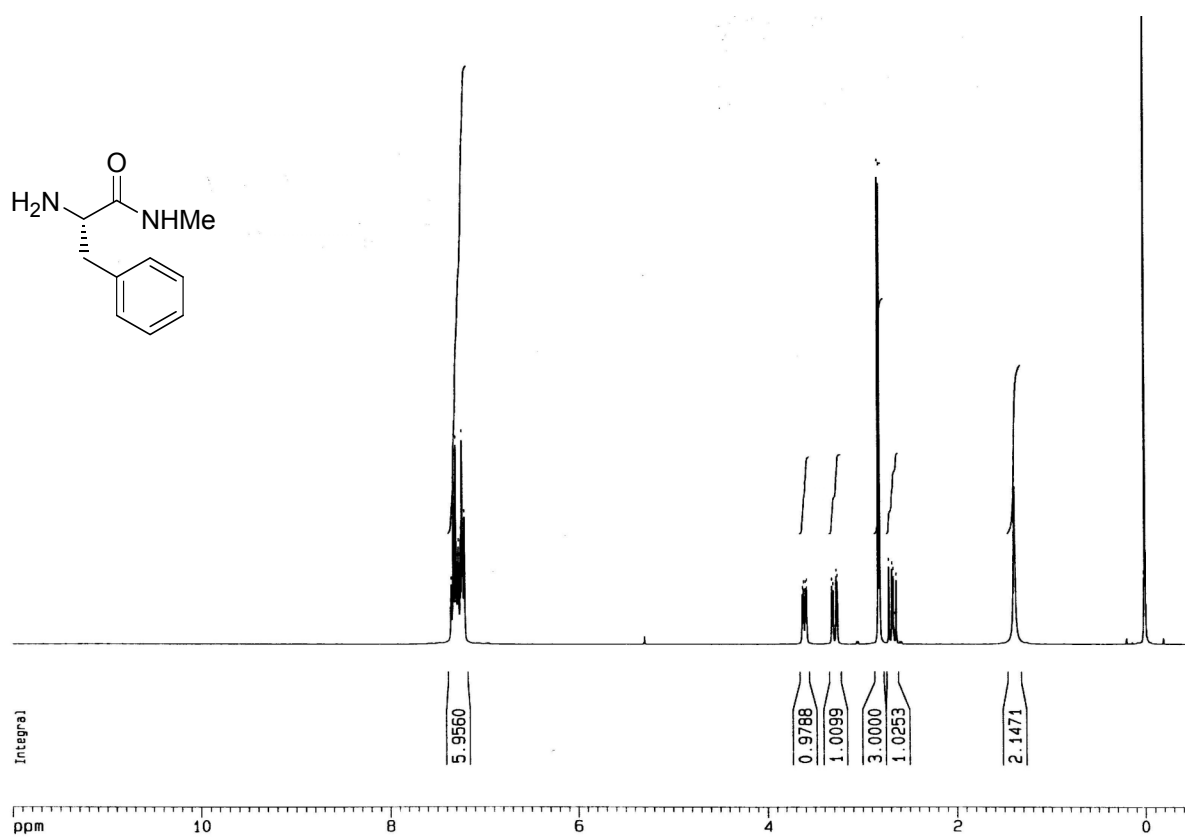

Figure S38. <sup>1</sup>H-NMR spectrum of compound **10d**.

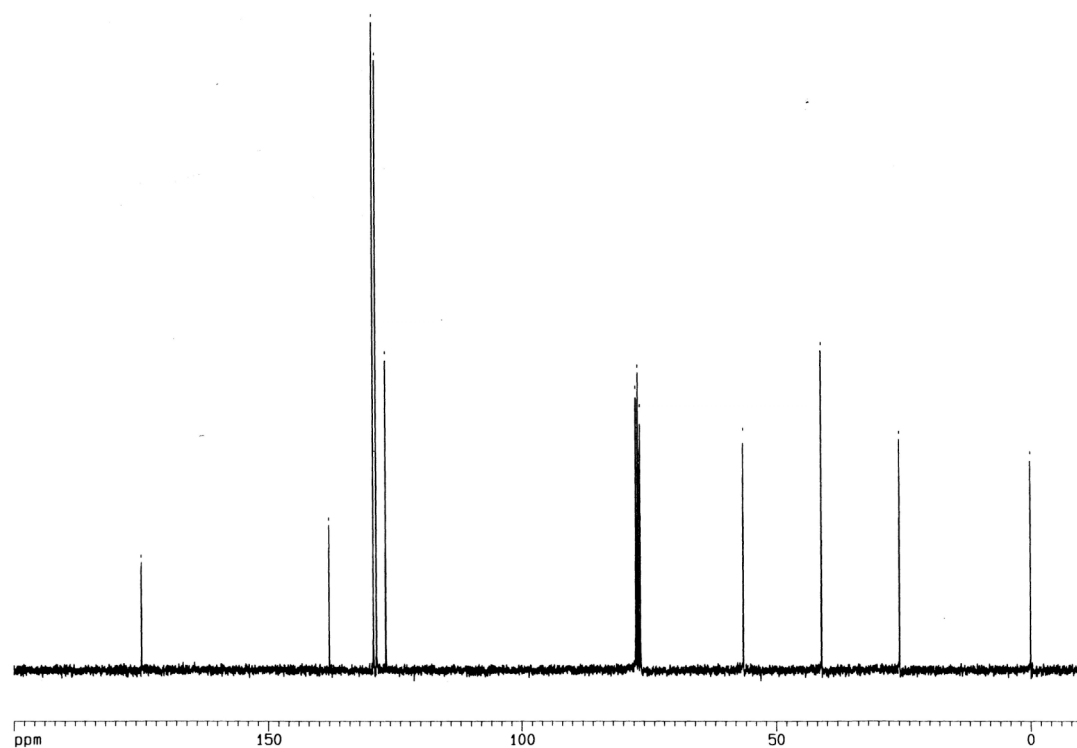

Figure S39. <sup>13</sup>C-NMR spectrum of compound **10d**.

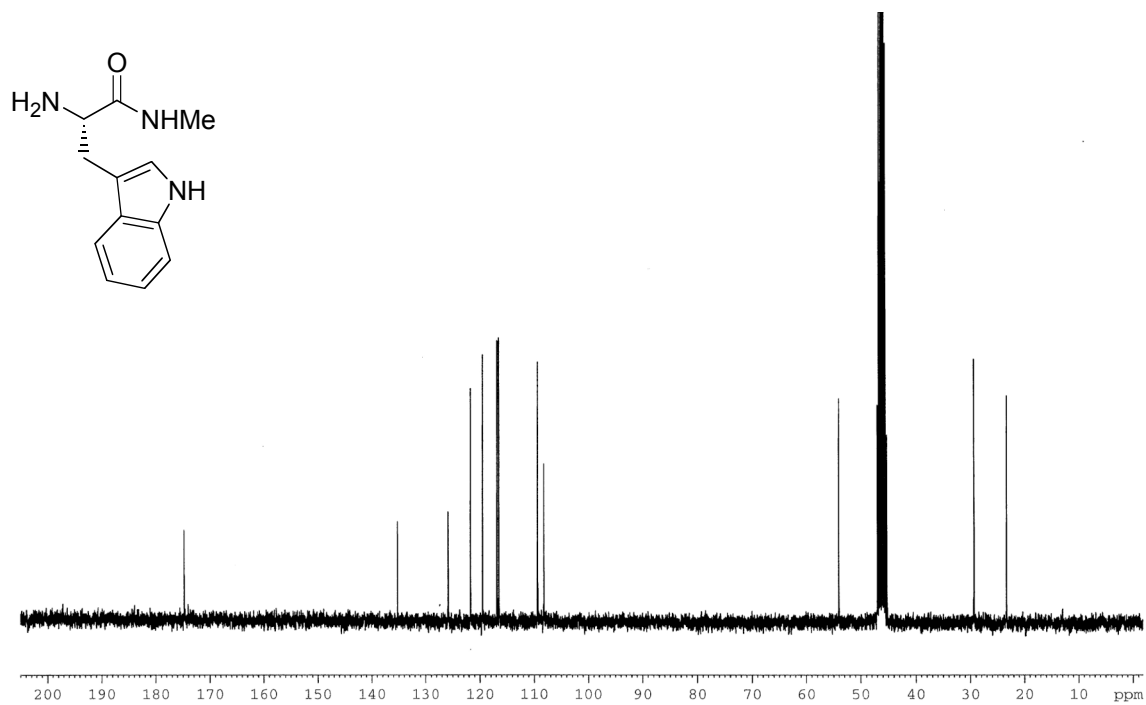

**Figure S40.**  $^{13}\text{C}$  NMR spectrum of compound **10f**.

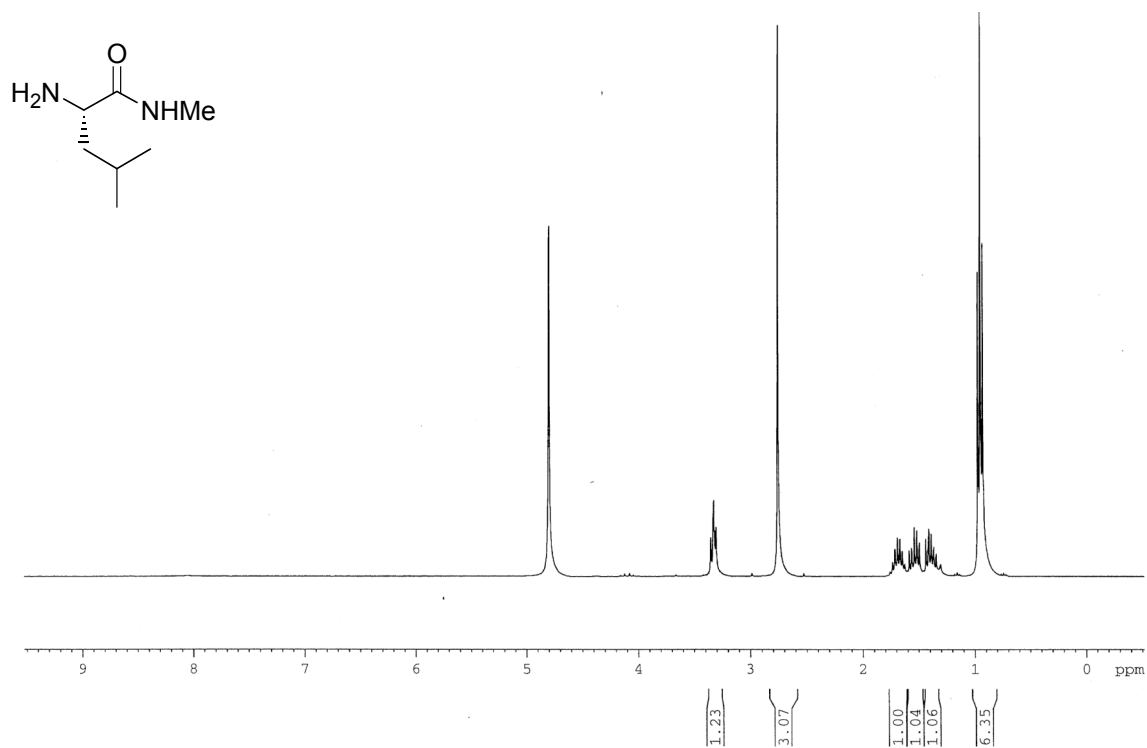

**Figure S41.**  $^1\text{H}$  NMR spectrum of compound **10g**.

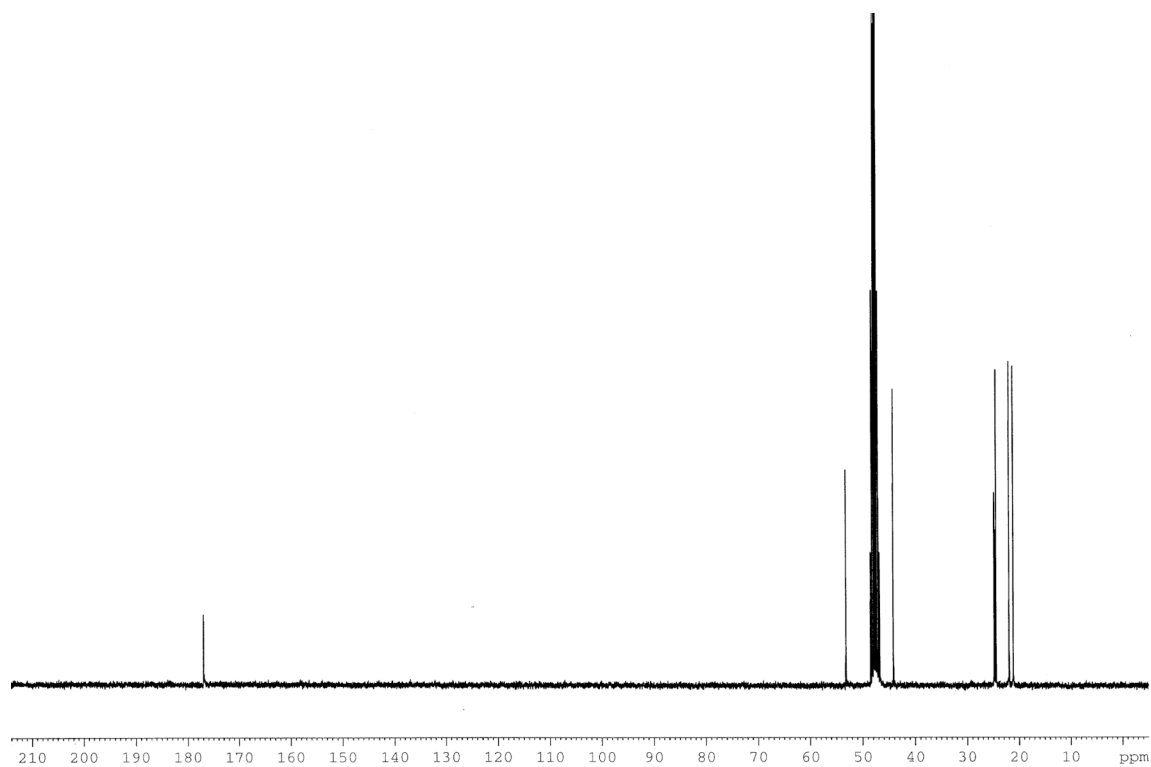

**Figure S42.**  $^{13}\text{C}$  NMR spectrum of compound **10g**.

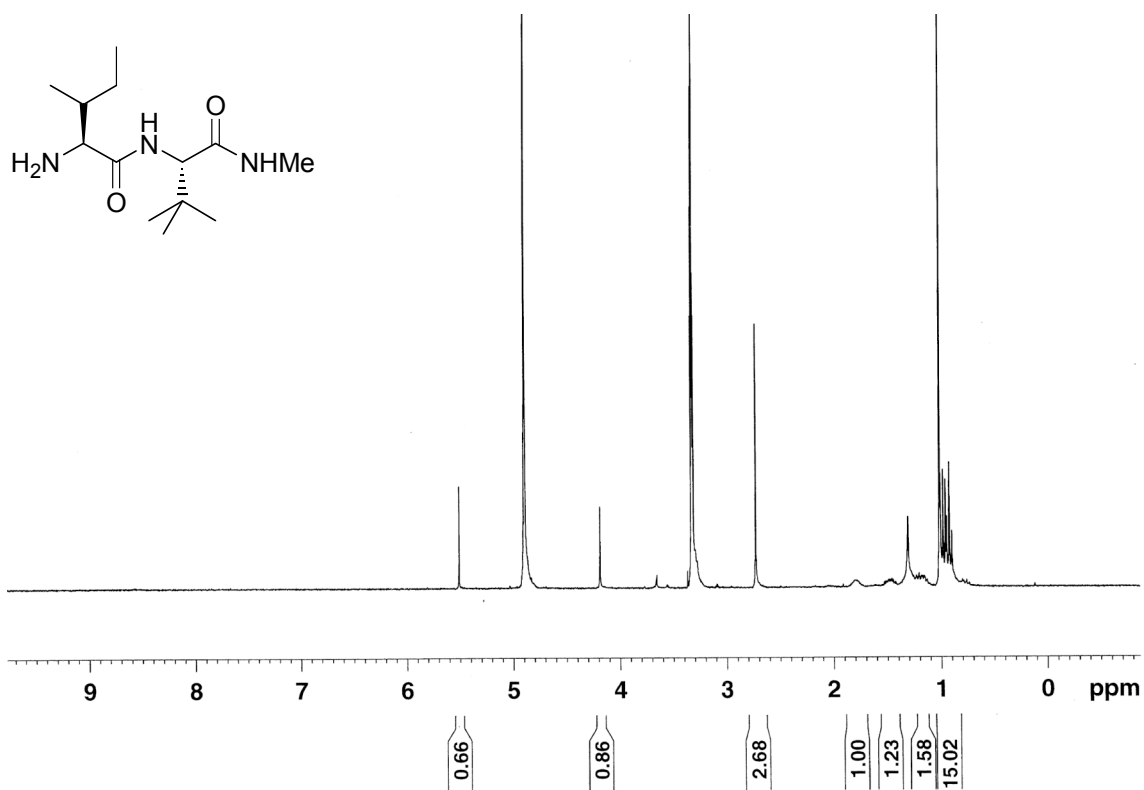

**Figure S43.** <sup>1</sup>H NMR spectrum of compound 11a.

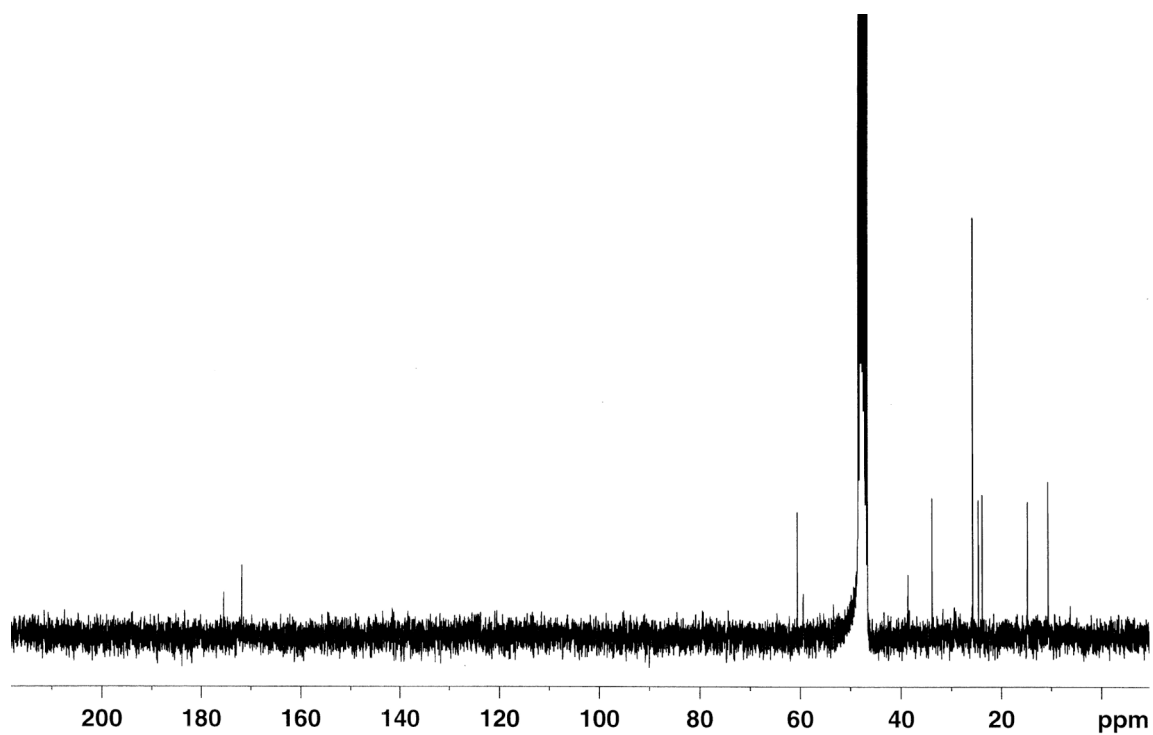

**Figure S44.** <sup>13</sup>C NMR spectrum of compound 11a.

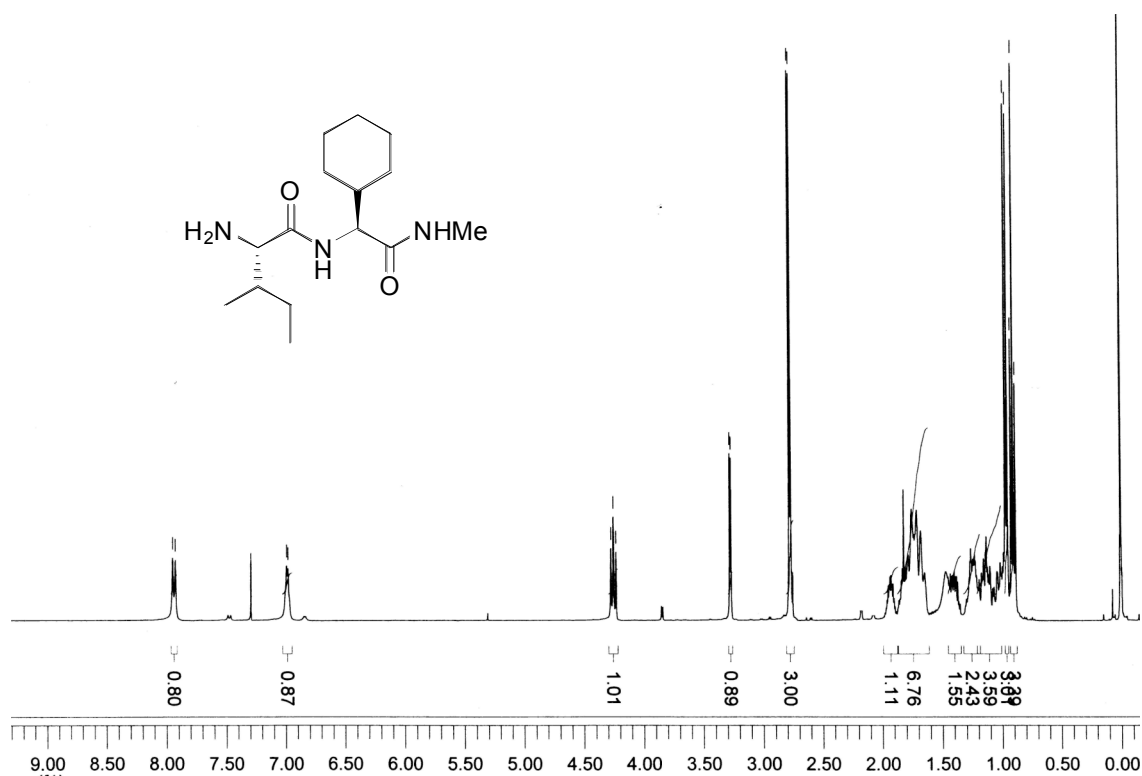

Figure S45. <sup>1</sup>H-NMR spectrum of compound **11b**.

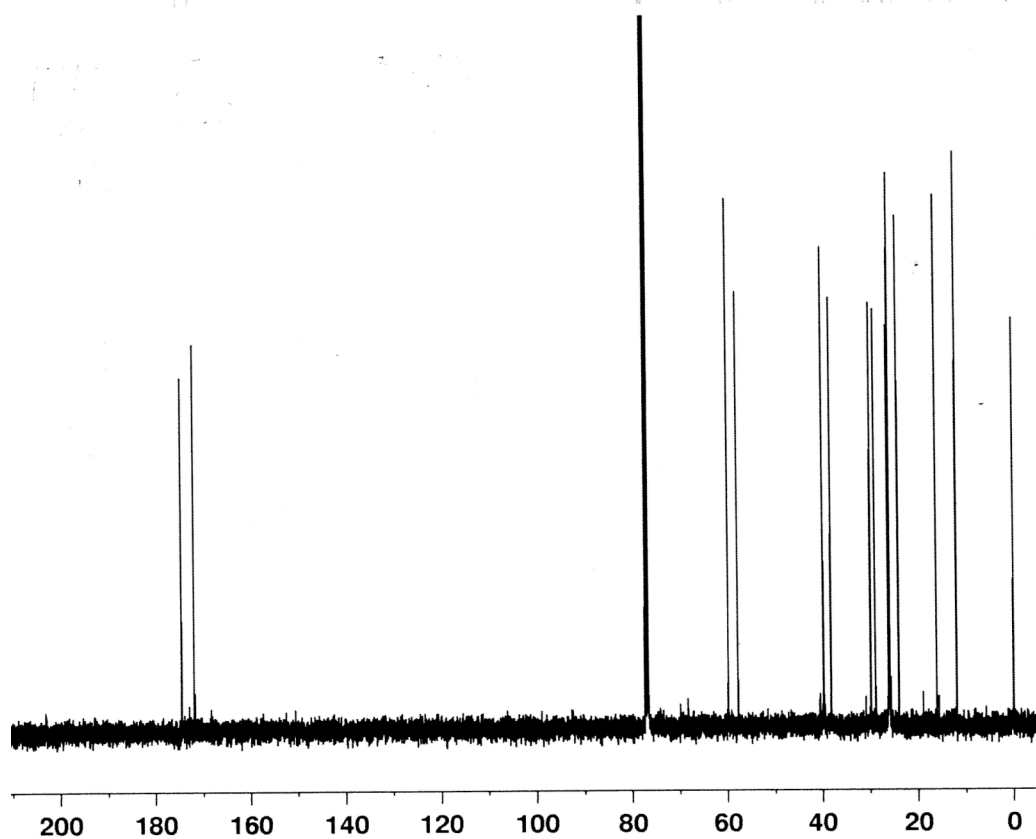

Figure S46. <sup>13</sup>C-NMR spectrum of compound **11b**.

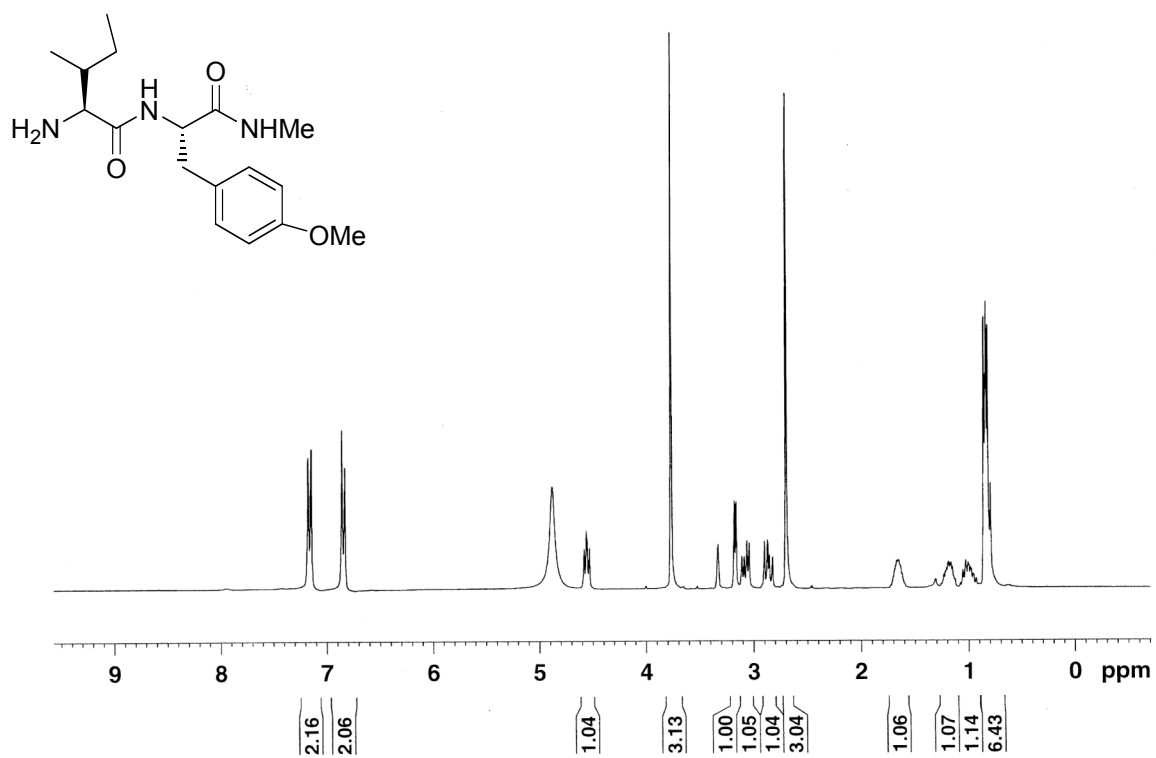

**Figure S47.** <sup>1</sup>H NMR spectrum of compound **11c**.

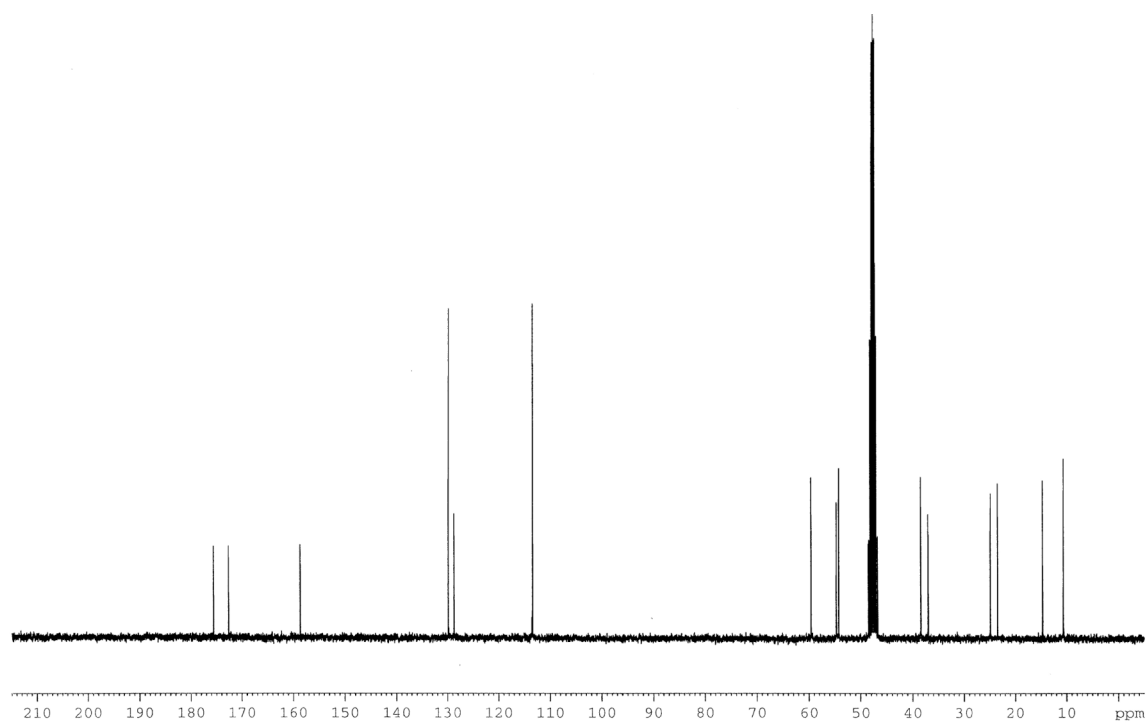

**Figure S48.** <sup>13</sup>C NMR spectrum of compound **11c**.

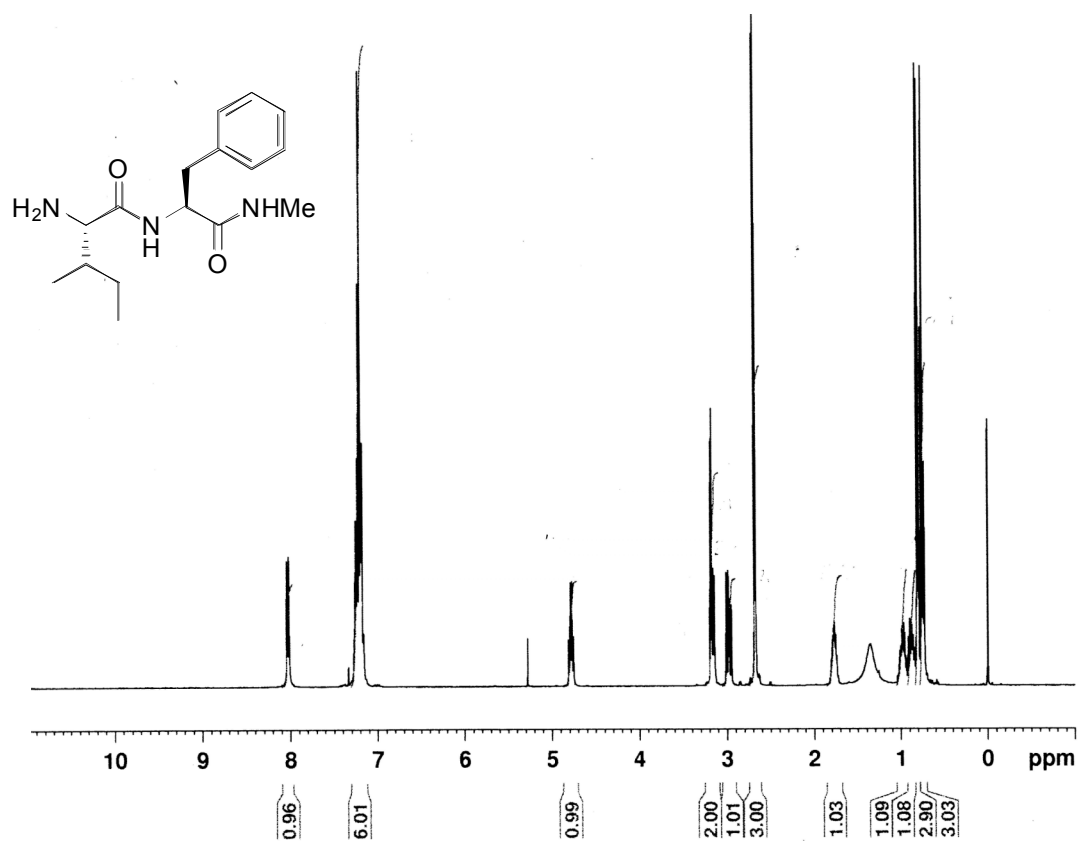

Figure S49. <sup>1</sup>H-NMR spectrum of compound **11d**.

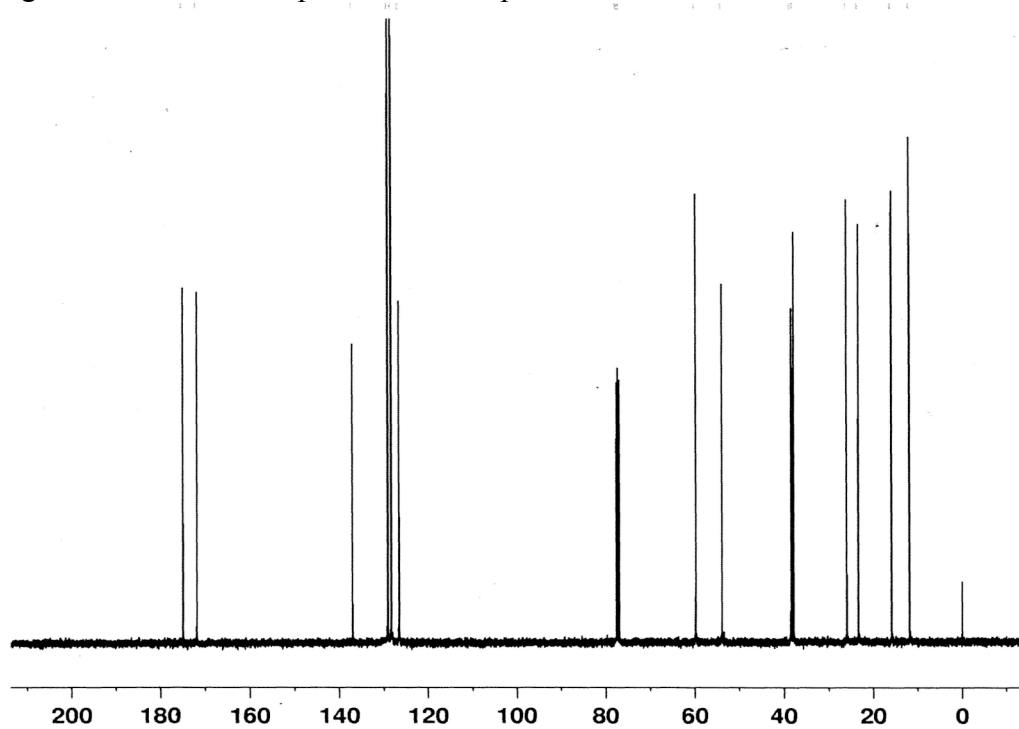

Figure S50. <sup>13</sup>C-NMR spectrum of compound **11d**.



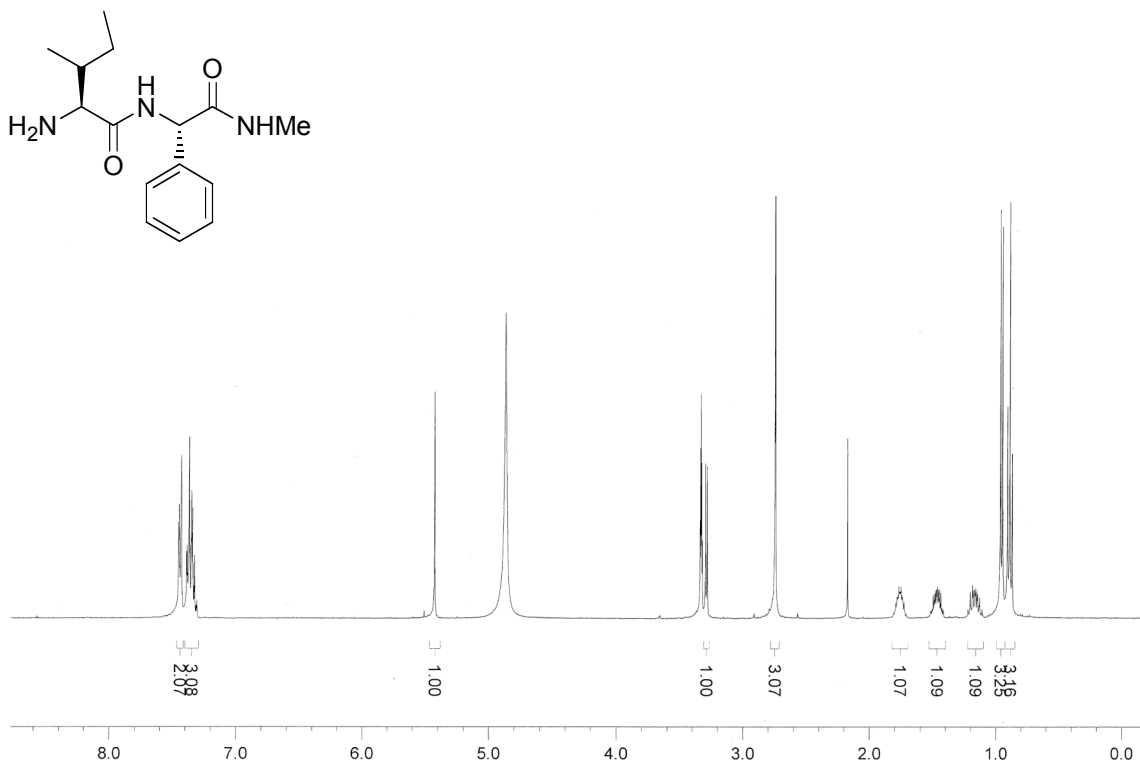

**Figure S51.** <sup>1</sup>H NMR spectrum of compound **11e**.

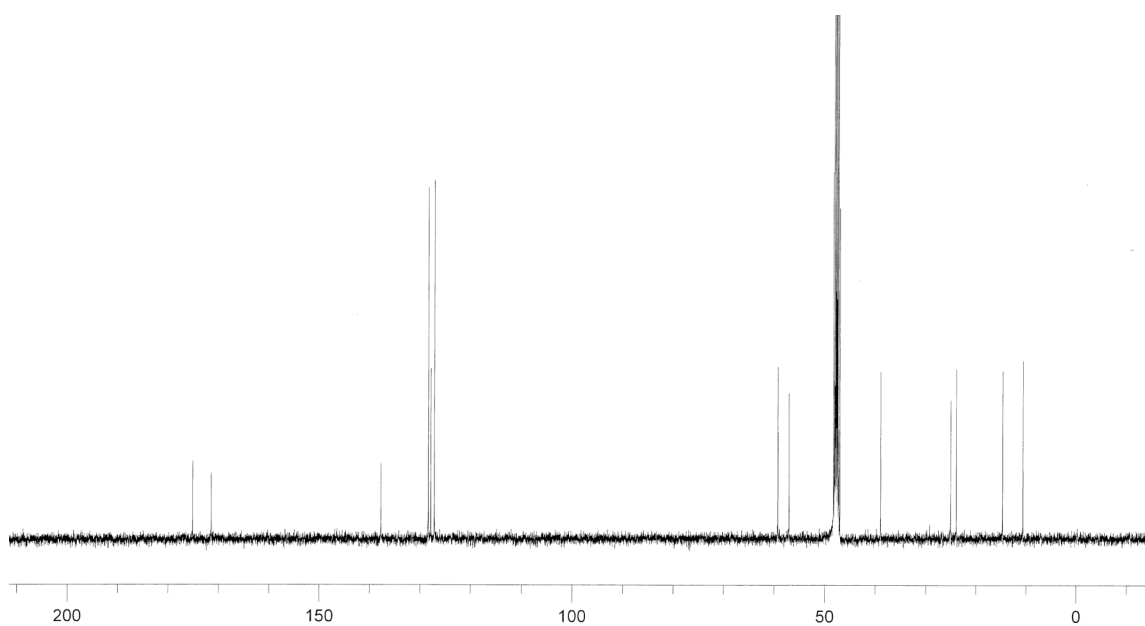

**Figure S52.** <sup>13</sup>C NMR spectrum of compound **11e**.

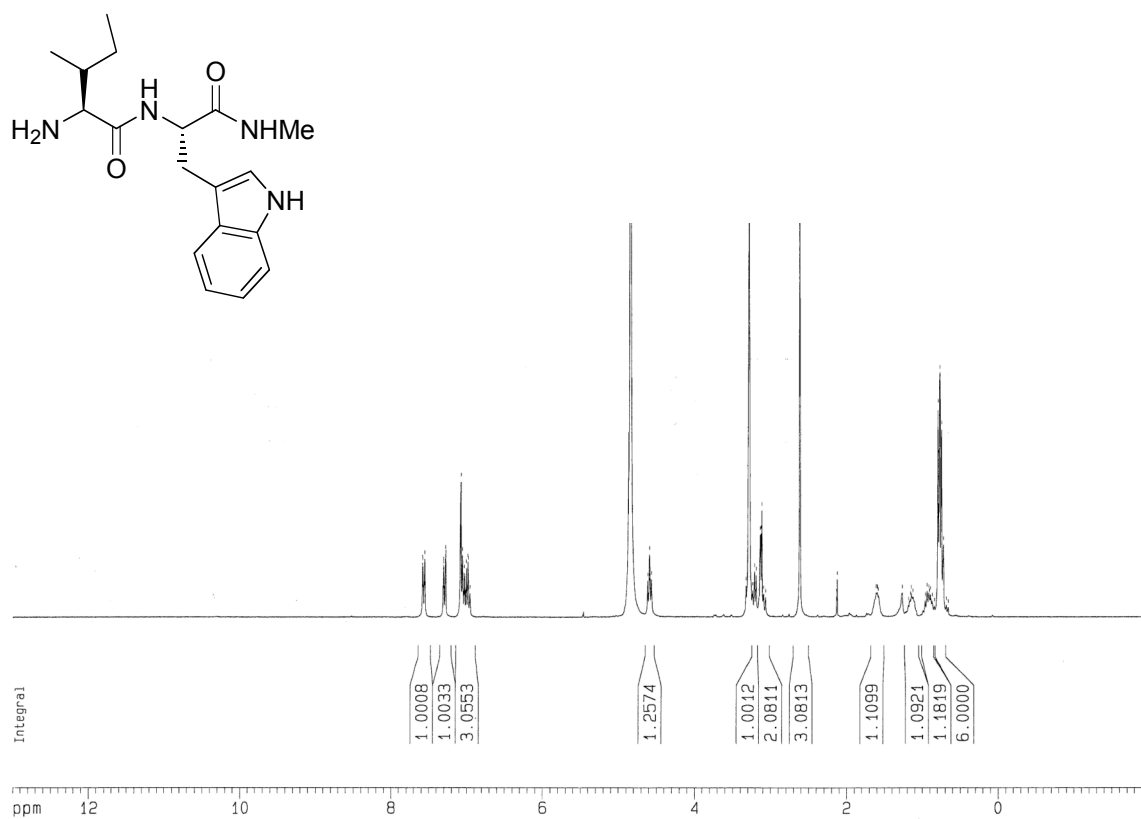

**Figure S53.** <sup>1</sup>H NMR spectrum of compound **11f**.

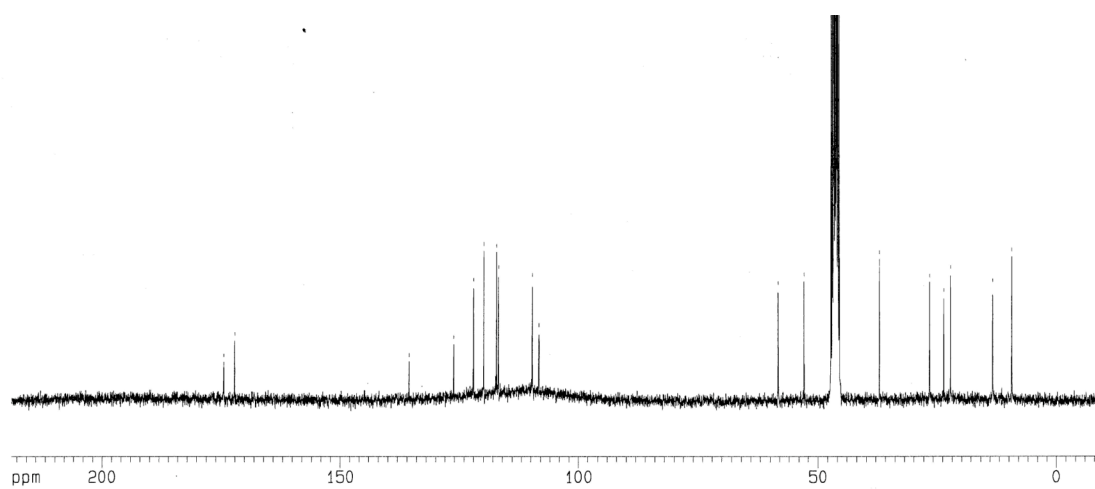

**Figure S54.** <sup>13</sup>C NMR spectrum of compound **11f**.

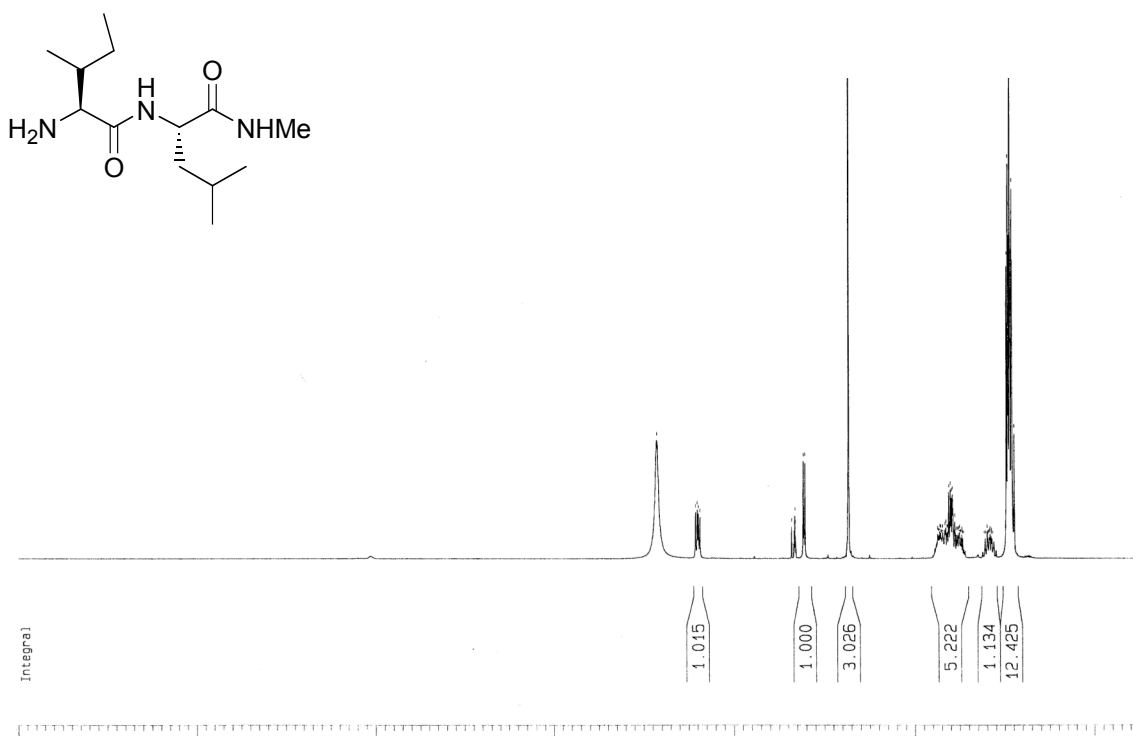

**Figure S55.**  $^1\text{H}$  NMR spectrum of compound **11g**.

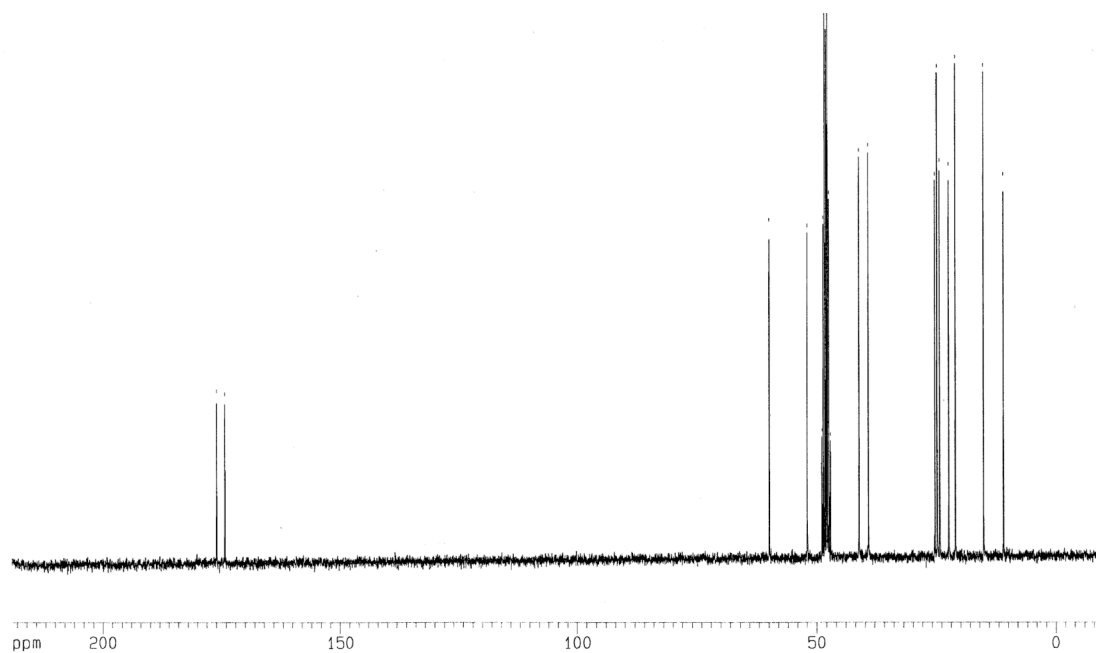

**Figure S56.**  $^{13}\text{C}$  NMR spectrum of compound **11g**.

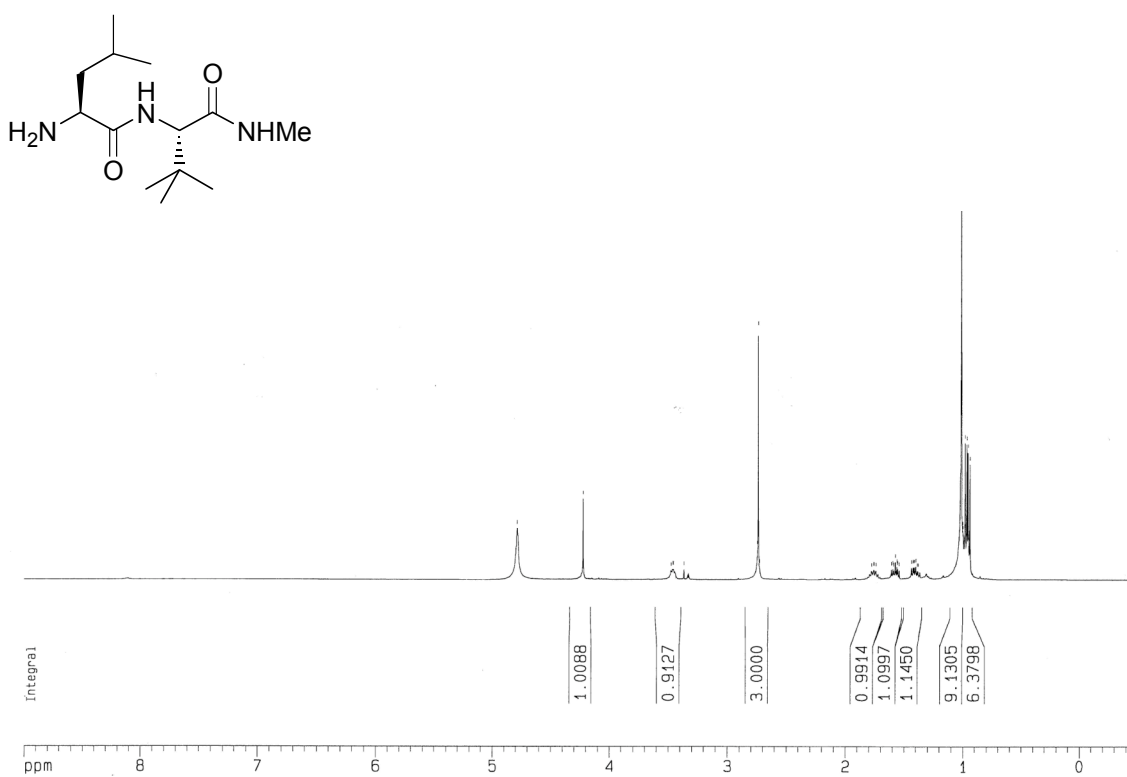

**Figure S57.** <sup>1</sup>H NMR spectrum of compound **11h**.

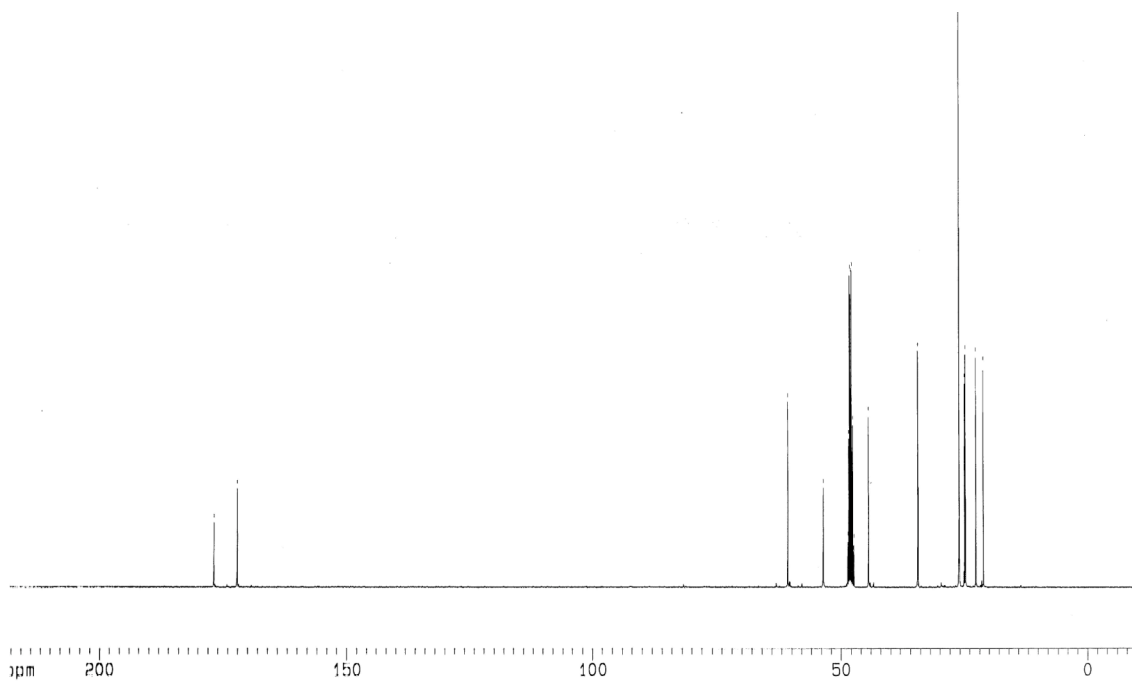

**Figure S58.** <sup>13</sup>C NMR spectrum of compound **11h**.

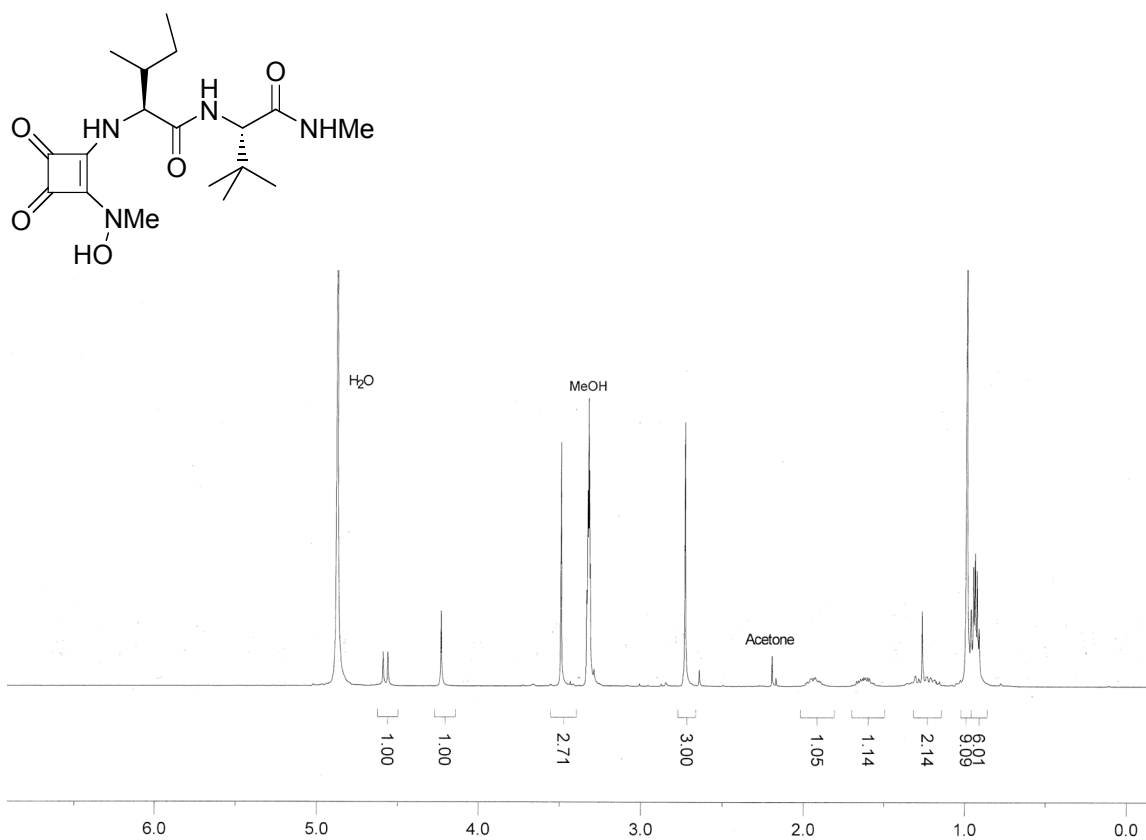

**Figure S59.** <sup>1</sup>H NMR spectrum of compound **12a**.

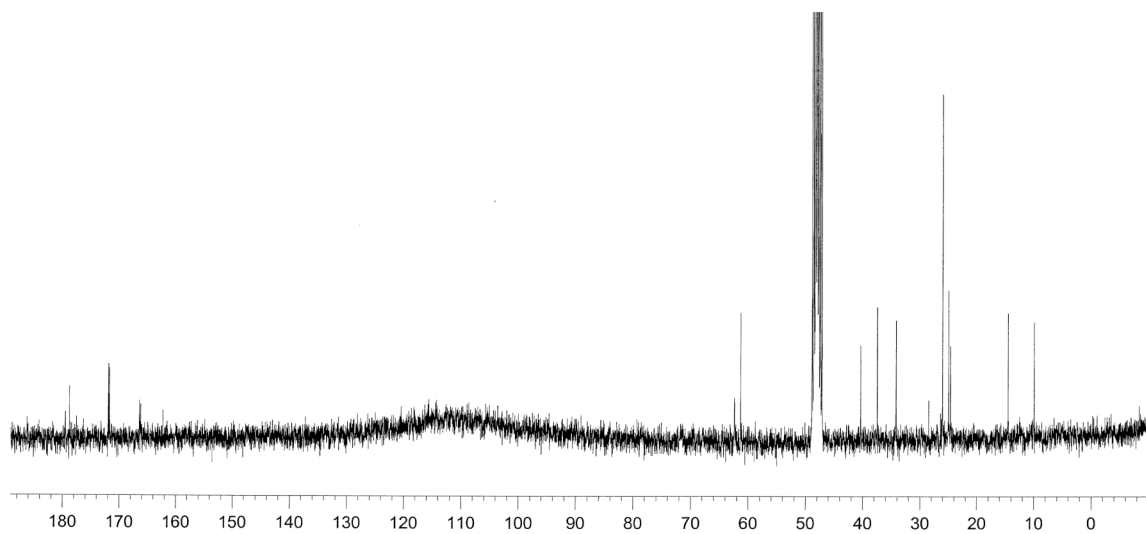

**Figure S60.** <sup>13</sup>C NMR spectrum of compound **12a**.

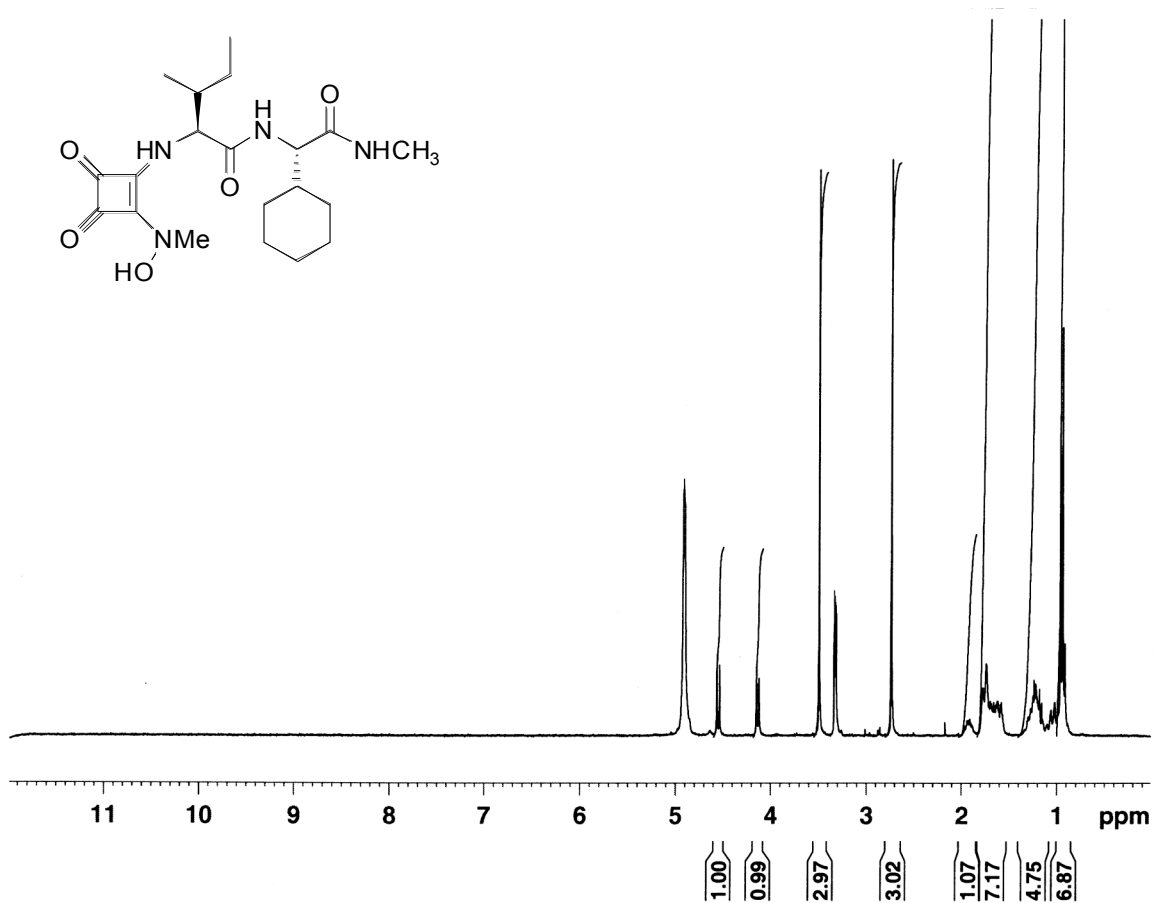

**Figure S61.**  $^1\text{H}$  NMR spectrum of compound **12b**.

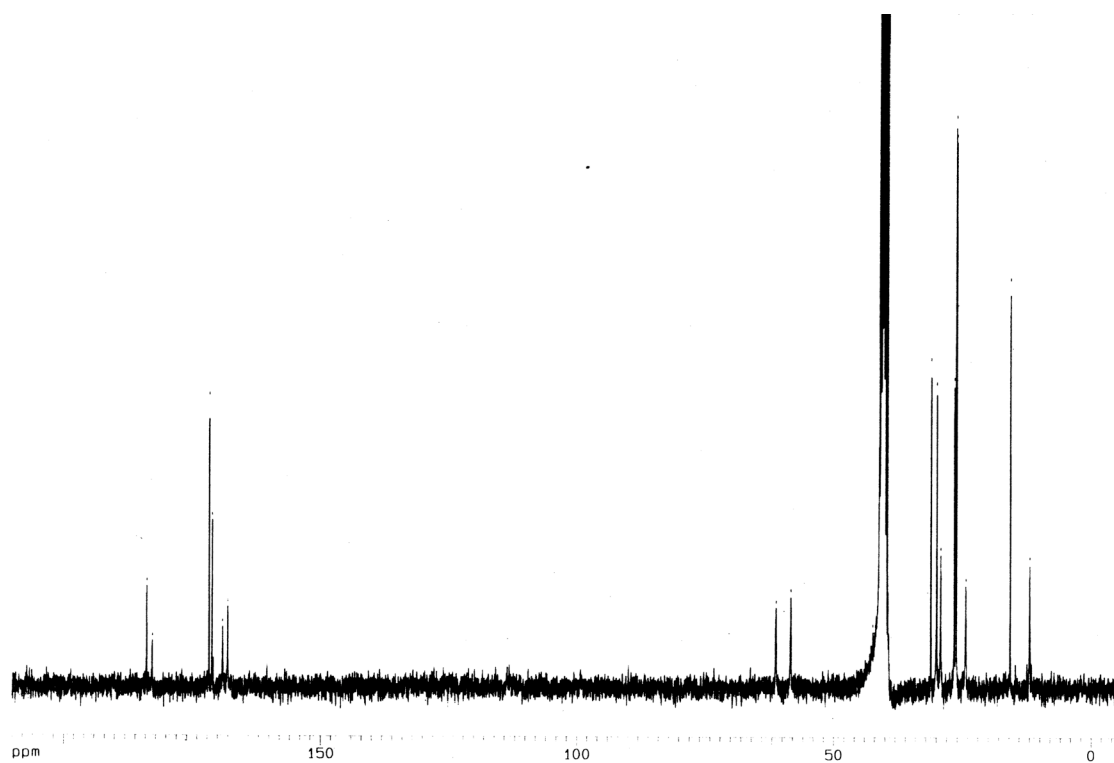

**Figure S62.**  $^{13}\text{C}$  NMR spectrum of compound **12b**.

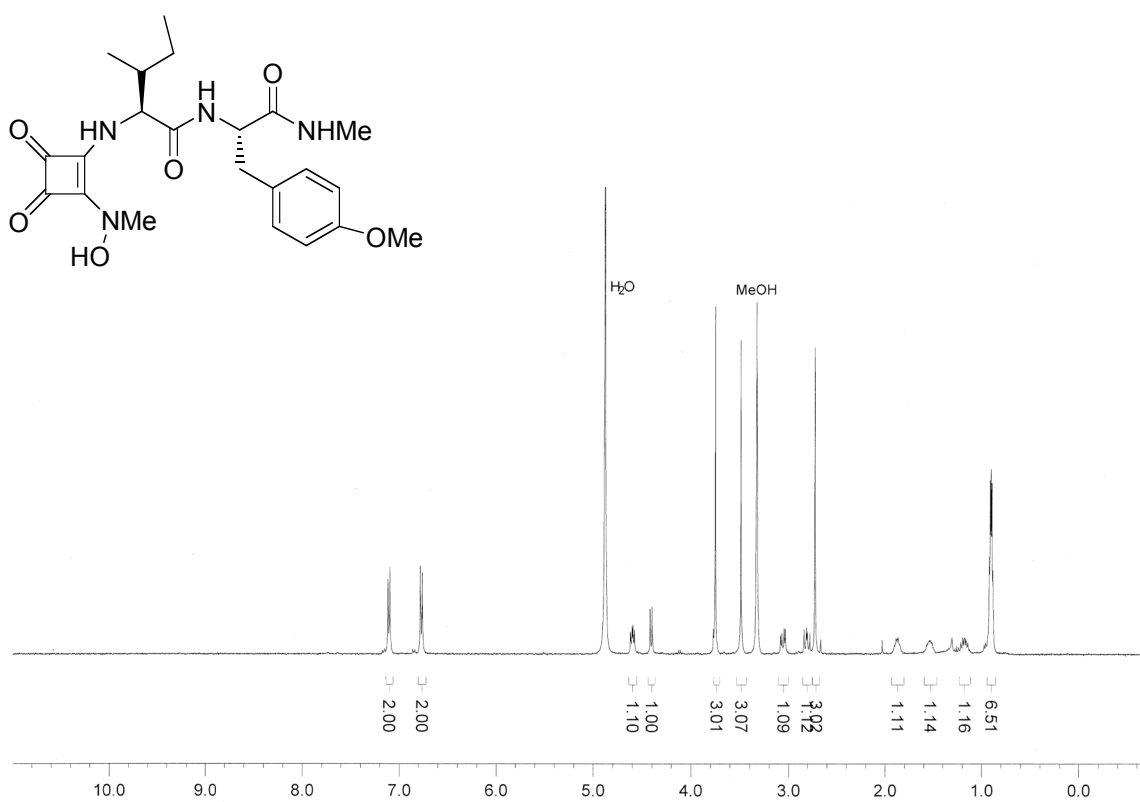

**Figure S63.** <sup>1</sup>H NMR spectrum of compound 12c.

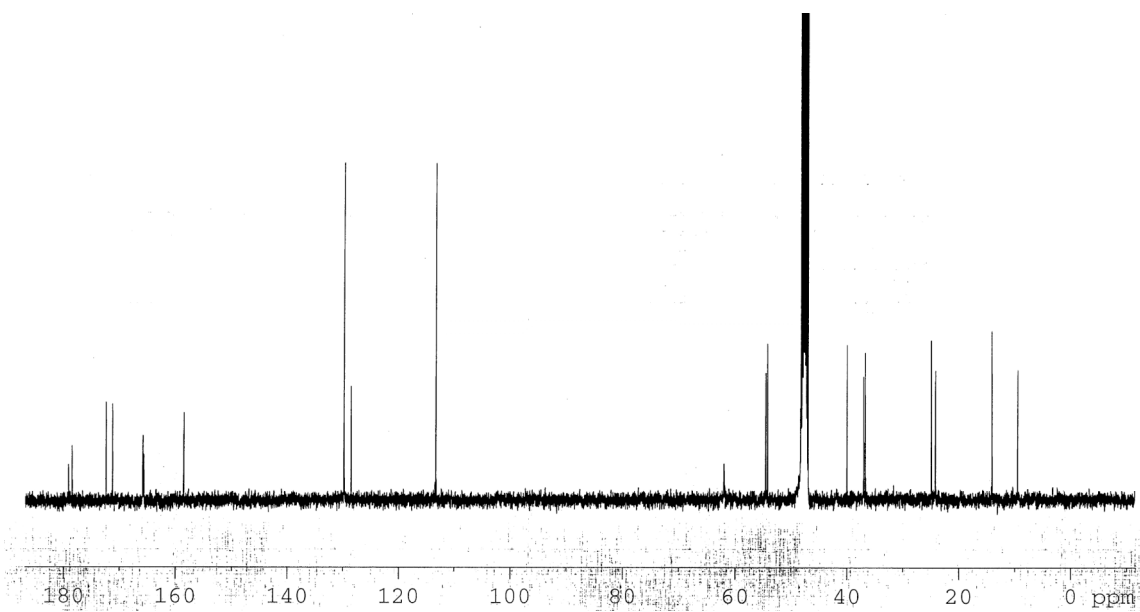

**Figure S64.** <sup>13</sup>C NMR spectrum of compound 12c.

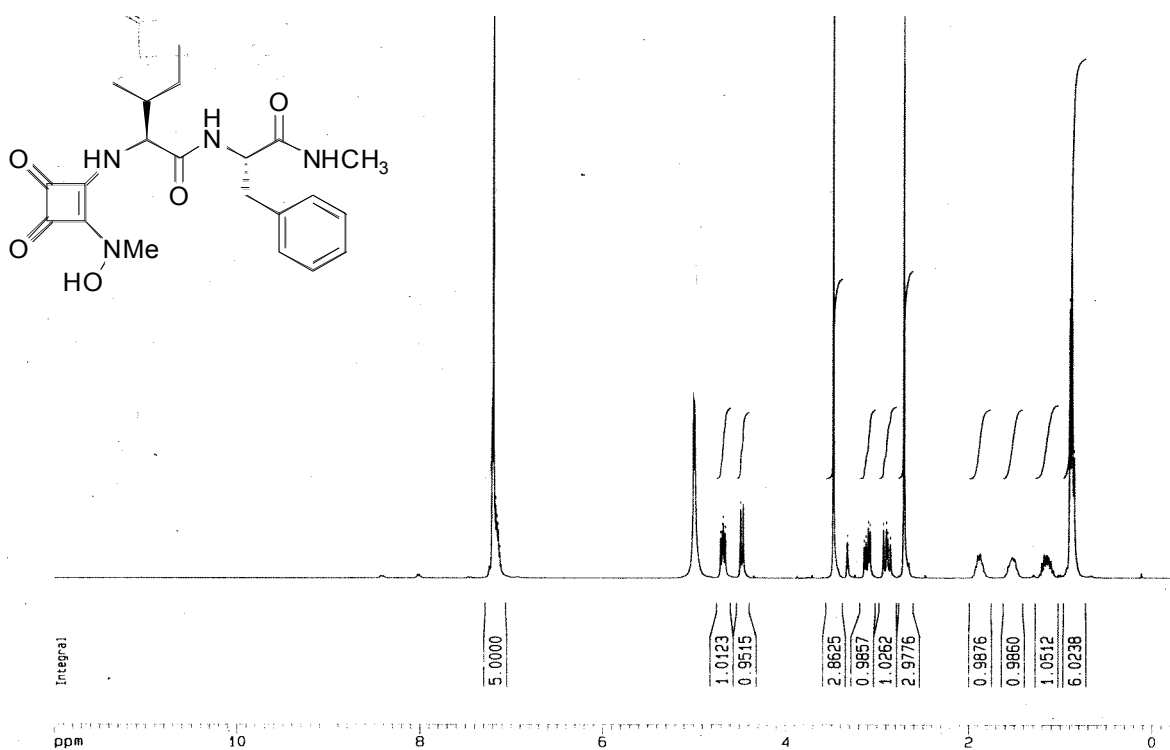

**Figure S65.** <sup>1</sup>H NMR spectrum of compound 12d.

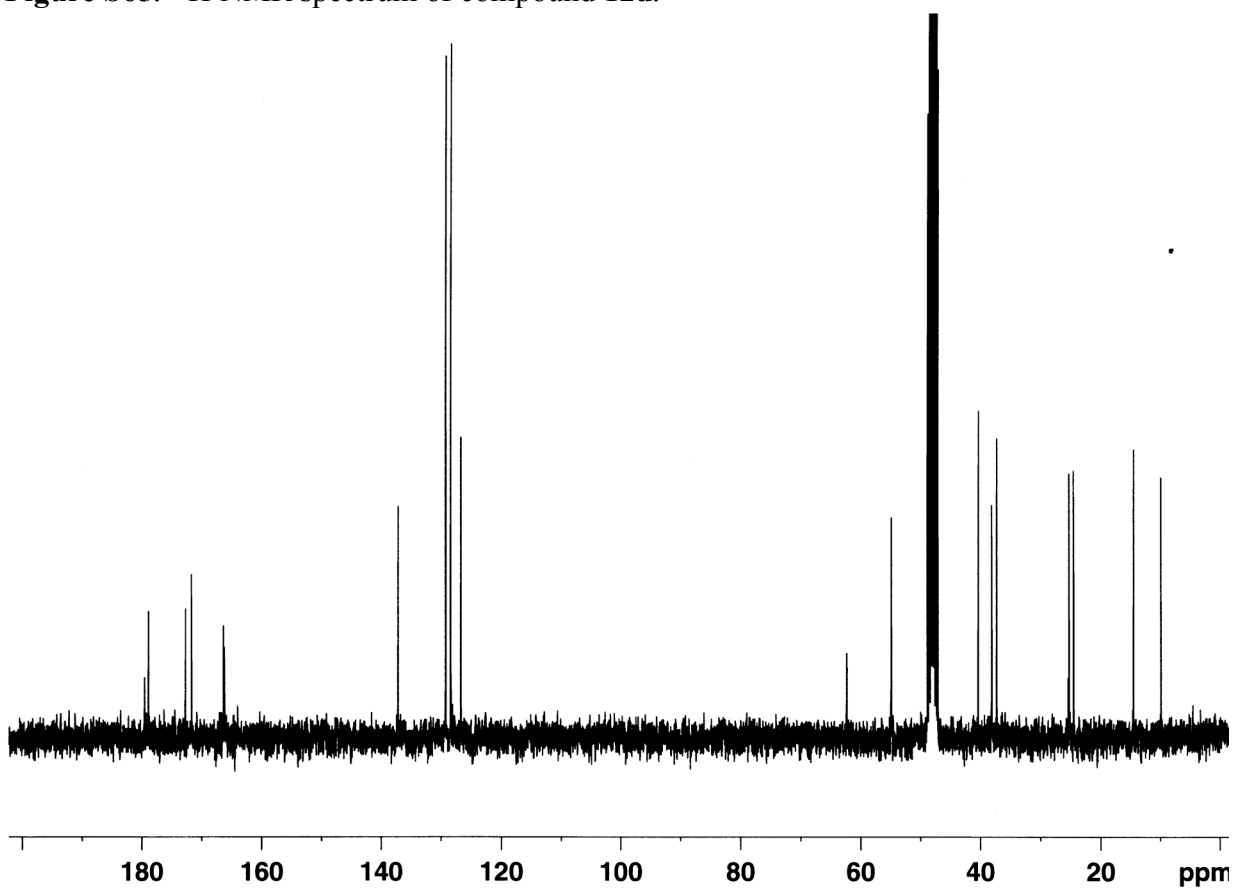

**Figure S66.** <sup>13</sup>C NMR spectrum of compound 12d.



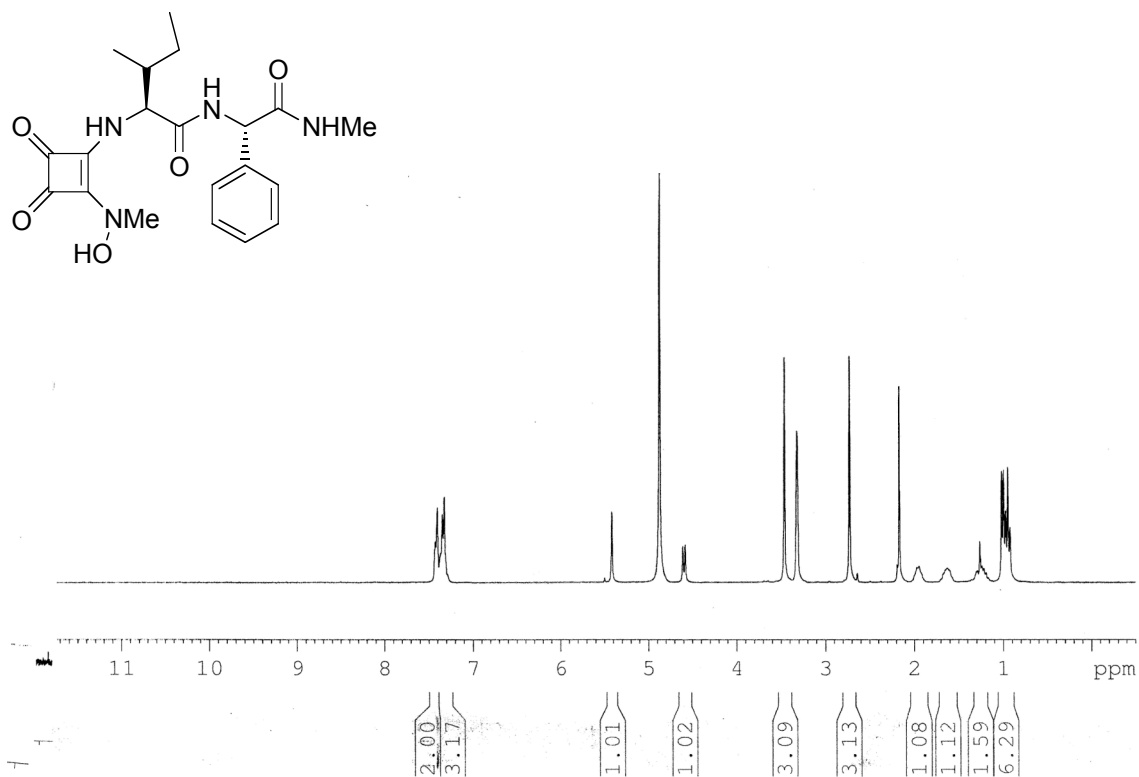

**Figure S67.** <sup>1</sup>H NMR spectrum of compound 12e.

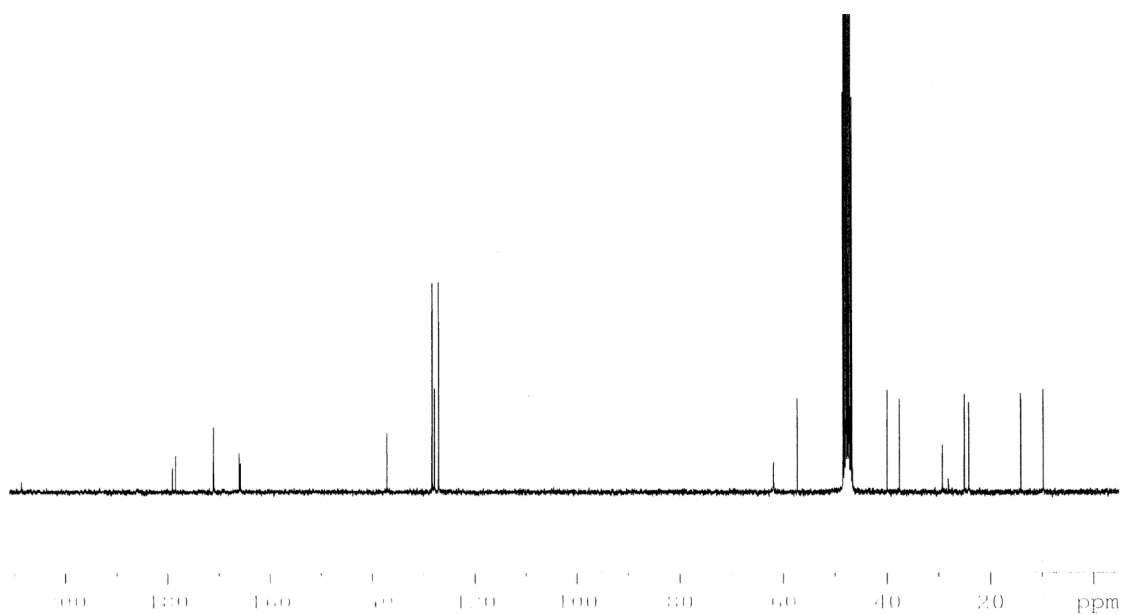

**Figure S68.** <sup>13</sup>C NMR spectrum of compound 12e.

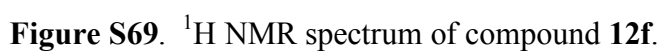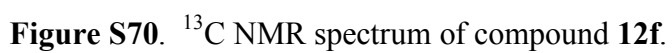

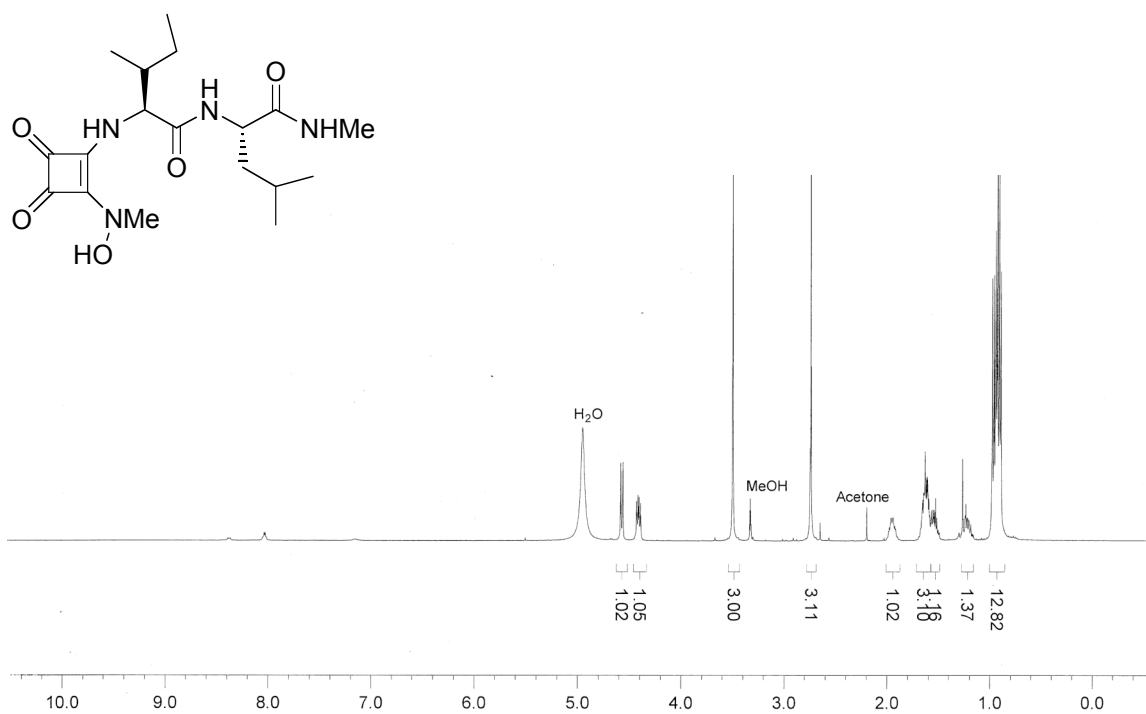

**Figure S71.**  $^1\text{H}$  NMR spectrum of compound **12g**.

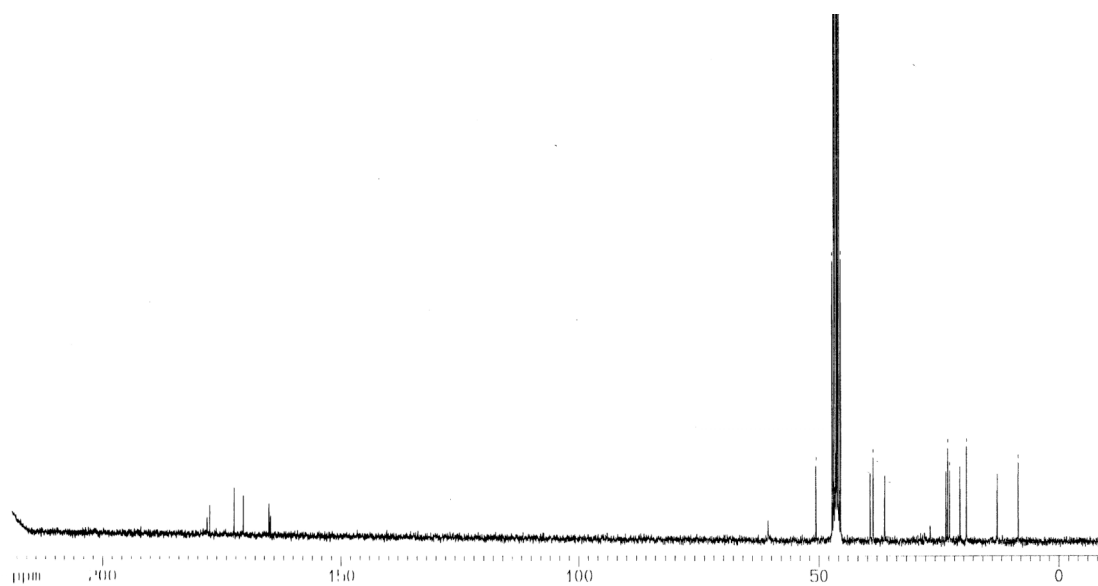

**Figure S72.**  $^{13}\text{C}$  NMR spectrum of compound **12g**.

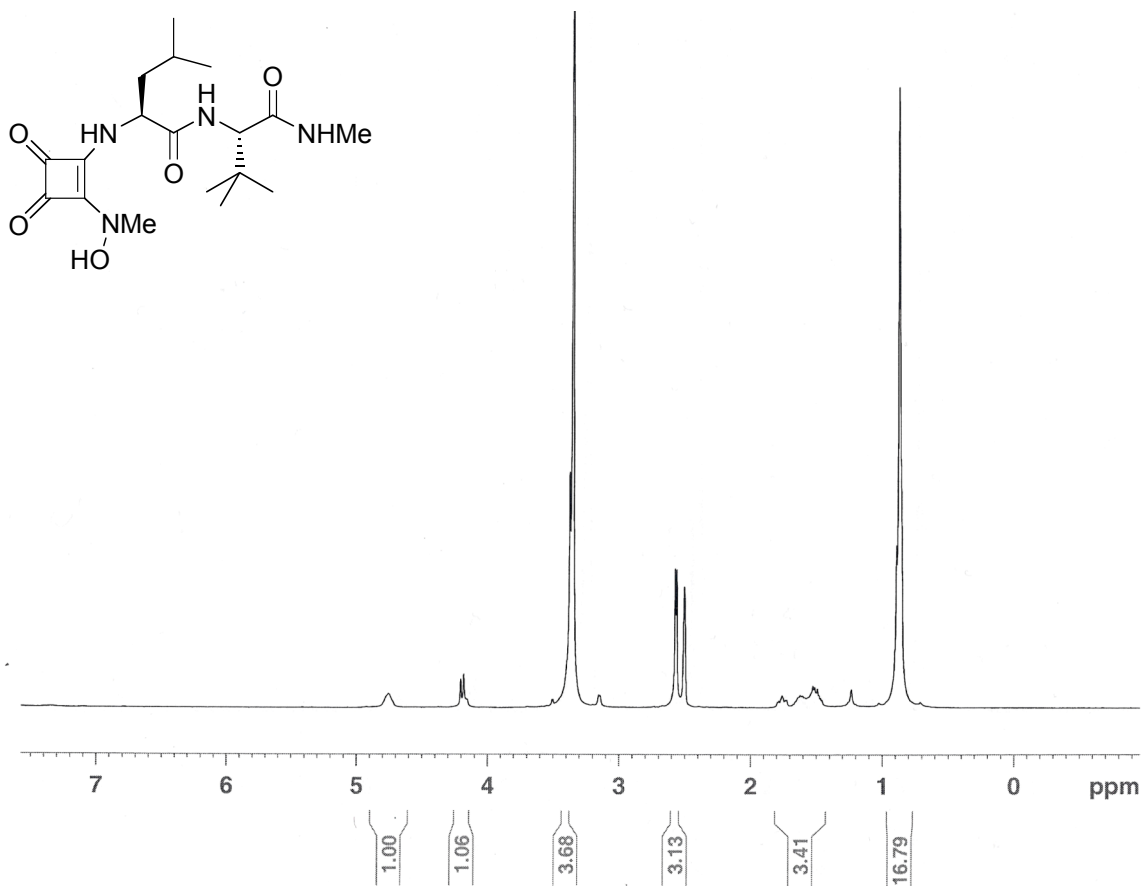

**Figure S73.**  $^1\text{H}$  NMR spectrum of compound **12h**.

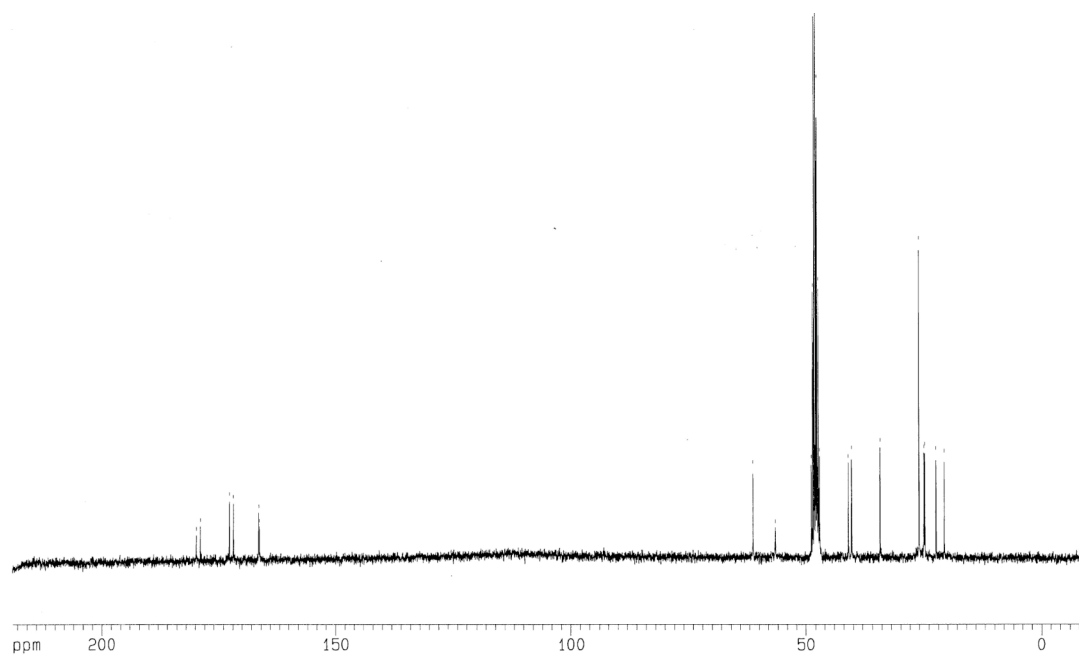

**Figure S74.**  $^{13}\text{C}$  NMR spectrum of compound **12h**.

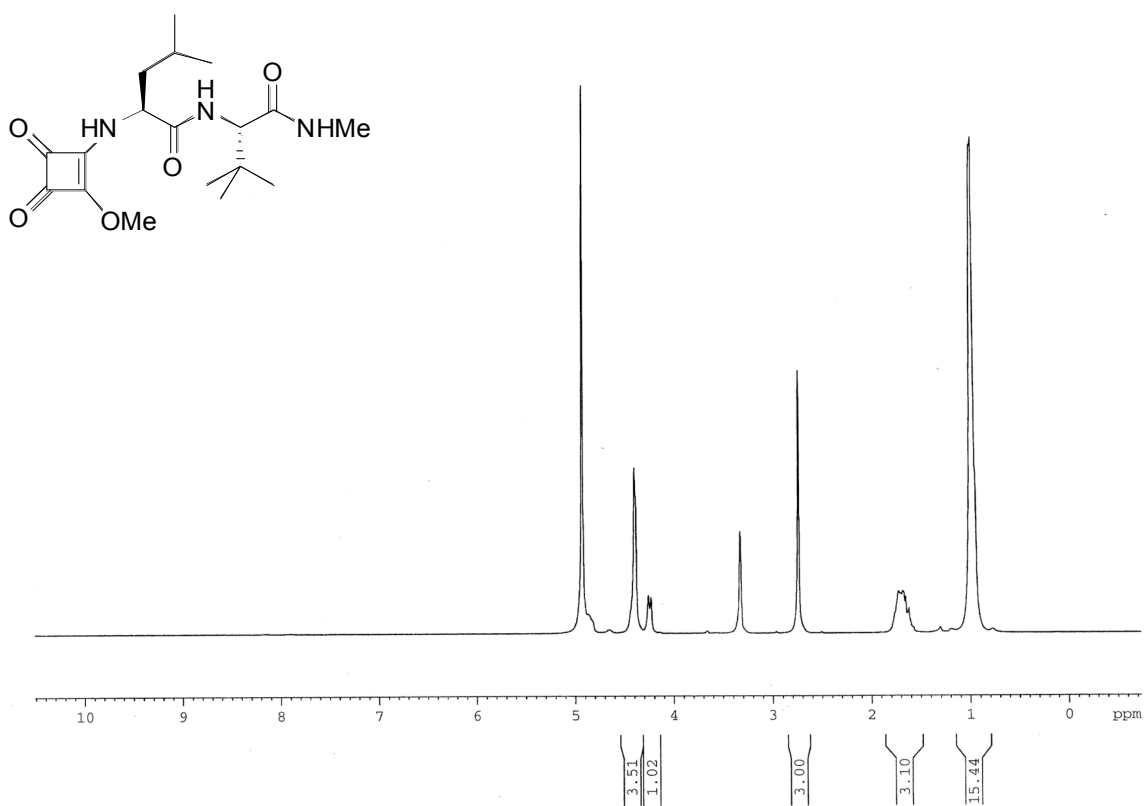

**Figure S75.** <sup>1</sup>H NMR spectrum of compound **13**.

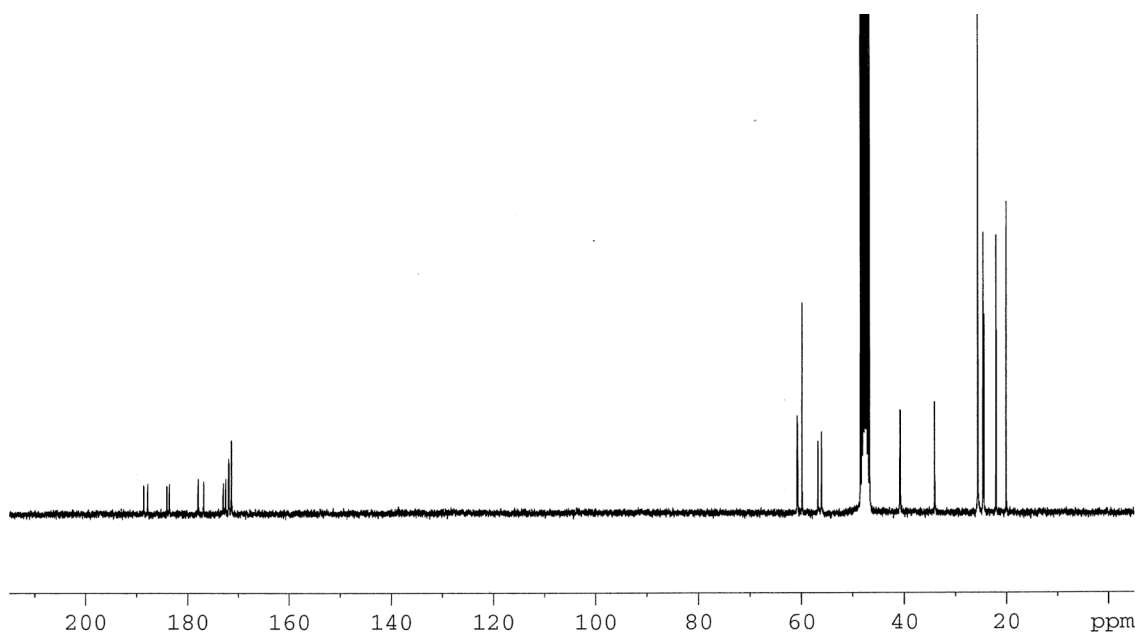

**Figure S76.** <sup>13</sup>C NMR spectrum of compound **13**.



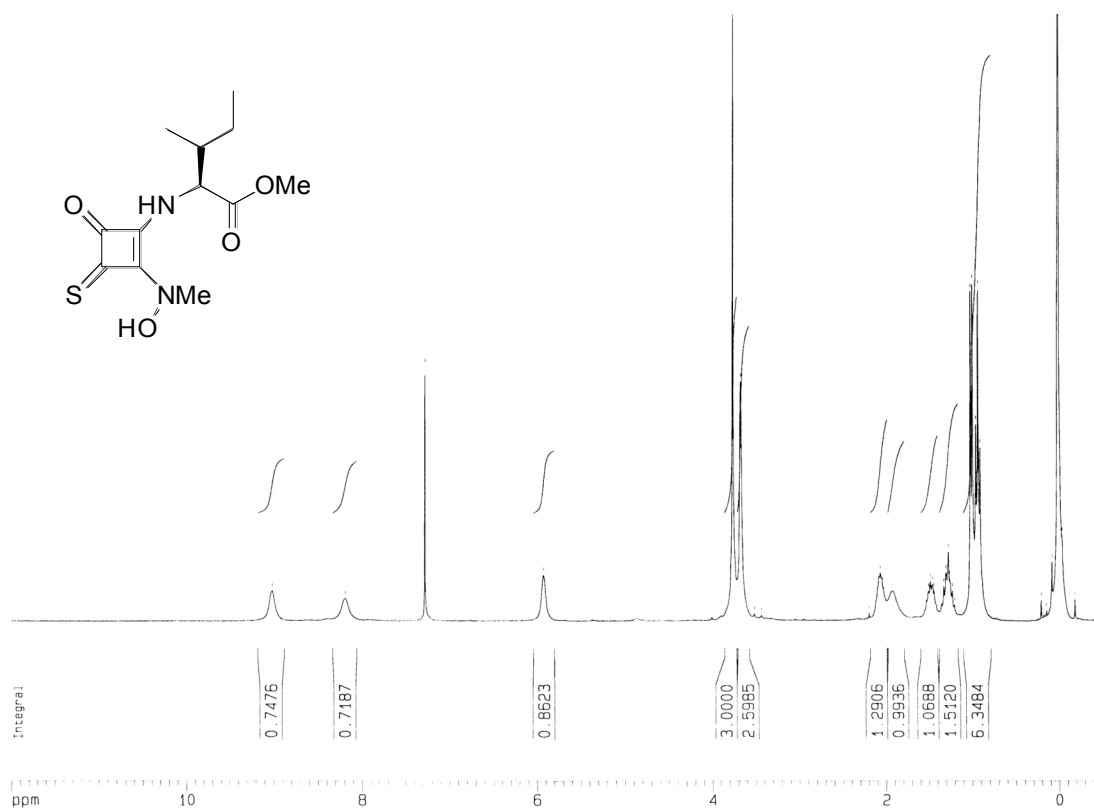

**Figure S79.** <sup>1</sup>H NMR spectrum of compound 15.

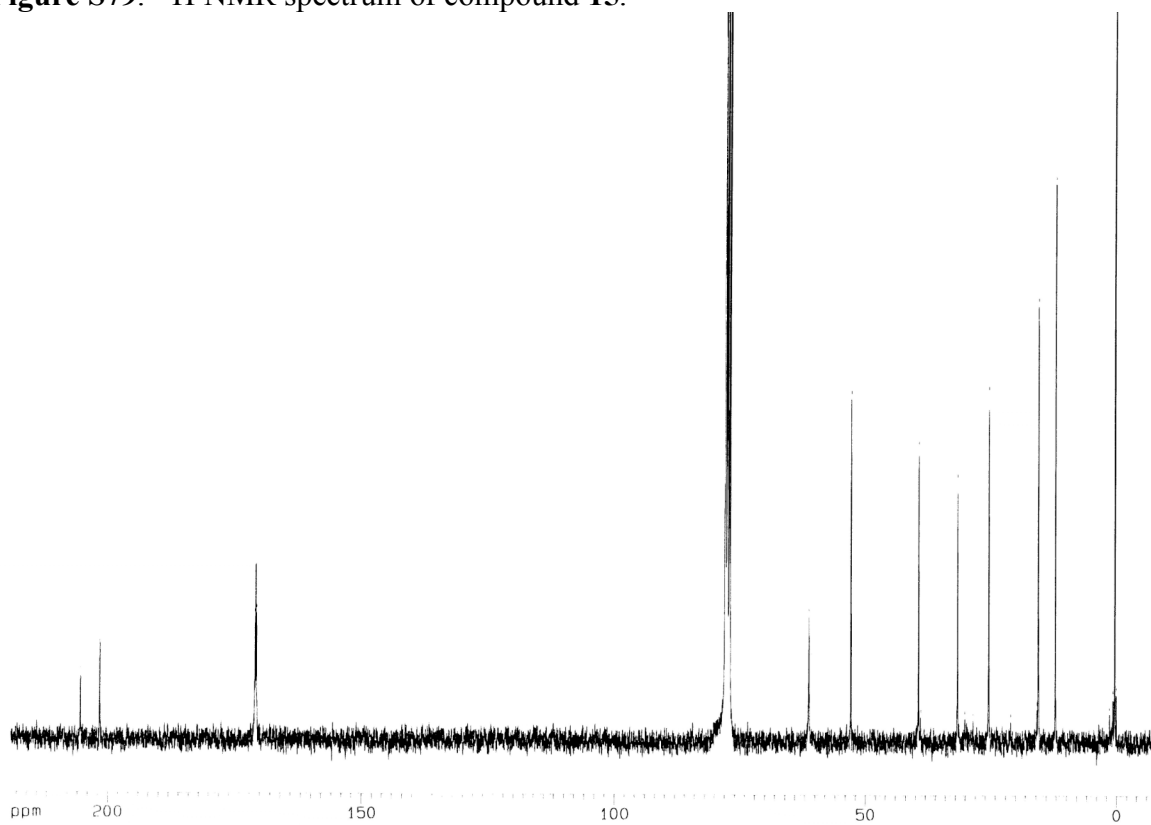

**Figure S80.** <sup>13</sup>C NMR spectrum of compound 15.

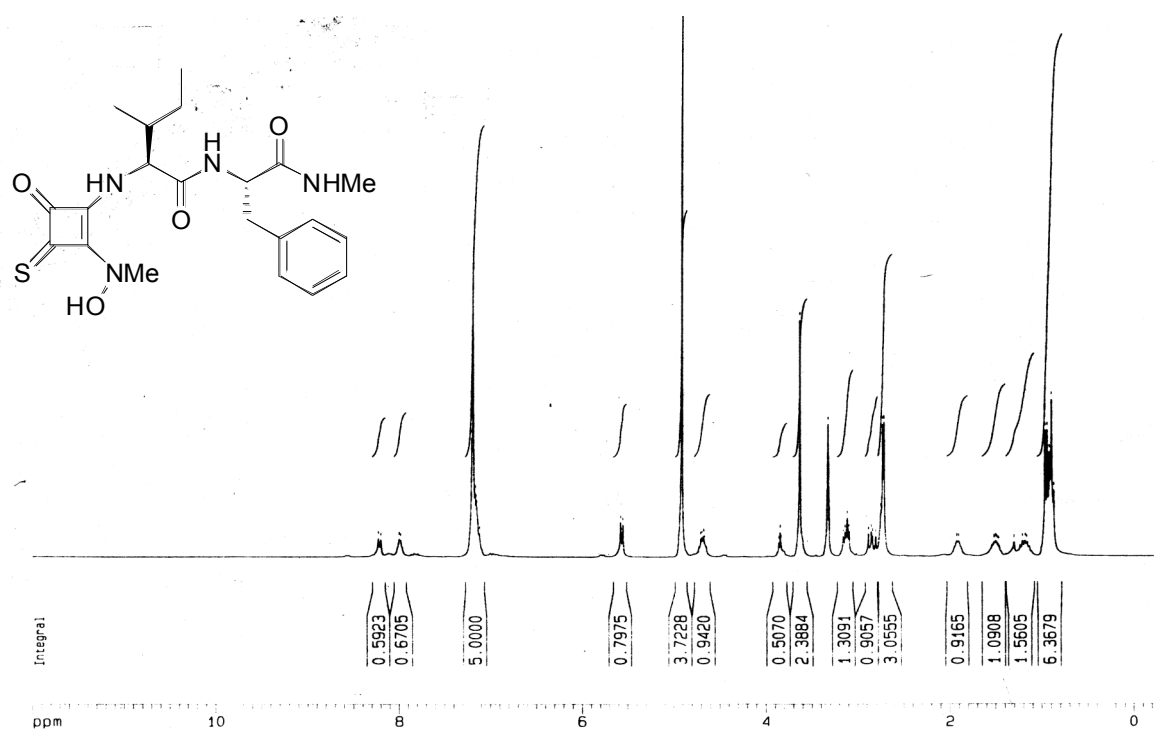

**Figure S81.** <sup>1</sup>H NMR spectrum of compound 16.

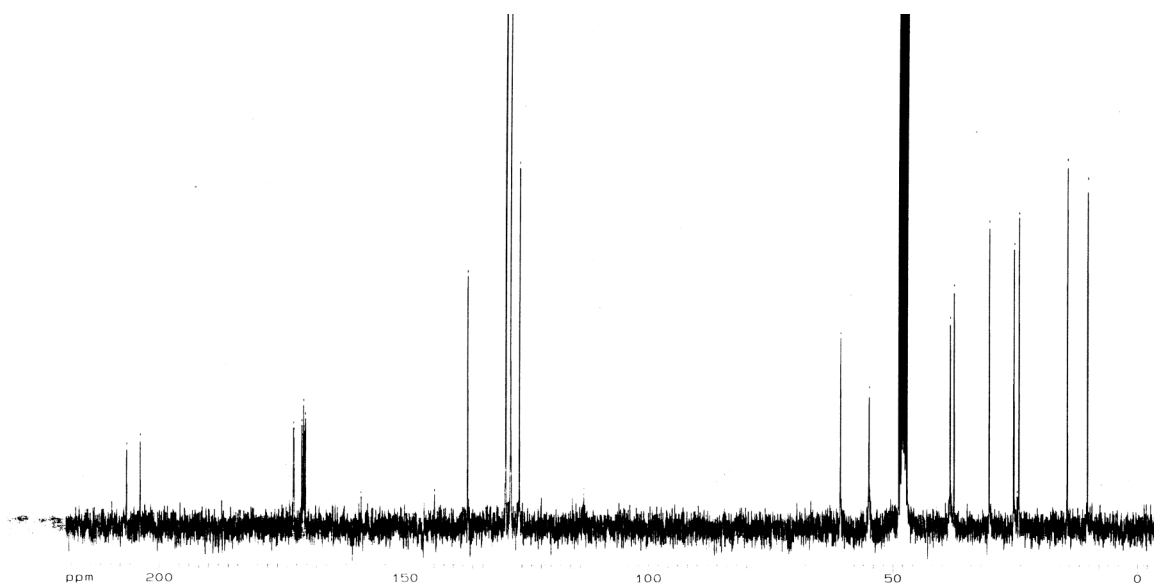

**Figure S82.** <sup>13</sup>C NMR spectrum of compound 16.



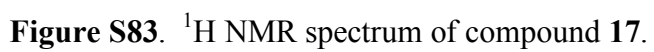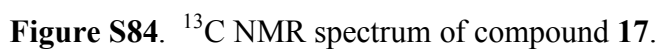

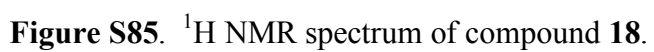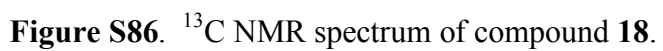

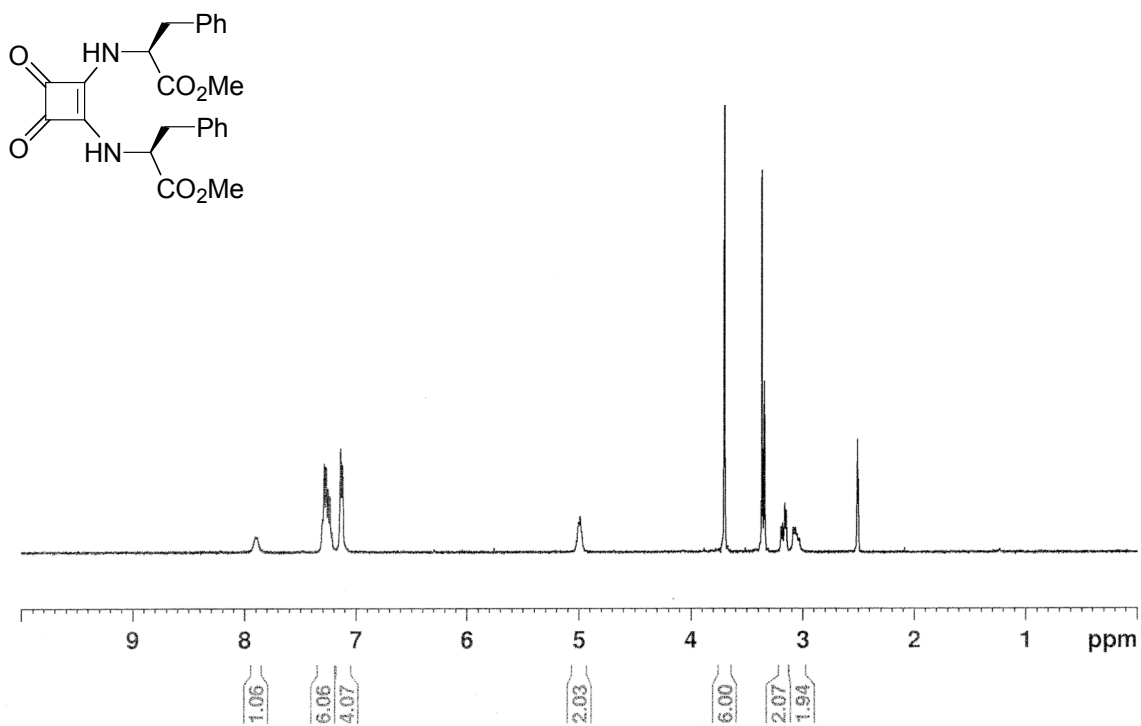

**Figure S87.** <sup>1</sup>H NMR spectrum of compound 19.

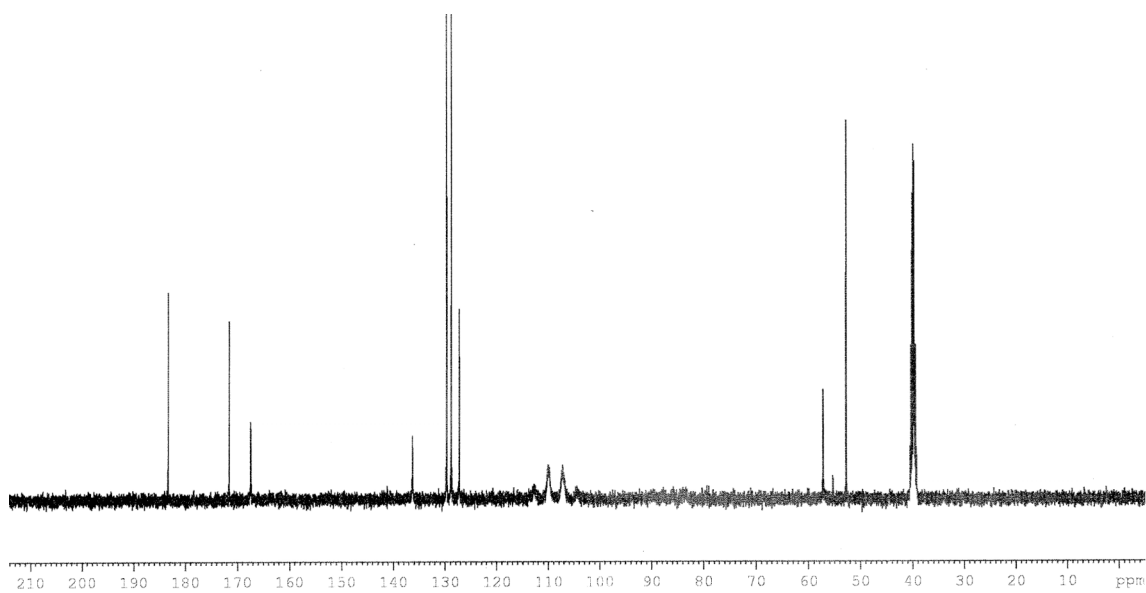

**Figure S88.** <sup>13</sup>C NMR spectrum of compound 19.

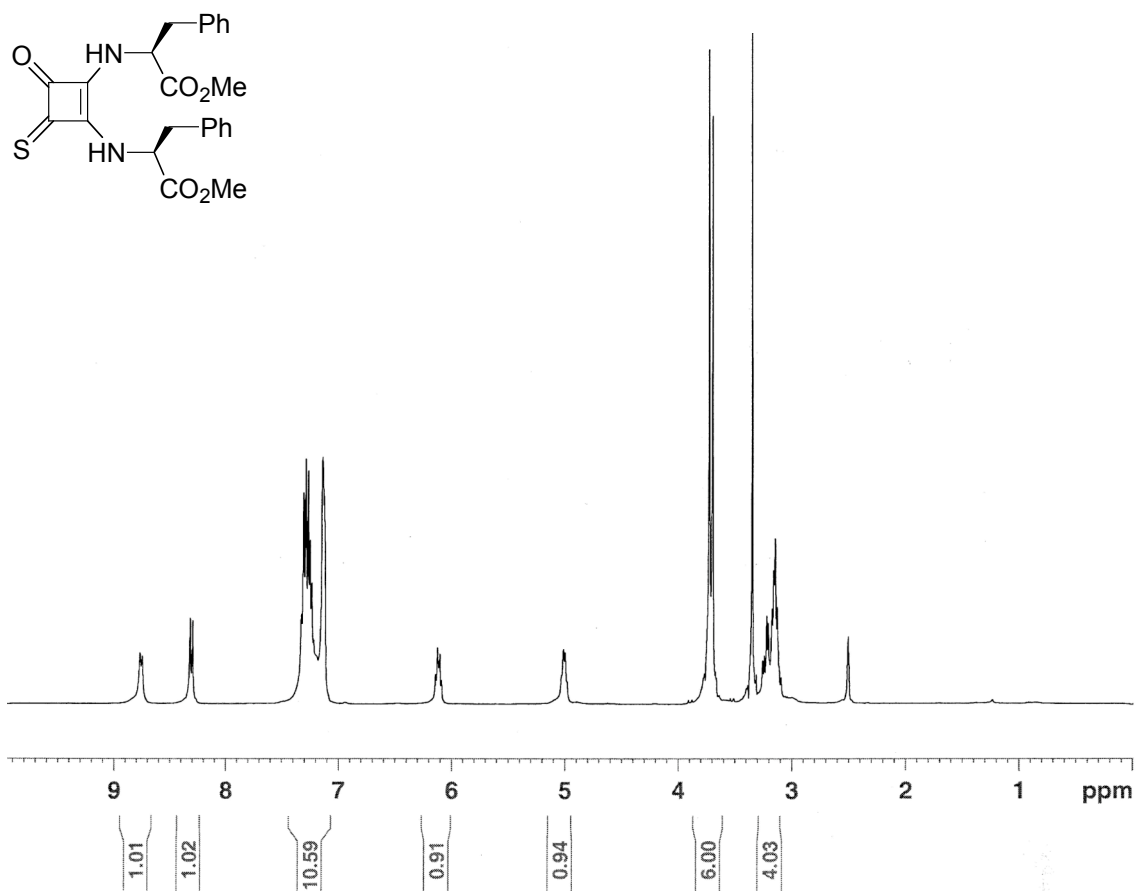

**Figure S89.** <sup>1</sup>H NMR spectrum of compound 20.

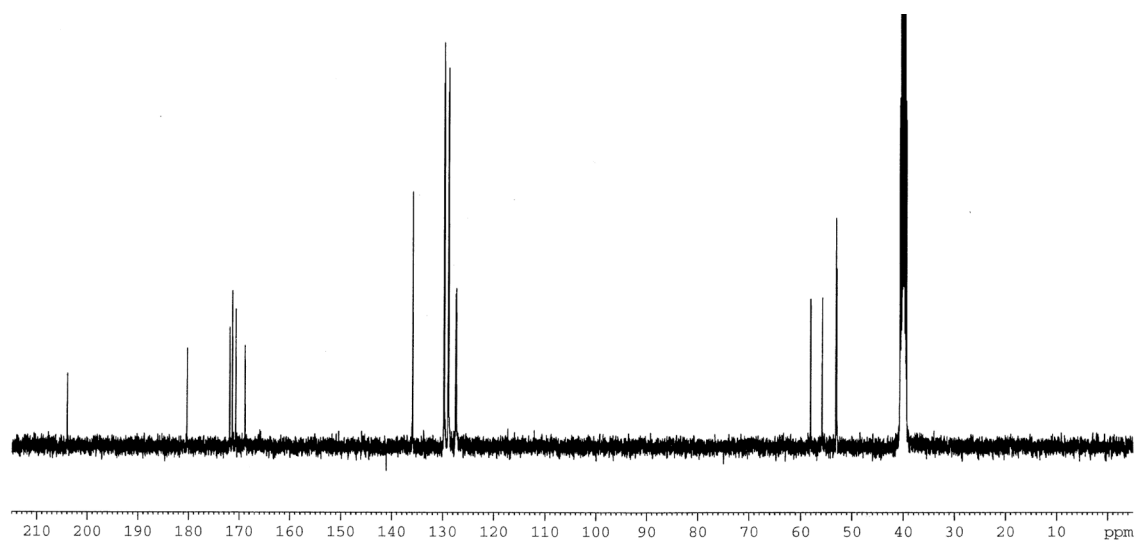

**Figure S90.** <sup>13</sup>C NMR spectrum of compound 20.

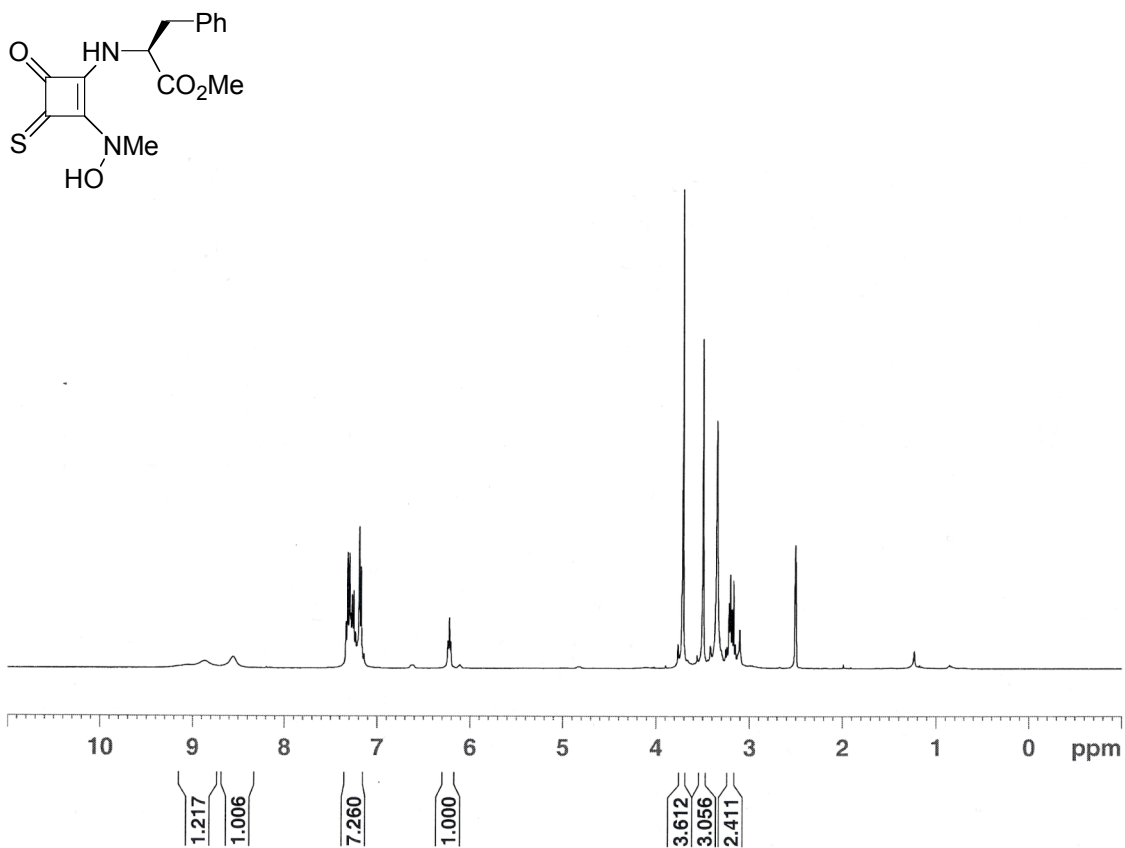

**Figure S91.** <sup>1</sup>H NMR spectrum of compound 21.

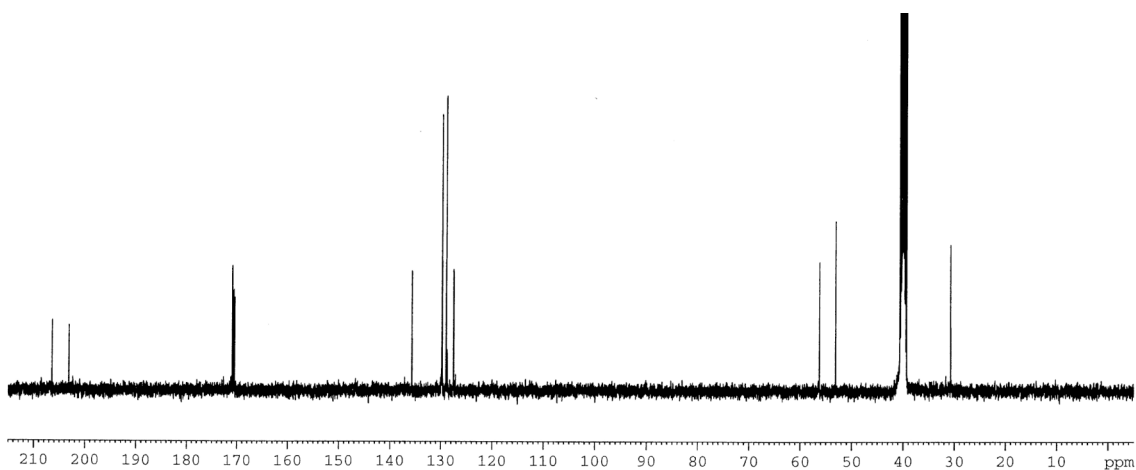

**Figure S92.** <sup>13</sup>C NMR spectrum of compound 21.

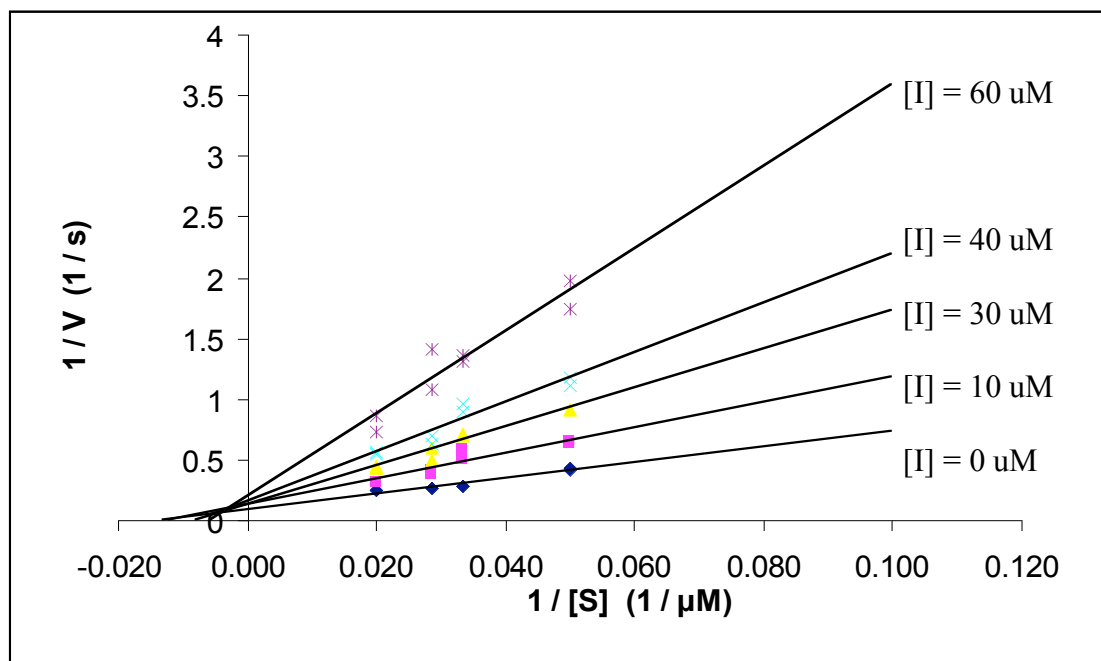

**Figure S93.** Lineweaver-Burk plot for the inhibition of MMP-1 by compound **16**. The activity of MMP-1 was measured under the same conditions as described in the experimental section in the presence of the following concentrations of **16**: 60 uM, 40 uM, 30 uM, 10 uM and 0 uM. The substrate concentrations used in the assays were 20, 30, 35, and 50 uM.

### References

- <sup>1</sup> Lim, N. C.; Morton, M. D.; Jenkins, H. A.; Bruckner, C. *J. Org. Chem.* **2003**, *68*, 9233-9241.
- <sup>2</sup> Reichard, G. A.; Stengone, C.; Paliwal, S.; Mergelsberg, I.; Majmundar, S.; Wang, C.; Tiberi, R.; McPhail, A. T.; Piwinski, J. J. and Shih, N.-Y. *Org. Lett.* **2003**, *5*, 4249-4251.
- <sup>3</sup> Kortylewicz, Z. P. and Galardy, R. E. *J. Med. Chem.* **1990**, *33*, 263-273.
